# Supplementary material for: Health Workforce Equity in Urban Community Health Service of China
Source: PLoS One. 2014 Dec 31;9(12):e115988. doi: 10.1371/journal.pone.0115988 (PMC4281229; doi:10.1371/journal.pone.0115988)
Supplement: S1 Data — The original database. There are all the raw data of this study to calculate the Gini coefficient. The others census data can be found in the web site of National Bureau of Statistics of the People's Republic of China. (XLS) [file pone.0115988.s001.xls]

## Sheet: 改
省	地市	区	区（县）	名	联系方式	服务面积（平方公里）	服务人口（万人）	2010在岗人员：卫技人员数（人）	本科及以上（人）	执业医师（人）	副高级以上（人）	中级（人）		人数百分比	服务面积百分比	人均拥有卫生资源	地均拥有卫生资源	人均拥有卫生资源百分比	地均拥有卫生资源百分比	地均拥有本科以上资源	人均拥有本科以上资源	地均拥有本科以上资源百分比	人均拥有本科以上资源百分比	地均拥有执业医师	人均拥有执业医师	地均拥有执业医师百分比	人均拥有执业医师百分比	地均拥有中级以上医师	人均拥有中级以上医师	地均拥有中级以上医师百分比	人均拥有中级以上医师百分比		人数百分比		人均拥有卫生资源百分比	人数百分比				人均拥有本科以上资源百分比	人数百分比				人均拥有执业医师百分比	人数百分比
n0a	n0b	n0c	n11		n12	n13	n14	n41	n41a	n42a	n43a	n43b																								0	0	0				0	0				0	0
河北	石家庄市	1	裕华	1裕华路街道办事处社区卫生服务中心	85250097	6.7	2.98	18	6	9	2	9	11	0.00334149	0.00279475	6.04027	2.68657	0.00314094	0.00130008	0.895522	2.01342	0.00122914	0.00415966	1.34328	3.02013	0.00169507	0.00431877	1.64179	3.69128	0.00228199	0.00558908		0.00334149		0.000541667	0.0139939	0.000541667	0.0139939		0	0.00220022	0	0.00220022		0	0.00527013	0	0.00527013
		1	裕华	2裕兴街道办事处社区卫生服务中心	13091021231	6	2	16	10	4	3	11	14	0.00224261	0.00250276	8	2.66667	0.00416	0.00129044	1.66667	5	0.00228757	0.00686272	0.666667	2	0.000841258	0.00285999	2.33333	7	0.00324319	0.0105989		0.00224261		0.000650001	0.00448522	0.00119167	0.0184791		0	0.00134557	0	0.00354579		0	0.00560653	0	0.0108767
		1	裕华	3裕强社区卫生服务中心	13503214147	6	3.7	22	11	10	4	16	20	0.00414883	0.00250276	5.94595	3.66667	0.0030919	0.00177436	1.83333	2.97297	0.00251633	0.00408053	1.66667	2.7027	0.00210314	0.00386485	3.33333	5.40541	0.00463312	0.0081845		0.00414883		0.000705086	0.0066157	0.00189675	0.0250948		0	0.00114956	0	0.00469535		0	0.00448522	0	0.0153619
		2	桥东	1汇通街道办事处社区卫生服务中心	0311-86015448	8.5	0.5	20	5	7	2	1	3	0.000560653	0.00354557	40	2.35294	0.0208	0.00113863	0.588235	10	0.000807378	0.0137254	0.823529	14	0.0010392	0.0200199	0.352941	6	0.000490566	0.0090848		0.000560653		0.000728001	0.0112131	0.00262475	0.0363079		0	0.00280326	0	0.00749862		0.000312681	0.0153843	0.000312681	0.0307462
		2	桥东	2桃园社区卫生服务中心	86834447	22	2.9221	20	8	12	2	5	7	0.00327657	0.00917678	6.84439	0.909091	0.00355909	0.000439924	0.363636	2.73776	0.000499107	0.00375769	0.545455	4.10664	0.000688302	0.00587246	0.318182	2.39554	0.000442253	0.00362716		0.00327657		0.000733872	0.00556167	0.00335863	0.0418695		0	0.005158	0	0.0126566		0.000476665	0.00336392	0.000789345	0.0341101
		2	桥东	3阜康新区社区卫生服务中心	89618863	1.28	9.9093	24	13	12	3	11	14	0.0111113	0.000533922	2.42197	18.75	0.00125942	0.00907344	10.1562	1.3119	0.0139399	0.00180064	9.375	1.21098	0.0118302	0.0017317	10.9375	1.41281	0.0152024	0.00213919		0.0111113		0.000795919	0.0153843	0.00415455	0.0572538		0	0.00141284	0	0.0140695		0.00050709	0.0126483	0.00129644	0.0467584
		3	桥西	1裕西街道办事处社区卫生服务中心	0311-87870741	1.6	3.2	40	7	13	1	3	4	0.00358818	0.000667402	12.5	25	0.00650001	0.0120979	4.375	2.1875	0.00600488	0.00300244	8.125	4.0625	0.0102528	0.00580935	2.5	1.25	0.00347484	0.00189267		0.00358818		0.000811053	0.00503242	0.0049656	0.0622863		0	0.0027472	0	0.0168167		0.000572914	0.0139939	0.00186935	0.0607523
		3	桥西	2石铜路社区卫生服务中心	83808356	10	1.9622	11	0	3	0	2	2	0.00220022	0.00417126	5.60595	1.1	0.0029151	0.000532309	0	0	0	0	0.3	1.5289	0.000378566	0.00218631	0.2	1.01926	0.000277987	0.0015433		0.00220022		0.000885107	0.00527013	0.00585071	0.0675564		0	0.00560653	0	0.0224232		0.000637252	0.00503242	0.0025066	0.0657847
		3	桥西	3友谊街道五阳计社区卫生服务中心	0311-86924426	1	1.2852	64	32	32	18	28	46	0.0014411	0.000417126	49.7977	64	0.0258948	0.0309707	32	24.8988	0.0439214	0.0341747	32	24.8988	0.0403804	0.0356052	46	35.7921	0.0639371	0.054194		0.0014411		0.000986208	0.00650357	0.00683691	0.07406		0	0.00437309	0	0.0267963		0.00071859	0.0022314	0.00322519	0.0680161
	承德市	1	双滦	1钢城街道社区卫生服务中心	4314508	11.112	3.4	28	8	13	1	7	8	0.00381244	0.00463511	8.23529	2.5198	0.00428236	0.00121937	0.719942	2.35294	0.000988152	0.00322951	1.16991	3.82353	0.00147629	0.00546762	0.719942	2.35294	0.00100067	0.00356266		0.00381244		0.00106364	0.00493374	0.00790055	0.0789937		0	0.000784914	0	0.0275812		0.000727115	0.0066157	0.00395231	0.0746318
		1	双滦	2元宝山街道办事处社区卫生服务中心	4226369	56	5.0368	22	10	7	1	5	6	0.00564779	0.0233591	4.36785	0.392857	0.00227129	0.00019011	0.178571	1.98539	0.000245097	0.00272503	0.125	1.38977	0.000157736	0.00198736	0.107143	1.19123	0.000148922	0.00180368		0.00564779		0.00117188	0.00746341	0.00907243	0.0864571		0	0.00493374	0	0.0325149		0.000794441	0.00201835	0.00474675	0.0766502
		2	双桥	1潘家沟街道办事处社区卫生服务中心	0314-2151069	6.25	8.9	27	5	6	1	2	3	0.00997962	0.00260704	3.03371	4.32	0.00157753	0.00209052	0.8	0.561798	0.00109803	0.000771092	0.96	0.674157	0.00121141	0.000964041	0.48	0.337079	0.000667169	0.000510382		0.00997962		0.00119858	0.0126483	0.010271	0.0991054		0	0.00190622	0	0.0344212		0.000958136	0.0200822	0.00570488	0.0967324
		2	双桥	2新华路街道办事处社区卫生服务中心	0314-2123989	91.3	3.2	20	3	6	0	4	4	0.00358818	0.0380836	6.25	0.219058	0.00325	0.000106006	0.0328587	0.9375	4.51e-05	0.00128676	0.0657174	1.875	8.29279e-05	0.00268124	0.0438116	1.25	6.08954e-05	0.00189267		0.00358818		0.00121333	0.00336392	0.0114843	0.102469		0	0.00153697	0	0.0359581		0.000964041	0.00997962	0.00666892	0.106712
		2	双桥	3西大街道办事处社区卫生服务中心.	2025561	4.16	8	25	10	8	4	10	14	0.00897044	0.00173525	3.125	6.00962	0.001625	0.00290815	2.40385	1.25	0.00329938	0.00171568	1.92308	1	0.0024267	0.00142999	3.36538	1.75	0.00467767	0.00264973		0.00897044		0.00121702	0.00527013	0.0127014	0.107739		0	0.002579	0	0.0385371		0.000974996	0.00493374	0.00764392	0.111646
		3	营子	1兴煤社区卫生服务中心	0314-501809	42.5	2.3	22	3	4	0	2	2	0.002579	0.0177279	9.56522	0.517647	0.00497392	0.000250498	0.0705882	1.30435	9.68854e-05	0.00179027	0.0941176	1.73913	0.000118766	0.00248695	0.0470588	0.869565	6.54088e-05	0.00131664		0.002579		0.00125942	0.0111113	0.0139608	0.118851		0	0.00746341	0	0.0460005		0.00105243	0.00609429	0.00869635	0.11774
		3	营子	2北马圈子镇社区服务站	13730244450	25	1.526	11	1	3	0	4	4	0.00171111	0.0104282	7.20839	0.44	0.00374837	0.000212923	0.04	0.655308	5.49017e-05	0.000899439	0.12	1.96592	0.000151426	0.00281126	0.16	2.62123	0.00022239	0.00396889		0.00171111		0.00142269	0.0200822	0.0153835	0.138933		0	0.0112131	0	0.0572136		0.00113686	0.00282087	0.00983321	0.120561
		3	营子	3寿王坟社区卫生服务中心	0314-5049474	6	1.03	22	5	7	1	6	7	0.00115494	0.00250276	21.3592	3.66667	0.0111068	0.00177436	0.833333	4.85437	0.00114379	0.00666283	1.16667	6.79612	0.0014722	0.0097184	1.16667	6.79612	0.00162159	0.0102902		0.00115494		0.0014497	0.0185015	0.0168332	0.157435		0	0.00134557	0	0.0585591		0.00115322	0.00556167	0.0109864	0.126123
	保定市	1	新市	1新市场社区卫生服务中心	0312-3310178	0.27	0.9	26	16	15	1	10	11	0.00100917	0.000112624	28.8889	96.2963	0.0150222	0.0465994	59.2593	17.7778	0.0813359	0.0244008	55.5556	16.6667	0.0701048	0.0238332	40.7407	12.2222	0.056627	0.0185061		0.00100917		0.00149425	0.00195107	0.0183274	0.159386		0	0.000908257	0	0.0594674		0.00119166	0.00134557	0.0121781	0.127468
		1	新市	2建南社区卫生服务中心	0312-3301109	0.6	1.9441	47	12	18	1	4	5	0.00217993	0.000250276	24.1757	78.3333	0.0125714	0.0379068	20	6.17252	0.0274509	0.00847205	30	9.25878	0.0378566	0.01324	8.33333	2.57188	0.0115828	0.00389417		0.00217993		0.00156826	0.00706422	0.0198957	0.16645		0	0.000930683	0	0.0603981		0.00119166	0.00134557	0.0133698	0.128814
		1	新市	3朝阳社区卫生服务中心	0312-3188995	1.5	1.13	27	5	11	1	7	8	0.00126707	0.000625689	23.8938	18	0.0124248	0.0087105	3.33333	4.42478	0.00457514	0.0060732	7.33333	9.73451	0.00925383	0.0139203	5.33333	7.07965	0.00741299	0.0107195		0.00126707		0.00157753	0.00997962	0.0214732	0.17643		0	0.000560653	0	0.0609587		0.00120602	0.00930683	0.0145758	0.138121
		2	南市	1联盟路社区卫生服务中心	5069839	8	3	14	7	7	0	8	8	0.00336392	0.00333701	4.66667	1.75	0.00242667	0.000846855	0.875	2.33333	0.00120098	0.0032026	0.875	2.33333	0.00110415	0.00333665	1	2.66667	0.00138994	0.00403769		0.00336392		0.001625	0.00897044	0.0230982	0.1854		0.000322807	0.00717635	0.000322807	0.0681351		0.00122746	0.00261264	0.0158032	0.140733
		2	南市	2南关社区卫生服务中心	2190839	12	3	27	10	17	1	14	15	0.00336392	0.00500552	9	2.25	0.00468001	0.00108881	0.833333	3.33333	0.00114379	0.00457514	1.41667	5.66667	0.00178767	0.0081033	1.25	5	0.00173742	0.00757066		0.00336392		0.0016265	0.00609429	0.0247247	0.191494		0.000416525	0.00556167	0.000739332	0.0736968		0.00124347	0.005158	0.0170467	0.145891
		2	南市	3红阳社区卫生服务中心	5025107	4	0.8	7	2	2	0	3	3	0.000897044	0.00166851	8.75	1.75	0.00455001	0.000846855	0.5	2.5	0.000686272	0.00343136	0.5	2.5	0.000630943	0.00357498	0.75	3.75	0.00104245	0.005678		0.000897044		0.00169565	0.005158	0.0264204	0.196652		0.000430409	0.00538226	0.00116974	0.079079		0.00128906	0.00746341	0.0183358	0.153355
		3	北市	1西关社区卫生服务中心	5912316	0.2	4.7	8	22	0	1	2	3	0.00527013	8.34253e-05	1.70213	40	0.000885107	0.0193567	110	4.68085	0.15098	0.00642467	0	0	0	0	15	0.638298	0.020849	0.000966468		0.00527013		0.00177021	0.00527013	0.0281906	0.201922		0.000460331	0.00503242	0.00163007	0.0841114		0.00129999	0.0123344	0.0196358	0.165689
		3	北市	2东关街道社区卫生服务中心	5030800	0.17	2.633	15	3	6	2	1	3	0.0029524	7.09115e-05	5.69692	88.2353	0.0029624	0.0426985	17.6471	1.13938	0.0242214	0.00156385	35.2941	2.27877	0.0445372	0.00325863	17.6471	1.13938	0.0245283	0.00172518		0.0029524		0.00178541	0.00261264	0.029976	0.204535		0.000480602	0.00482015	0.00211067	0.0889316		0.00129999	0.00370031	0.0209358	0.169389
		3	北市	3五四路社区卫生服务中心	13323127922	0.2	3	24	3	4	1	2	3	0.00336392	8.34253e-05	8	120	0.00416	0.05807	15	1	0.0205882	0.00137254	20	1.33333	0.0252377	0.00190666	15	1	0.020849	0.00151413		0.00336392		0.00182	0.00224261	0.031796	0.206778		0.000496626	0.0139939	0.0026073	0.102925		0.0013619	0.00706422	0.0222977	0.176454
辽宁	辽阳市	1	白塔	1西五道街社区卫生服务中心	0419-2129112	13	13	47	12	19	2	37	39	0.014577	0.00542264	3.61538	3.61538	0.00188	0.00174955	0.923077	0.923077	0.00126696	0.00126696	1.46154	1.46154	0.0018443	0.00208999	3	3	0.00416981	0.0045424		0.014577		0.00182915	0.0022314	0.0336252	0.209009		0.000497823	0.00930683	0.00310512	0.112232		0.00140195	0.0114373	0.0236996	0.187891
		1	白塔	2电校社区卫生服务中心	13504195789	3.6	1.2	5	0	1	0	0	0	0.00134557	0.00150165	4.16667	1.38889	0.00216667	0.000672107	0	0	0	0	0.277778	0.833333	0.000350524	0.00119166	0	0	0	0		0.00134557		0.0018353	0.0114373	0.0354604	0.220446		0.000516491	0.00448522	0.00362161	0.116718		0.00142999	0.00897044	0.0251296	0.196861
		1	白塔	3北园社区卫生服务站	13031750818	1.2	0.8036	4	1	2	1	2	3	0.000901081	0.000500552	4.9776	3.33333	0.00258836	0.00161306	0.833333	1.2444	0.00114379	0.00170799	1.66667	2.4888	0.00210314	0.00355897	2.5	3.7332	0.00347484	0.00565256		0.000901081		0.00187952	0.00930683	0.03734	0.229753		0.000558369	0.00414883	0.00417998	0.120866		0.00142999	0.00224261	0.0265596	0.199104
		2	文圣	1文圣社区卫生服务中心	3222112	16.1	12	62	18	30	1	28	29	0.0134557	0.00671573	5.16667	3.85093	0.00268667	0.00186353	1.11801	1.5	0.00153452	0.00205882	1.86335	2.5	0.00235134	0.00357498	1.80124	2.41667	0.00250361	0.00365915		0.0134557		0.00188	0.014577	0.03922	0.24433		0.000602322	0.0153843	0.0047823	0.136251		0.00145918	0.00109888	0.0280188	0.200203
		2	文圣	2东兴街道太子河社区卫生服务站	13804198155	4	1.74	5	1	2	0	1	1	0.00195107	0.00166851	2.87356	1.25	0.00149425	0.000604896	0.25	0.574713	0.000343136	0.000788818	0.5	1.14943	0.000630943	0.00164367	0.25	0.574713	0.000347484	0.000870191		0.00195107		0.00193818	0.0123344	0.0411582	0.256664		0.000607636	0.00381244	0.00538994	0.140063		0.0014793	0.00650357	0.0294981	0.206706
		2	文圣	3文圣社区卫生服务站	0419-2823120	0.9	1.0252	4	0	2	0	2	2	0.00114956	0.000375414	3.90168	4.44444	0.00202887	0.00215074	0	0	0	0	2.22222	1.95084	0.00280419	0.00278969	2.22222	1.95084	0.00308875	0.00295383		0.00114956		0.0019403	0.00751274	0.0430985	0.264177		0.00062605	0.00370031	0.00601599	0.143763		0.00152127	0.00527013	0.0310193	0.211976
		3	宏伟	1工农街道社区卫生服务中心	5153291	100	12.48	13	3	5	2	4	6	0.0139939	0.0417126	1.04167	0.13	0.000541667	6.29092e-05	0.03	0.240385	4.11763e-05	0.000329938	0.05	0.400641	6.30943e-05	0.000572914	0.06	0.480769	8.33962e-05	0.000727948		0.0139939		0.00199194	0.00556167	0.0450904	0.269739		0.00066644	0.00347605	0.00668243	0.147239		0.00158888	0.00302752	0.0326082	0.215004
		3	宏伟	2长征街道天井园社区卫生服务中心	0419-5155659	1.5	1.99	7	3	1	1	0	1	0.0022314	0.000625689	3.51759	4.66667	0.00182915	0.00225828	2	1.50754	0.00274509	0.00206916	0.666667	0.502513	0.000841258	0.00071859	0.666667	0.502513	0.000926624	0.000760871		0.0022314		0.00201992	0.0112579	0.0471103	0.280997		0.000688655	0.00336392	0.00737108	0.150603		0.00164367	0.00195107	0.0342519	0.216955
		3	宏伟	3荟萃湖社区卫生服务中心	0419-5305120	1.56	2.33	8	2	2	1	1	2	0.00261264	0.000650717	3.43348	5.12821	0.00178541	0.00248162	1.28205	0.858369	0.00175967	0.00117815	1.28205	0.858369	0.0016178	0.00122746	1.28205	0.858369	0.00178197	0.00129968		0.00261264		0.00202887	0.00114956	0.0491392	0.282146		0.000700327	0.0066157	0.00807141	0.157219		0.0017317	0.0111113	0.0359836	0.228066
	大连市	1	中山	1昆明社区卫生服务中心	82641854	3.5	3.3	13	1	3	1	9	10	0.00370031	0.00145994	3.93939	3.71429	0.00204849	0.00179741	0.285714	0.30303	0.000392155	0.000415922	0.857143	0.909091	0.00108162	0.00129999	2.85714	3.0303	0.00397125	0.00458828		0.00370031		0.00204849	0.00370031	0.0511877	0.285847		0.000712401	0.00650357	0.00878381	0.163723		0.00173333	0.0185015	0.0377169	0.246568
		1	中山	2桂林社区卫生服务中心	13940946986	3.8	4.502	27	10	10	4	16	20	0.00504812	0.00158508	5.99733	7.10526	0.00311862	0.00343836	2.63158	2.22124	0.00361196	0.00304874	2.63158	2.22124	0.00332075	0.00317635	5.26316	4.44247	0.00731546	0.00672649		0.00504812		0.00205834	0.00538226	0.053246	0.291229		0.000732611	0.0126483	0.00951642	0.176371		0.00174389	0.00459735	0.0394608	0.251165
		1	中山	3老虎滩工疗社区卫生服务中心	13942846119	34.2	1.3	15	2	4	1	11	12	0.0014577	0.0142657	11.5385	0.438596	0.00600001	0.000212244	0.0584795	1.53846	8.02657e-05	0.00211161	0.116959	3.07692	0.000147589	0.00439998	0.350877	9.23077	0.000487697	0.0139766		0.0014577		0.00212334	0.0269113	0.0553694	0.31814		0.00075126	0.0185015	0.0102677	0.194873		0.00177425	0.00632618	0.0412351	0.257491
		2	西岗	1日新社区卫生服务中心	83635680	1.66	4.35	31	17	13	3	15	18	0.00487768	0.00069243	7.12644	18.6747	0.00370575	0.009037	10.241	3.90805	0.0140562	0.00536396	7.83133	2.98851	0.00988224	0.00427354	10.8434	4.13793	0.0150716	0.00626538		0.00487768		0.00214934	0.0336392	0.0575187	0.351779		0.000760244	0.00609429	0.0110279	0.200967		0.00181999	0.0123344	0.0430551	0.269826
		2	西岗	2人民广场石道街社区卫生服务中心	0411-82471543	5.12	3.5	26	10	11	3	13	16	0.00392457	0.00213569	7.42857	5.07812	0.00386286	0.00245739	1.95312	2.85714	0.00268075	0.00392155	2.14844	3.14286	0.00271108	0.00449427	3.125	4.57143	0.00434355	0.00692175		0.00392457		0.00216667	0.00134557	0.0596854	0.353125		0.000794602	0.00291539	0.0118225	0.203882		0.00182997	0.00613354	0.044885	0.275959
		2	西岗	3人民广场长春路社区卫生服务中心	83685717	2.04	3.0141	21	3	6	2	16	18	0.00337973	0.000850938	6.96725	10.2941	0.00362298	0.0049815	1.47059	0.995322	0.00201845	0.00136612	2.94118	1.99064	0.00371143	0.00284661	8.82353	5.97193	0.0122641	0.0090423		0.00337973		0.00227129	0.00564779	0.0619566	0.358773		0.00083305	0.00556167	0.0126556	0.209444		0.00185159	0.0112579	0.0467366	0.287217
		3	沙河口	1春柳社区卫生服务中心	0411-84409776	2.4	4.3405	26	13	10	1	8	9	0.00486702	0.0010011	5.99009	10.8333	0.00311485	0.00524243	5.41667	2.99505	0.00743461	0.00411083	4.16667	2.30388	0.00525786	0.00329454	3.75	2.07349	0.00521226	0.00313954		0.00486702		0.00229837	0.00482015	0.064255	0.363593		0.000983792	0.00235474	0.0136394	0.211799		0.00190666	0.00336392	0.0486433	0.290581
		3	沙河口	2李家绿波社区卫生服务中心	86844691	9.6	3.7	18	15	7	2	3	5	0.00414883	0.00400441	4.86486	1.875	0.00252973	0.000907344	1.5625	4.05405	0.0021446	0.00556437	0.729167	1.89189	0.000920126	0.00270539	0.520833	1.35135	0.000723925	0.00204613		0.00414883		0.00234427	0.0136799	0.0665993	0.377273		0.000984574	0.0141172	0.0146239	0.225916		0.00198736	0.00564779	0.0506306	0.296229
		3	沙河口	3星海湾花园社区卫生服务中心	84573038	2.2	2.8138	18	7	7	5	1	6	0.00315513	0.000917678	6.39704	8.18182	0.00332647	0.00395932	3.18182	2.48774	0.00436718	0.00341453	3.18182	2.48774	0.00401509	0.00355745	2.72727	2.13235	0.00379074	0.00322866		0.00315513		0.00235425	0.0141172	0.0689535	0.39139		0.00101273	0.0114373	0.0156367	0.237353		0.00201093	0.00717635	0.0526416	0.303405
	葫芦岛市	1	连山	1化机街道社区卫生服务中心	2556588	2.5	2.2	50	2	19	2	16	18	0.00246687	0.00104282	22.7273	20	0.0118182	0.00967834	0.8	0.909091	0.00109803	0.00124777	7.6	8.63636	0.00959034	0.0123499	7.2	8.18182	0.0100075	0.0123884		0.00246687		0.0023964	0.00632618	0.0713499	0.397716		0.00108166	0.00214169	0.0167183	0.239495		0.00201814	0.00556167	0.0546597	0.308967
		1	连山	2渤海街道社区卫生服务中心	2182411	8	4.1	78	10	78	5	40	45	0.00459735	0.00333701	19.0244	9.75	0.00989269	0.00471819	1.25	2.43902	0.00171568	0.00334767	9.75	19.0244	0.0123034	0.0272048	5.625	10.9756	0.00781839	0.0166185		0.00459735		0.00242667	0.00336392	0.0737766	0.40108		0.00114776	0.00201835	0.0178661	0.241513		0.00208541	0.00538226	0.0567451	0.314349
		1	连山	3石油街道社区卫生服务中心	0429-2179965	3	2	60	35	20	7	43	50	0.00224261	0.00125138	30	20	0.0156	0.00967834	11.6667	17.5	0.016013	0.0240195	6.66667	10	0.00841258	0.0142999	16.6667	25	0.0231656	0.0378533		0.00224261		0.0024375	0.00717635	0.0762141	0.408257		0.00116065	0.00997962	0.0190267	0.251493		0.00208999	0.014577	0.0588351	0.328926
		2	龙港	1龙湾街道社区卫生服务中心	0429-3107001	13.3	4.2	49	26	17	13	18	31	0.00470948	0.00554778	11.6667	3.68421	0.00606667	0.00178285	1.95489	6.19048	0.00268317	0.0084967	1.2782	4.04762	0.00161294	0.00578807	2.33083	7.38095	0.0032397	0.0111757		0.00470948		0.00250371	0.00302752	0.0787178	0.411284		0.00118734	0.00195107	0.0202141	0.253444		0.00212978	0.00527013	0.0609649	0.334196
		2	龙港	2望葫社区卫生服务中心	13604290351	20	6	96	42	21	19	18	37	0.00672783	0.00834253	16	4.8	0.00832001	0.0023228	2.1	7	0.00288234	0.0096078	1.05	3.5	0.00132498	0.00500498	1.85	6.16667	0.00257138	0.00933715		0.00672783		0.00250546	0.0123344	0.0812233	0.423618		0.00122731	0.00566259	0.0214414	0.259106		0.00215555	0.00743874	0.0631204	0.341635
		2	龙港	3西街道社区卫生服务中心	2024696	3.5	5	37	5	0	2	15	17	0.00560653	0.00145994	7.4	10.5714	0.003848	0.00511569	1.42857	1	0.00196078	0.00137254	0	0	0	0	4.85714	3.4	0.00675112	0.00514805		0.00560653		0.00252973	0.00414883	0.083753	0.427767		0.0013147	0.0123344	0.0227561	0.271441		0.00218631	0.00220022	0.0653067	0.343835
		3	南票	1三家子街道社区卫生服务中心	0429-4966588	15	2.1	22	1	5	0	4	4	0.00235474	0.00625689	10.4762	1.46667	0.00544763	0.000709745	0.0666667	0.47619	9.15029e-05	0.000653592	0.333333	2.38095	0.000420629	0.00340475	0.266667	1.90476	0.00037065	0.00288406		0.00235474		0.00252973	0.00414883	0.0862827	0.431916		0.0013187	0.00527013	0.0240748	0.276711		0.00219999	0.0014577	0.0675067	0.345293
		3	南票	2九龙街道社区卫生服务中心	2940378	30	3.5	56	5	11	1	33	34	0.00392457	0.0125138	16	1.86667	0.00832001	0.000903311	0.166667	1.42857	0.000228757	0.00196078	0.366667	3.14286	0.000462692	0.00449427	1.13333	9.71429	0.00157526	0.0147087		0.00392457		0.002548	0.0112131	0.0888307	0.443129		0.00135384	0.00171111	0.0254286	0.278422		0.00225765	0.0021307	0.0697644	0.347424
		3	南票	3邱皮沟街道社区卫生服务中心	15042985538	40	2.5	21	0	5		5	5	0.00280326	0.0166851	8.4	0.525	0.00436801	0.000254056	0	0	0	0	0.125	2	0.000157736	0.00285999	0.125	2	0.000173742	0.00302827		0.00280326		0.00257426	0.00566259	0.091405	0.448792		0.00141262	0.00655963	0.0268413	0.284982		0.00225788	0.00213048	0.0720223	0.349554
浙江	杭州	1	西湖	1南湲街道社区卫生服务中心	88848591	3.02	12.2	55	28	25	3	20	23	0.0136799	0.00125972	4.5082	18.2119	0.00234427	0.00881306	9.27152	2.29508	0.0127256	0.0031501	8.27815	2.04918	0.0104461	0.00293032	7.61589	1.88525	0.0105856	0.00285451		0.0136799		0.00258668	0.00743874	0.0939917	0.45623		0.00147569	0.00470948	0.0283169	0.289691		0.00226983	0.00141284	0.0742921	0.350967
		1	西湖	2袁浦社区卫生服务中心	87643921	26.7	3.2457	46	19	13	1	11	12	0.00363942	0.0111373	14.1726	1.72285	0.00736976	0.000833714	0.71161	5.8539	0.000976716	0.00803473	0.486891	4.0053	0.000614402	0.00572755	0.449438	3.6972	0.000624691	0.00559805		0.00363942		0.00258836	0.000901081	0.09658	0.457132		0.00161496	0.0200822	0.0299319	0.309773		0.00226983	0.00141284	0.0765619	0.35238
		1	西湖	3留下街道社区卫生服务中心	85223611	4.5	11.9959	81	36	33	5	41	46	0.0134511	0.00187707	6.75231	18	0.0035112	0.0087105	8	3.00103	0.0109803	0.00411904	7.33333	2.75094	0.00925383	0.00393383	10.2222	3.83464	0.0142082	0.00580616		0.0134511		0.00265306	0.00109888	0.0992331	0.45823		0.00162674	0.00427217	0.0315586	0.314046		0.00231891	0.00414883	0.0788808	0.356529
		2	上城	1紫阳街道社区卫生服务中心	86065282	3.49	7.26	125	43	56	7	34	41	0.00814067	0.00145577	17.2176	35.8166	0.00895318	0.0173323	12.3209	5.92287	0.016911	0.00812939	16.0458	7.7135	0.020248	0.0110303	11.7479	5.64738	0.0163288	0.00855089		0.00814067		0.00266342	0.00459735	0.101897	0.462828		0.00163965	0.00141284	0.0331983	0.315458		0.00239099	0.0026825	0.0812718	0.359211
		2	上城	2南星街道社区卫生服务中心	86068986	4.31	3.5345	163	57	57	8	57	65	0.00396325	0.00179781	46.1168	37.819	0.0239808	0.0183013	13.2251	16.1268	0.018152	0.0221347	13.2251	16.1268	0.0166885	0.0230612	15.0812	18.3902	0.0209619	0.0278451		0.00396325		0.00267879	0.00370031	0.104575	0.466528		0.00165277	0.00140163	0.0348511	0.31686		0.00248695	0.002579	0.0837588	0.36179
		2	上城	3小荔维区社区卫生服务中心	87838718	2.7	8.73414	126	43	62	4	25	29	0.00979364	0.00112624	14.4261	46.6667	0.00750161	0.0225828	15.9259	4.92321	0.021859	0.00675732	22.963	7.09858	0.0289767	0.0101509	10.7407	3.3203	0.0149289	0.00502738		0.00979364		0.00268667	0.0134557	0.107262	0.479984		0.00175827	0.00527013	0.0366093	0.32213		0.002495	0.00578403	0.0862538	0.367574
		3	江干	1系莎街道社区卫生服务中心	0571-86981780	5.5	7.0654	72	40	48	6	24	30	0.00792247	0.00229419	10.1905	13.0909	0.00529907	0.00633491	7.27273	5.66139	0.00998213	0.00777051	8.72727	6.79367	0.0110128	0.00971491	5.45455	4.24604	0.00758147	0.00642907		0.00792247		0.00273656	0.0021307	0.109999	0.482114		0.00177336	0.00261264	0.0383827	0.324743		0.00252352	0.00190622	0.0887773	0.36948
		3	江干	2闸弄口街道社区卫生服务中心	86416008	8	8.5	87	46	44	1	13	14	0.00953109	0.00333701	10.2353	10.875	0.00532236	0.0052626	5.75	5.41176	0.00789212	0.00742788	5.5	5.17647	0.00694038	0.00740232	1.75	1.64706	0.00243239	0.00249387		0.00953109		0.00282264	0.00578403	0.112821	0.487898		0.00179649	0.005158	0.0401792	0.329901		0.00259999	0.00370031	0.0913773	0.373181
		3	江干	3彭埠镇社区卫生服务中心	86492249	17.76	19.5	125	41	65	5	47	52	0.0218654	0.00740816	6.41026	7.03829	0.00333334	0.00340595	2.30856	2.10256	0.0031686	0.00288586	3.65991	3.33333	0.00461839	0.00476665	2.92793	2.66667	0.00406963	0.00403769		0.0218654		0.00288889	0.00141284	0.11571	0.489311		0.00179962	0.00128726	0.0419788	0.331188		0.00262729	0.00427217	0.0940046	0.377453
	绍兴市	1	越城	1塔山街道社区卫生服务中心	0575-88098198	8	6.7	25	8	13	0	7	7	0.00751274	0.00333701	3.73134	3.125	0.0019403	0.00151224	1	1.19403	0.00137254	0.00163886	1.625	1.9403	0.00205057	0.00277461	0.875	1.04478	0.00121619	0.00158193		0.00751274		0.00288889	0.00141284	0.118599	0.490724		0.00180697	0.00384608	0.0437858	0.335034		0.00268124	0.00358818	0.0966858	0.381041
		1	越城	2府山街道社区卫生服务中心	85141384	14.82	9.7	60	20	27	0	14	14	0.0108767	0.00618181	6.18557	4.04858	0.0032165	0.00195918	1.34953	2.06186	0.00185229	0.00282999	1.82186	2.78351	0.00229898	0.0039804	0.944669	1.4433	0.00131303	0.00218535		0.0108767		0.00290589	0.00381244	0.121505	0.494537		0.00183094	0.00632618	0.0456167	0.34136		0.00270539	0.00414883	0.0993912	0.38519
		1	越城	3城南街道社区卫生服务中心	0575-88062536	12.5	4.32	68	21	34	2	16	18	0.00484404	0.00521408	15.7407	5.44	0.00818519	0.00263251	1.68	4.86111	0.00230587	0.00667209	2.72	7.87037	0.00343233	0.0112546	1.44	4.16667	0.00200151	0.00630889		0.00484404		0.0029151	0.00220022	0.12442	0.496737		0.00185196	0.0112579	0.0474687	0.352618		0.0027238	0.00470948	0.102115	0.389899
	舟山市	1	普陀	1展茂中心卫生院	6022322	33.45	2.2635	19	7	9	0	0	0	0.00253807	0.0139529	8.39408	0.568012	0.00436493	0.000274871	0.209268	3.09256	0.000287229	0.00424467	0.269058	3.97614	0.000339521	0.00568586	0	0	0	0		0.00253807		0.0029624	0.0029524	0.127382	0.499689		0.00187815	0.00246687	0.0493468	0.355085		0.00277461	0.00751274	0.10489	0.397412
		1	普陀	2勾山街道社区卫生服务中心	3096902	44.1	5	37	5	13	0	10	10	0.00560653	0.0183953	7.4	0.839002	0.003848	0.000406007	0.113379	1	0.000155617	0.00137254	0.294785	2.6	0.000371985	0.00371798	0.226757	2	0.000315178	0.00302827		0.00560653		0.00300263	0.00427217	0.130385	0.503961		0.00190704	0.014577	0.0512539	0.369662		0.00278969	0.00114956	0.107679	0.398562
		1	普陀	3东港街道社区卫生服务中心	0580-3826339	18.28	4.6	31	4	13	0	5	5	0.005158	0.00762507	6.73913	1.69584	0.00350435	0.000820647	0.218818	0.869565	0.000300338	0.00119352	0.71116	2.82609	0.000897403	0.00404129	0.273523	1.08696	0.00038018	0.0016458		0.005158		0.00300947	0.0114311	0.133394	0.515393		0.00193684	0.00358818	0.0531907	0.37325		0.00281126	0.00171111	0.110491	0.400273
		2	定海	1盐仑街道卫生院	0580-8890289	33.4	3.43	33	3	11	0	8	8	0.00384608	0.013932	9.62099	0.988024	0.00500292	0.000478121	0.0898204	0.874636	0.000123282	0.00120048	0.329341	3.207	0.000415591	0.00458599	0.239521	2.33236	0.000332919	0.0035315		0.00384608		0.00305883	0.00190622	0.136453	0.517299		0.00193684	0.00358818	0.0551276	0.376838		0.00283167	0.00566259	0.113322	0.405935
		2	定海	2白泉中心卫生院	0580-8070315	62.5	3.0066	50	9	15	0	12	12	0.00337132	0.0260704	16.6301	0.8	0.00864765	0.000387133	0.144	2.99341	0.000197646	0.00410859	0.24	4.98902	0.000302853	0.00713427	0.192	3.99122	0.000266868	0.00604323		0.00337132		0.0030919	0.00414883	0.139545	0.521448		0.00201557	0.00459735	0.0571431	0.381436		0.00284548	0.00338107	0.116168	0.409317
		2	定海	3城市中心社区卫生服务中心	2063676	63.065	12.59	57	6	28	2	16	18	0.0141172	0.0263061	4.5274	0.903829	0.00235425	0.000437378	0.0951399	0.476569	0.000130584	0.000654111	0.443986	2.22399	0.00056026	0.00318029	0.28542	1.42971	0.000396715	0.00216476		0.0141172		0.00310053	0.00282087	0.142646	0.524268		0.00205548	0.00338107	0.0591986	0.384817		0.00284661	0.00337973	0.119014	0.412696
福建	福州市	1	鼓楼	1华大街道社区卫生服务中心	87833735	3.349	1.1123	44	5	15	0	8	8	0.00124723	0.00139696	39.5577	13.1383	0.02057	0.00635782	1.49298	4.49519	0.00204918	0.00616984	4.47895	13.4856	0.00565193	0.0192843	2.38877	7.1923	0.00332024	0.0108901		0.00124723		0.00311485	0.00486702	0.145761	0.529135		0.0020563	0.00337973	0.0612549	0.388197		0.00285999	0.00224261	0.121874	0.414939
		1	鼓楼	2南街街道社区卫生服务中心	0591-87622191	1.544	6.634	33	13	10	3	8	11	0.00743874	0.000644043	4.97437	21.3731	0.00258668	0.0103428	8.41969	1.9596	0.0115564	0.00268964	6.47668	1.50739	0.00817284	0.00215555	7.12435	1.65812	0.0099024	0.00251062		0.00743874		0.00311862	0.00504812	0.148879	0.534184		0.00206596	0.00336392	0.0633209	0.391561		0.00285999	0.00280326	0.124734	0.417742
		1	鼓楼	3华大街道体育中心社区卫生服务中心	87728590	1.52	0.5759	8	2	4	1	0	1	0.00064576	0.000634032	13.8913	5.26316	0.00722348	0.00254693	1.31579	3.47283	0.00180598	0.0047666	2.63158	6.94565	0.00332075	0.00993224	0.657895	1.73641	0.000914432	0.00262916		0.00064576		0.00312	0.000560653	0.151999	0.534744		0.00206596	0.00560653	0.0653868	0.397167		0.00285999	0.00560653	0.127594	0.423349
		2	台江	1苍霞街道社区卫生服务中心	83219301	1.07	4.9941	41	7	14	1	4	5	0.00559991	0.000446325	8.20969	38.3178	0.00426904	0.0185426	6.54206	1.40165	0.00897926	0.00192383	13.0841	2.80331	0.0165107	0.00400871	4.6729	1.00118	0.00649503	0.00151592		0.00559991		0.00314094	0.00334149	0.15514	0.538086		0.00206596	0.00560653	0.0674528	0.402774		0.00285999	0.000560653	0.130454	0.423909
		2	台江	2瀛洲街道社区卫生服务中心	0591-83201230	1.3	5.47	34	10	7	1	3	4	0.00613354	0.000542264	6.21572	26.1538	0.00323218	0.0126563	7.69231	1.82815	0.010558	0.00250922	5.38462	1.27971	0.00679477	0.00182997	3.07692	0.731261	0.00427673	0.00110723		0.00613354		0.00315152	0.00370031	0.158292	0.541786		0.00210813	0.00109888	0.0695609	0.403872		0.00293032	0.0136799	0.133385	0.437589
		2	台江	3义洲街道保兴社区卫生服务中心	0591-83181324	0.766	1.25	15	1	6	0	3	3	0.00140163	0.000319519	12	19.5822	0.00624001	0.00947618	1.30548	0.8	0.00179183	0.00109803	7.8329	4.8	0.00988423	0.00686397	3.91645	2.4	0.00544362	0.00363392		0.00140163		0.0032165	0.0108767	0.161508	0.552663		0.00214248	0.0151376	0.0717034	0.41901		0.00300299	0.0112131	0.136388	0.448802
		3	仓山	1上渡社区卫生服务中心	0591-83512361	4.9	5	55	9	23		8	8	0.00560653	0.00204392	11	11.2245	0.00572001	0.00543172	1.83673	1.8	0.002521	0.00247058	4.69388	4.6	0.00592314	0.00657797	1.63265	1.6	0.00226928	0.00242261		0.00560653		0.00323218	0.00613354	0.16474	0.558796		0.00217447	0.0021307	0.0738779	0.421141		0.00305065	0.0336392	0.139438	0.482441
		3	仓山	2临江街道社区卫生服务中心	0591-88250306	2.76	5.1583	28	6	9	1	6	7	0.00578403	0.00115127	5.42814	10.1449	0.00282264	0.0049093	2.17391	1.16317	0.00298379	0.00159651	3.26087	1.74476	0.00411485	0.002495	2.53623	1.35704	0.0035252	0.00205473		0.00578403		0.00325	0.00358818	0.16799	0.562384		0.00221239	0.00628256	0.0760903	0.427423		0.00310868	0.002579	0.142547	0.48502
		3	仓山	3金山街道社区卫生服务中心	13763863261	1.5	0.95	10	2	5	1	3	4	0.00106524	0.000625689	10.5263	6.66667	0.00547369	0.00322611	1.33333	2.10526	0.00183006	0.00288956	3.33333	5.26316	0.00420629	0.00752628	2.66667	4.21053	0.0037065	0.00637529		0.00106524		0.00326046	0.0026825	0.171251	0.565067		0.00229552	0.00302752	0.0783858	0.430451		0.00314599	0.0112131	0.145693	0.496233
	莆田	1	荔城	1镇海社区卫生服务中心	2292545	7.5	4.96	19	1	7	4	2	6	0.00556167	0.00312845	3.83065	2.53333	0.00199194	0.00122592	0.133333	0.201613	0.000183006	0.000276722	0.933333	1.41129	0.00117776	0.00201814	0.8	1.20968	0.00111195	0.00183161		0.00556167		0.00326702	0.00214169	0.174518	0.567209		0.00229552	0.00706422	0.0806813	0.437515		0.00317635	0.00504812	0.148869	0.501282
		1	荔城	2凤山社区卫生服务中心	13859816268	7.5	4.96	7	2	4	1	1	2	0.00556167	0.00312845	1.41129	0.933333	0.000733872	0.000451656	0.266667	0.403226	0.000366012	0.000553445	0.533333	0.806452	0.000673006	0.00115322	0.266667	0.403226	0.00037065	0.000610537		0.00556167		0.00327097	0.00695209	0.177789	0.574161		0.00235393	0.0029524	0.0830352	0.440467		0.00318029	0.0141172	0.15205	0.515399
		1	荔城	3拱辰社区卫生服务中心	0594-6902520	30	4.8	19	1	7	5	3	8	0.00538226	0.0125138	3.95833	0.633333	0.00205834	0.000306481	0.0333333	0.208333	4.57514e-05	0.000285947	0.233333	1.45833	0.00029444	0.00208541	0.266667	1.66667	0.00037065	0.00252355		0.00538226		0.00332647	0.00315513	0.181115	0.577316		0.00240308	0.00578403	0.0854383	0.446252		0.00325863	0.0029524	0.155308	0.518351
		2	城厢	1凤凰山社区卫生服务中心	13607523338	21.1	4.4	38	9	19	2	12	14	0.00493374	0.00880136	8.63636	1.80095	0.00449091	0.000871509	0.42654	2.04545	0.000585445	0.00280748	0.900474	4.31818	0.0011363	0.00617497	0.663507	3.18182	0.000922233	0.00481769		0.00493374		0.00333334	0.0218654	0.184449	0.599181		0.00243055	0.00190622	0.0878688	0.448158		0.00329454	0.00486702	0.158603	0.523218
		2	城厢	2霞林街道社区卫生服务中心	0594-2523986	17	2.7	13	3	3	0	0	0	0.00302752	0.00709115	4.81481	0.764706	0.00250371	0.000370054	0.176471	1.11111	0.000242214	0.00152505	0.176471	1.11111	0.000222686	0.00158888	0	0	0	0		0.00302752		0.00339131	0.002579	0.18784	0.60176		0.00245948	0.00565138	0.0903283	0.453809		0.00332657	0.00482015	0.161929	0.528038
		2	城厢	3龙桥街道社区卫生服务中心	0594-2681312	19	4.6	15	0	4	1	3	4	0.005158	0.0079254	3.26087	0.789474	0.00169565	0.00038204	0	0	0	0	0.210526	0.869565	0.00026566	0.00124347	0.210526	0.869565	0.000292618	0.00131664		0.005158		0.00341177	0.00991234	0.191252	0.611673		0.00246368	0.00282087	0.092792	0.45663		0.00333665	0.00336392	0.165266	0.531402
		3	秀屿	1笏石社区卫生服务中心	13950790139	100	16.5	46	6	20	6	10	16	0.0185015	0.0417126	2.78788	0.46	0.0014497	0.000222602	0.06	0.363636	8.23526e-05	0.000499107	0.2	1.21212	0.000252377	0.00173333	0.16	0.969697	0.00022239	0.00146825		0.0185015		0.00346667	0.00235474	0.194718	0.614027		0.00246682	0.00751274	0.0952588	0.464143		0.00333665	0.00336392	0.168603	0.534766
	南平	1	浦城县	1河滨街道社区卫生服务中心	0599-2822097	24.5	3.7	18	1	6	1	6	7	0.00414883	0.0102196	4.86486	0.734694	0.00252973	0.000355531	0.0408163	0.27027	5.60222e-05	0.000370958	0.244898	1.62162	0.000309033	0.00231891	0.285714	1.89189	0.000397125	0.00286458		0.00414883		0.00350435	0.005158	0.198223	0.619185		0.00257089	0.000901081	0.0978297	0.465044		0.00336651	0.0114311	0.171969	0.546197
		1	浦城县	2南浦街道社区卫生服务中心	0599-2838938	13.68	3.4	23	1	9	1	8	9	0.00381244	0.00570629	6.76471	1.68129	0.00351765	0.000813603	0.0730994	0.294118	0.000100332	0.000403689	0.657895	2.64706	0.000830189	0.00378528	0.657895	2.64706	0.000914432	0.004008		0.00381244		0.0035112	0.0134511	0.201734	0.632636		0.00258245	0.00897044	0.100412	0.474014		0.00340475	0.00235474	0.175374	0.548552
		2	延平	1玉屏山社区卫生服务中心	0599-8693021	5	1.26	7	0	2	0	0	0	0.00141284	0.00208563	5.55556	1.4	0.00288889	0.000677484	0	0	0	0	0.4	1.5873	0.000504755	0.00226983	0	0	0	0		0.00141284		0.00351765	0.00381244	0.205252	0.636449		0.00262941	0.0123344	0.103042	0.486349		0.0035154	0.0269113	0.178889	0.575463
		2	延平	2水东街道社区卫生服务中心	0599-8689659	80	4.2	30	3	8	1	10	11	0.00470948	0.0333701	7.14286	0.375	0.00371429	0.000181469	0.0375	0.714286	5.14704e-05	0.000980388	0.1	1.90476	0.000126189	0.0027238	0.1375	2.61905	0.000191116	0.00396559		0.00470948		0.00352675	0.00628256	0.208778	0.642731		0.00266576	0.00695209	0.105707	0.493301		0.00355745	0.00315513	0.182447	0.578619
		2	延平	3黄墩街道社区卫生服务中心	0599-8808665	43	2.45	35	0	12	4	15	19	0.0027472	0.0179364	14.2857	0.813953	0.00742858	0.000393886	0	0	0	0	0.27907	4.89796	0.000352154	0.00700405	0.44186	7.7551	0.000614158	0.0117423		0.0027472		0.00355909	0.00327657	0.212337	0.646008		0.00269474	0.002579	0.108402	0.49588		0.00355897	0.000901081	0.186006	0.57952
		3	邵武市	1昭阳街道社区卫生服务中心	0599-6221117	8	3.1	24	1	8	1	6	7	0.00347605	0.00333701	7.74194	3	0.00402581	0.00145175	0.125	0.322581	0.000171568	0.000442756	1	2.58065	0.00126189	0.00369031	0.875	2.25806	0.00121619	0.00341901		0.00347605		0.00362298	0.00337973	0.21596	0.649388		0.00271034	0.0111113	0.111112	0.506991		0.00357498	0.000897044	0.189581	0.580417
		3	邵武市	2水北街道社区卫生服务中心	13509538858	7	5	37	0	10	0	4	4	0.00560653	0.00291988	7.4	5.28571	0.003848	0.00255785	0	0	0	0	1.42857	2	0.0018027	0.00285999	0.571429	0.8	0.000794249	0.00121131		0.00560653		0.00364	0.00448522	0.2196	0.653873		0.00275462	0.00336392	0.113867	0.510355		0.00357498	0.0134557	0.193156	0.593872
		3	邵武市	3通泰街道社区卫生服务中心	0599-6322475	16.73	3.9	41	0	11	2	3	5	0.00437309	0.00697852	10.5128	2.45069	0.00546667	0.00118593	0	0	0	0	0.657501	2.82051	0.000829692	0.00403332	0.298864	1.28205	0.000415402	0.0019412		0.00437309		0.00370575	0.00487768	0.223306	0.658751		0.00289577	0.00559991	0.116763	0.515955		0.00357498	0.00224261	0.196731	0.596115
山东	济南	1	天桥	1制锦市办事处社区卫生服务中心	15953144231	0.7	0.7	16	0	6	1	6	7	0.000784914	0.000291988	22.8571	22.8571	0.0118857	0.011061	0	0	0	0	8.57143	8.57143	0.0108162	0.0122571	10	10	0.0138994	0.0151413		0.000784914		0.00371429	0.00470948	0.22702	0.66346		0.00295138	0.00392457	0.119714	0.519879		0.00369031	0.00347605	0.200421	0.599591
		1	天桥	2北园街道办事处社区卫生服务站	85909618	5.3	3.81	22	3	7	0	3	3	0.00427217	0.00221077	5.77428	4.15094	0.00300263	0.00200871	0.566038	0.787402	0.000776911	0.00108074	1.32075	1.83727	0.00166664	0.00262729	0.566038	0.787402	0.000786756	0.00119223		0.00427217		0.00374837	0.00171111	0.230769	0.665171		0.00295138	0.00235474	0.122666	0.522234		0.00371798	0.00560653	0.204139	0.605198
		1	天桥	3工人新村北村街道办事处	85940242	2.8	2.16	35	14	9	9	11	20	0.00242202	0.00116795	16.2037	12.5	0.00842594	0.00604896	5	6.48148	0.00686272	0.00889611	3.21429	4.16667	0.00405606	0.00595831	7.14286	9.25926	0.00992812	0.0140197		0.00242202		0.003848	0.00560653	0.234617	0.670778		0.00303818	0.00381244	0.125704	0.526047		0.00374344	0.00214169	0.207882	0.607339
		2	槐荫	1匡山办事处社区卫生服务中心	66905922	5.71	2	24	9	5	3	11	14	0.00224261	0.00238179	12	4.20315	0.00624001	0.00203398	1.57618	4.5	0.00216338	0.00617645	0.875657	2.5	0.00110498	0.00357498	2.45184	7	0.0034079	0.0105989		0.00224261		0.003848	0.00560653	0.238465	0.676384		0.00309895	0.0134557	0.128803	0.539502		0.00378528	0.00381244	0.211668	0.611152
		2	槐荫	2青年公园办事处岔路街社区卫生	87940349	0.75	1.91	12	1	5	1	4	5	0.00214169	0.000312845	6.28272	16	0.00326702	0.00774267	1.33333	0.52356	0.00183006	0.000718609	6.66667	2.6178	0.00841258	0.00374344	6.66667	2.6178	0.00926624	0.0039637		0.00214169		0.003848	0.00560653	0.242313	0.681991		0.00309895	0.00224261	0.131902	0.541745		0.00378528	0.00381244	0.215453	0.614964
		2	槐荫	3道德街办事处新世界阳光社区	0531-8716706	0.62	1.2	19	6	7	3	6	9	0.00134557	0.000258618	15.8333	30.6452	0.00823334	0.0148297	9.67742	5	0.0132827	0.00686272	11.2903	5.83333	0.0142471	0.00834163	14.5161	7.5	0.0201765	0.011356		0.00134557		0.00386286	0.00392457	0.246176	0.685915		0.00309895	0.0269113	0.135001	0.568656		0.00386485	0.00414883	0.219318	0.619113
		3	历下	1原城路办事处芙蓉街道社区	13001706449	0.8	1.3	14	3	2	1	2	3	0.0014577	0.000333701	10.7692	17.5	0.00560001	0.00846855	3.75	2.30769	0.00514704	0.00316741	2.5	1.53846	0.00315472	0.00219999	3.75	2.30769	0.00521226	0.00349415		0.0014577		0.00391281	0.0102823	0.250088	0.696198		0.00311452	0.0022314	0.138115	0.570888		0.00391109	0.00655963	0.223229	0.625673
		3	历下	2东关办事处社区卫生服务中心	13145475047	3	1.8	17	1	1	2	3	5	0.00201835	0.00125138	9.44444	5.66667	0.00491112	0.0027422	0.333333	0.555556	0.000457514	0.000762524	0.333333	0.555556	0.000420629	0.000794441	1.66667	2.77778	0.00231656	0.00420592		0.00201835		0.00400441	0.00713486	0.254093	0.703332		0.00315418	0.0102823	0.141269	0.58117		0.00393383	0.0134511	0.227163	0.639124
		3	历下	3燕山办事处社区卫生服务中心	88520281	3	2.12	22	8	8	6	8	14	0.00237717	0.00125138	10.3774	7.33333	0.00539623	0.00354872	2.66667	3.77358	0.00366012	0.00517941	2.66667	3.77358	0.00336503	0.0053962	4.66667	6.60377	0.00648637	0.00999899		0.00237717		0.00402381	0.00565138	0.258117	0.708984		0.00317841	0.0014577	0.144448	0.582628		0.0039722	0.00565138	0.231135	0.644775
	济宁	1	市中	1山推社区卫生服务中心	2909100	8	3.5	70	8	20	6	31	37	0.00392457	0.00333701	20	8.75	0.0104	0.00423427	1	2.28571	0.00137254	0.00313724	2.5	5.71429	0.00315472	0.00817139	4.625	10.5714	0.00642846	0.0160065		0.00392457		0.00402581	0.00347605	0.262142	0.71246		0.00330554	0.0336392	0.147753	0.616267		0.0039804	0.0108767	0.235115	0.655652
		1	市中	2电力社区卫生服务中心	0537-2163887	3.2	3.864	49	16	13	2	13	15	0.00433272	0.0013348	12.6812	15.3125	0.00659421	0.00740998	5	4.14079	0.00686272	0.00568341	4.0625	3.36439	0.00512641	0.00481106	4.6875	3.88199	0.00651533	0.00587784		0.00433272		0.00416	0.00224261	0.266302	0.714702		0.0033322	0.00695209	0.151085	0.623219		0.00400871	0.00559991	0.239124	0.661252
		1	市中	3樱花社区卫生服务中心	0537-2388651	6	3	29	4	7	2	8	10	0.00336392	0.00250276	9.66667	4.83333	0.00502667	0.00233893	0.666667	1.33333	0.000915029	0.00183006	1.16667	2.33333	0.0014722	0.00333665	1.66667	3.33333	0.00231656	0.00504711		0.00336392		0.00416	0.00336392	0.270462	0.718066		0.00371874	0.00560653	0.154804	0.628825		0.00403332	0.00437309	0.243157	0.665625
		2	任城	1众和社区卫生服务中心	2173156	8	5.85	62	4	16	4	6	10	0.00655963	0.00333701	10.5983	7.75	0.00551112	0.00375036	0.5	0.683761	0.000686272	0.000938491	2	2.73504	0.00252377	0.00391109	1.25	1.7094	0.00173742	0.00258826		0.00655963		0.00417306	0.00153697	0.274636	0.719603		0.0037563	0.00370031	0.15856	0.632526		0.00404129	0.005158	0.247199	0.670783
		2	任城	2鲁抗社区卫生服务中心	0537-2983120	6	6.2	65	8	23	5	34	39	0.00695209	0.00250276	10.4839	10.8333	0.00545162	0.00524243	1.33333	1.29032	0.00183006	0.00177102	3.83333	3.70968	0.00483723	0.00530482	6.5	6.29032	0.00903459	0.00952438		0.00695209		0.00420118	0.00499642	0.278837	0.7246		0.0037769	0.00613354	0.162337	0.638659		0.0040857	0.00235474	0.251284	0.673137
		2	任城	3永康社区卫生服务中心	13792386376	19.6	5.04	39	6	14	1	6	7	0.00565138	0.00817568	7.7381	1.9898	0.00402381	0.000962896	0.306122	1.19048	0.000420166	0.00163398	0.714286	2.77778	0.000901348	0.0039722	0.357143	1.38889	0.000496406	0.00210296		0.00565138		0.00426904	0.00559991	0.283106	0.7302		0.00389621	0.00713486	0.166234	0.645794		0.00415159	0.00695209	0.255436	0.680089
	滨州	1	滨城	1市中心街道办事处社区	0543-3321120	1.4	1.4	44	10	11	4	17	21	0.00156983	0.000583977	31.4286	31.4286	0.0163429	0.0152088	7.14286	7.14286	0.00980388	0.00980388	7.85714	7.85714	0.00991482	0.0112357	15	15	0.020849	0.022712		0.00156983		0.00428236	0.00381244	0.287388	0.734012		0.00404847	0.00743874	0.170282	0.653233		0.00417303	0.00153697	0.259609	0.681626
		1	滨城	2市西办事处春晖社区	3261115	2	0.98	5	1	1	0	0	0	0.00109888	0.000834253	5.10204	2.5	0.00265306	0.00120979	0.5	1.02041	0.000686272	0.00140055	0.5	1.02041	0.000630943	0.00145918	0	0	0	0		0.00109888		0.00431135	0.00338107	0.291699	0.737393		0.00410174	0.00564779	0.174384	0.658881		0.00420586	0.00190622	0.263815	0.683533
		1	滨城	3北镇街道办事处天虹社区	13031000006	1	0.14	4	1	2	0	0	0	0.000156983	0.000417126	28.5714	4	0.0148572	0.00193567	1	7.14286	0.00137254	0.00980388	2	14.2857	0.00252377	0.0204285	0	0	0	0		0.000156983		0.00436493	0.00253807	0.296064	0.739931		0.00413193	0.0112131	0.178516	0.670094		0.00427354	0.00487768	0.268088	0.68841
湖南	长沙	1	雨花	1侯家塘社区卫生服务中心	13908472820	1.72	6.3	19	7	6	2	2	4	0.00706422	0.000717457	3.01587	11.0465	0.00156826	0.00534559	4.06977	1.11111	0.00558593	0.00152505	3.48837	0.952381	0.00440193	0.0013619	2.32558	0.634921	0.00323241	0.000961354		0.00706422		0.00436801	0.00280326	0.300432	0.742735		0.00415966	0.00334149	0.182675	0.673435		0.00428998	0.00448522	0.272378	0.692896
		1	雨花	2洞井社区卫生服务中心	85636019	1.76	11	41	14	10	1	1	2	0.0123344	0.000734142	3.72727	23.2955	0.00193818	0.0112731	7.95455	1.27273	0.010918	0.00174687	5.68182	0.909091	0.00716981	0.00129999	1.13636	0.181818	0.00157947	0.000275297		0.0123344		0.00449091	0.00493374	0.304923	0.747668		0.00422584	0.00493374	0.186901	0.678369		0.00431877	0.00334149	0.276697	0.696237
		1	雨花	3雨花亭街道社区卫生服务中心	85581337	20	17.9097	49	14	12	2	6	8	0.0200822	0.00834253	2.73595	2.45	0.00142269	0.0011856	0.7	0.781699	0.00096078	0.00107292	0.6	0.670028	0.000757132	0.000958136	0.4	0.446685	0.000555975	0.000676341		0.0200822		0.00455001	0.000897044	0.309473	0.748565		0.00425972	0.0108767	0.191161	0.689245		0.00436763	0.00991234	0.281065	0.706149
		2	天心	1坡子街街道社区卫生服务中心	82259910	0.98	4.1	21	4	5	0	6	6	0.00459735	0.000408784	5.12195	21.4286	0.00266342	0.0103696	4.08163	0.97561	0.00560222	0.00133907	5.10204	1.21951	0.0064382	0.00174389	6.12245	1.46341	0.00850982	0.0022158		0.00459735		0.00468001	0.00336392	0.314153	0.751929		0.00434382	0.0218654	0.195505	0.711111		0.00439998	0.0014577	0.285465	0.707607
		2	天心	2书院路街道社区卫生服务中心	85123377	0.96	3.4	19	5	9	0	7	7	0.00381244	0.000400441	5.58824	19.7917	0.00290589	0.00957752	5.20833	1.47059	0.00714866	0.00201845	9.375	2.64706	0.0118302	0.00378528	7.29167	2.05882	0.010135	0.00311733		0.00381244		0.00476667	0.00134557	0.31892	0.753275		0.0043494	0.00106524	0.199854	0.712176		0.00449427	0.00392457	0.289959	0.711532
		2	天心	3新铺社区卫生服务中心	13787206297	12.8	10.2	36	5	10	2	2	4	0.0114373	0.00533922	3.52941	2.8125	0.0018353	0.00136102	0.390625	0.490196	0.00053615	0.000672815	0.78125	0.980392	0.000985849	0.00140195	0.3125	0.392157	0.000434355	0.000593777		0.0114373		0.00491112	0.00201835	0.323831	0.755293		0.00444042	0.00991234	0.204295	0.722089		0.00449427	0.00392457	0.294453	0.715456
		3	岳麓	1望月湖社区卫生服务中心	0731-88866892	1.57	4.1	74	13	18	1	14	15	0.00459735	0.000654888	18.0488	47.1338	0.00938538	0.0228088	8.28025	3.17073	0.011365	0.00435197	11.465	4.39024	0.0144675	0.00627802	9.55414	3.65854	0.0132796	0.00553951		0.00459735		0.00497392	0.002579	0.328805	0.757872		0.0045193	0.00358818	0.208814	0.725677		0.00458599	0.00384608	0.299039	0.719302
		3	岳麓	2望岳社区卫生服务中心	0731-82353227	11.7	3.0153	25	3	6	1	2	3	0.00338107	0.00488038	8.29105	2.13675	0.00431135	0.00103401	0.25641	0.994926	0.000351934	0.00136558	0.512821	1.98985	0.000647121	0.00284548	0.25641	0.994926	0.000356394	0.00150645		0.00338107		0.00500001	0.00291539	0.333805	0.760788		0.00458899	0.00504812	0.213403	0.730725		0.00459403	0.00628256	0.303633	0.725585
		3	岳麓	3银盆岭社区卫生服务中心	0731-88809510	7.7	5.6418	26	5	7	1	4	5	0.00632618	0.00321187	4.60846	3.37662	0.0023964	0.00163401	0.649351	0.886242	0.000891262	0.00121641	0.909091	1.24074	0.00114717	0.00177425	0.649351	0.886242	0.000902556	0.00134189		0.00632618		0.00500292	0.00384608	0.338808	0.764634		0.00459103	0.00201835	0.217994	0.732743		0.00476665	0.0218654	0.3084	0.74745
	郴州	1	北湖	1燕泉街道社区卫生服务中心	13272394429	15.8	11.28	26	4	4	0	4	4	0.0126483	0.0065906	2.30496	1.64557	0.00119858	0.000796319	0.253165	0.35461	0.000347479	0.000486718	0.253165	0.35461	0.000319465	0.00050709	0.253165	0.35461	0.000351883	0.000536926		0.0126483		0.00502667	0.00336392	0.343835	0.767998		0.0047222	0.00392457	0.222716	0.736668		0.00481106	0.00433272	0.313211	0.751783
		1	北湖	2下湄桥街道社区卫生服务中心	15873501108	8.16	4	5	1	0	0	1	1	0.00448522	0.00340375	1.25	0.612745	0.000650001	0.000296518	0.122549	0.25	0.000168204	0.000343136	0	0	0	0	0.122549	0.25	0.000170335	0.000378533		0.00448522		0.00520001	0.00201835	0.349035	0.770016		0.00474156	0.0136799	0.227458	0.750348		0.00500498	0.00672783	0.318216	0.758511
		1	北湖	3人民路街道社区卫生服务中心	13875589704	5.5	4.488	7	1	2	1	2	3	0.00503242	0.00229419	1.55971	1.27273	0.000811053	0.000615894	0.181818	0.222816	0.000249553	0.000305825	0.363636	0.445633	0.000458868	0.000637252	0.545455	0.668449	0.000758147	0.00101212		0.00503242		0.00529907	0.00792247	0.354334	0.777938		0.00476761	0.0014577	0.232225	0.751805		0.00516892	0.00713486	0.323385	0.765646
		2	苏仙	1南塔街道社区卫生服务中心	0735-215466	4.7	4.4	9	0	3	0	0	0	0.00493374	0.00196049	2.04545	1.91489	0.00106364	0.000926649	0	0	0	0	0.638298	0.681818	0.00080546	0.000974996	0	0	0	0		0.00493374		0.00532236	0.00953109	0.359656	0.787469		0.00479954	0.000965332	0.237025	0.752771		0.00519998	0.00370031	0.328585	0.769346
		2	苏仙	2苏仙岭街道社区卫生服务中心	0735-7558120	8	5.9	8	2	3	0	2	2	0.0066157	0.00333701	1.35593	1	0.000705086	0.000483917	0.25	0.338983	0.000343136	0.000465269	0.375	0.508475	0.000473207	0.000727115	0.25	0.338983	0.000347484	0.000513265		0.0066157		0.00539025	0.00183894	0.365046	0.789308		0.00482058	0.00336392	0.241845	0.756135		0.00523168	0.00183894	0.333816	0.771185
		2	苏仙	3岭街道白鹿洞社区卫生服务中心	13762592986	6	4.7	11	4	7	1	2	3	0.00527013	0.00250276	2.34043	1.83333	0.00121702	0.000887181	0.666667	0.851064	0.000915029	0.00116812	1.16667	1.48936	0.0014722	0.00212978	0.5	0.638298	0.000694968	0.000966468		0.00527013		0.00539623	0.00237717	0.370443	0.791686		0.00486109	0.00381244	0.246706	0.759947		0.00529627	0.000908257	0.339113	0.772093
	湘西自治区	1	吉首市	1峒河街道社区卫生服务中心	0743-2815303	64.24	6.4	30	1	9	0	7	7	0.00717635	0.0267962	4.6875	0.466999	0.0024375	0.000225989	0.0155666	0.15625	2.13659e-05	0.00021446	0.1401	1.40625	0.00017679	0.00201093	0.108966	1.09375	0.000151456	0.00165608		0.00717635		0.00543618	0.000965332	0.375879	0.792651		0.00486371	0.0114311	0.25157	0.771378		0.00530482	0.00695209	0.344418	0.779045
		1	吉首市	2镇溪街道社区卫生服务中心	0743-8235517	23.73	13.72	21	4	3	1	7	8	0.0153843	0.00989841	1.53061	0.884956	0.000795919	0.000428245	0.168563	0.291545	0.00023136	0.000400158	0.126422	0.218659	0.000159531	0.000312681	0.337126	0.58309	0.000468584	0.000882876		0.0153843		0.00544763	0.00235474	0.381326	0.795006		0.00503894	0.00459735	0.256609	0.775976		0.0053962	0.00237717	0.349814	0.781422
		1	吉首市	3乾州街道社区卫生服务中心	8531120	63.5	5.435	17	2	4	0	3	3	0.00609429	0.0264875	3.12787	0.267717	0.0016265	0.000129553	0.0314961	0.367985	4.32297e-05	0.000505076	0.0629921	0.735971	7.94889e-05	0.00105243	0.0472441	0.551978	6.56663e-05	0.000835768		0.00609429		0.00545162	0.00695209	0.386778	0.801958		0.00513958	0.00315513	0.261749	0.779131		0.0054022	0.0151376	0.355216	0.79656
		2	龙山县	1华塘社区卫生服务中心	6290136	18.28	1.7	19	0	3	0	5	5	0.00190622	0.00762507	11.1765	1.03939	0.00581177	0.000502977	0	0	0	0	0.164114	1.76471	0.000207093	0.00252352	0.273523	2.94118	0.00038018	0.00445333		0.00190622		0.00546667	0.00437309	0.392245	0.806331		0.00516491	0.000897044	0.266914	0.780028		0.00546762	0.00381244	0.360684	0.800373
		2	龙山县	2民安社区卫生服务中心	0743-6223593	15.3	8.3	30	2	7	0	9	9	0.00930683	0.00638203	3.61446	1.96078	0.00187952	0.000948857	0.130719	0.240964	0.000179417	0.000330733	0.457516	0.843373	0.000577334	0.00120602	0.588235	1.08434	0.00081761	0.00164183		0.00930683		0.00546964	0.0151376	0.397714	0.821468		0.00516491	0.00448522	0.272079	0.784513		0.00568586	0.00253807	0.366369	0.802911
		2	龙山县	3新城社区卫生服务中心	13974324278	29.6	1.3707	11	0	4	0	3	3	0.00153697	0.0123469	8.0251	0.371622	0.00417306	0.000179834	0	0	0	0	0.135135	2.91822	0.000170525	0.00417303	0.101351	2.18866	0.000140872	0.00331393		0.00153697		0.00547369	0.00106524	0.403188	0.822534		0.00543675	0.00213048	0.277515	0.786643		0.00572755	0.00363942	0.372097	0.80655
广西	桂林	1	象山	1桂林市人民医院象山社区卫生服务中心.	3816171	2.37	4.4559	36	18	20	4	26	30	0.00499642	0.000988589	8.07918	15.1899	0.00420118	0.00735064	7.59494	4.03959	0.0104244	0.00554451	8.43882	4.48843	0.0106488	0.00641843	12.6582	6.73265	0.0175941	0.0101941		0.00499642		0.00551112	0.00655963	0.408699	0.829093		0.00565611	0.00327657	0.283171	0.78992		0.00578807	0.00470948	0.377885	0.81126
		1	象山	2平山社区卫生服务中心	0773-2166123	12.4	10.04	39	9	13	0	21	21	0.0112579	0.00517237	3.88446	3.14516	0.00201992	0.001522	0.725806	0.896414	0.000996201	0.00123037	1.04839	1.29482	0.00132295	0.00185159	1.69355	2.09163	0.00235392	0.00316701		0.0112579		0.00560001	0.0014577	0.414299	0.830551		0.00590275	0.00392457	0.289074	0.793845		0.00580935	0.00358818	0.383694	0.814848
		1	象山	3南门街道办事处翠竹社区卫生服中心	0773-3819703	1.367	1.7	10	2	5	0	3	3	0.00190622	0.000570212	5.88235	7.31529	0.00305883	0.00353999	1.46306	1.17647	0.00200811	0.00161476	3.65764	2.94118	0.00461553	0.00420586	2.19459	1.76471	0.00305034	0.002672		0.00190622		0.00572001	0.00560653	0.420019	0.836158		0.00604512	0.0026825	0.295119	0.796527		0.00587246	0.00327657	0.389567	0.818124
		2	叠彩	1叠彩街道办事处社区卫生服务中心	0773-2627069	4.5	8.84	58	19	27	3	32	35	0.00991234	0.00187707	6.56109	12.8889	0.00341177	0.00623715	4.22222	2.14932	0.00579518	0.00295004	6	3.0543	0.00757132	0.00436763	7.77778	3.95928	0.0108106	0.00599487		0.00991234		0.00580494	0.00954231	0.425824	0.8457		0.00614205	0.00414883	0.301261	0.800676		0.00595831	0.00242202	0.395525	0.820546
		2	叠彩	2北门街道办事处北门社区卫生服务中心	0773-2172165	5	6.2	39	10	18	3	21	24	0.00695209	0.00208563	6.29032	7.8	0.00327097	0.00377455	2	1.6129	0.00274509	0.00221378	3.6	2.90323	0.00454279	0.00415159	4.8	3.87097	0.00667169	0.00586116		0.00695209		0.00581177	0.00190622	0.431636	0.847606		0.00618429	0.00337132	0.307446	0.804047		0.00604997	0.00291539	0.401575	0.823462
		2	叠彩	3节海社区卫生服务中心	0773-2600031	2.7	1.8	18	4	10	0	9	9	0.00201835	0.00112624	10	6.66667	0.00520001	0.00322611	1.48148	2.22222	0.0020334	0.0030501	3.7037	5.55556	0.00467365	0.00794441	3.33333	5	0.00463312	0.00757066		0.00201835		0.00600001	0.0014577	0.437636	0.849064		0.00618766	0.00486702	0.313633	0.808914		0.00617497	0.00493374	0.40775	0.828395
		3	七星	1东江社区卫生服务中心	0773-213469	26.3	10.1945	59	24	24	1	20	21	0.0114311	0.0109704	5.78743	2.24335	0.00300947	0.00108559	0.912548	2.35421	0.00125251	0.00323126	0.912548	2.35421	0.00115153	0.00336651	0.798479	2.05993	0.00110984	0.00311901		0.0114311		0.00602106	0.00213048	0.443657	0.851194		0.00620001	0.0134511	0.319833	0.822365		0.00627802	0.00459735	0.414028	0.832993
		3	七星	2宸东社区卫生服务站	0773-5805381	0.6	0.8609	9	2	4	3	0	3	0.000965332	0.000250276	10.4542	15	0.00543618	0.00725875	3.33333	2.32315	0.00457514	0.00318862	6.66667	4.6463	0.00841258	0.00664418	5	3.48473	0.00694968	0.00527634		0.000965332		0.00606667	0.00470948	0.449724	0.855904		0.00638911	0.00253807	0.326222	0.824903		0.00641843	0.00499642	0.420447	0.837989
		3	七星	3七星社区卫生服务站	5813609	12	3.8112	58	13	19	2	11	13	0.00427352	0.00500552	15.2183	4.83333	0.00791353	0.00233893	1.08333	3.411	0.00148692	0.00468174	1.58333	4.98531	0.00199799	0.00712896	1.08333	3.411	0.00150576	0.0051647		0.00427352		0.00624001	0.00140163	0.455964	0.857305		0.00655062	0.00459735	0.332773	0.829501		0.00657797	0.00560653	0.427025	0.843596
	南宁	1	西乡塘	1衡阳南铁社区卫生服务中心	07712731907	5	4	28	10	12	2	13	15	0.00448522	0.00208563	7	5.6	0.00364	0.00270993	2	2.5	0.00274509	0.00343136	2.4	3	0.00302853	0.00428998	3	3.75	0.00416981	0.005678		0.00448522		0.00624001	0.00224261	0.462204	0.859548		0.00688655	0.00336392	0.33966	0.832865		0.00664418	0.000965332	0.433669	0.844561
		1	西乡塘	2北湖南棉社区卫生服务中心	0771-6703117	3.4825	3.1295	58	21	25	7	24	31	0.00350912	0.00145264	18.5333	16.6547	0.00963733	0.00805949	6.03015	6.71034	0.00827664	0.00921023	7.17875	7.9885	0.00905877	0.0114235	8.90165	9.90574	0.0123727	0.0149986		0.00350912		0.00630184	0.00888242	0.468505	0.86843		0.007047	0.00427352	0.346707	0.837138		0.0067031	0.00358818	0.440372	0.848149
		2	兴宁	1长钢社区卫生服务中心	13152668710	0.22	3.3	17	14	12	2	10	12	0.00370031	9.17678e-05	5.15152	77.2727	0.00267879	0.0373936	63.6364	4.24242	0.0873437	0.00582291	54.5455	3.63636	0.0688302	0.00519998	54.5455	3.63636	0.0758147	0.00550594		0.00370031		0.00650001	0.00358818	0.475005	0.872019		0.00717473	0.00064576	0.353881	0.837784		0.00686397	0.00140163	0.447236	0.849551
		2	兴宁	2朝阳社区卫生服务中心	0771-5667306	2.14	0.69	13	7	6	1	8	9	0.000773701	0.00089265	18.8406	6.07477	0.00979711	0.00293968	3.27103	10.1449	0.00448963	0.0139244	2.80374	8.69565	0.003538	0.0124347	4.20561	13.0435	0.00584553	0.0197496		0.000773701		0.00659421	0.00433272	0.4816	0.876351		0.0075584	0.00183894	0.36144	0.839623		0.00700405	0.0027472	0.45424	0.852298
		2	兴宁	3望州南社区卫生服务中心	15878761676	1.7	1.9002	10	2	3	1	1	2	0.0021307	0.000709115	5.2626	5.88235	0.00273656	0.00284657	1.17647	1.05252	0.00161476	0.00144463	1.76471	1.57878	0.00222686	0.00225765	1.17647	1.05252	0.00163522	0.00159366		0.0021307		0.00670289	0.00121785	0.488303	0.877569		0.00779609	0.00237717	0.369236	0.842		0.00712896	0.00427352	0.461369	0.856572
		3	江南	1淡村路西社区卫生服务中心	4989962	1.3	1.148	24	1	8	0	7	7	0.00128726	0.000542264	20.9059	18.4615	0.0108711	0.00893385	0.769231	0.87108	0.0010558	0.0011956	6.15385	6.96864	0.00776546	0.00996511	5.38462	6.09756	0.00748427	0.00923252		0.00128726		0.00693334	0.00336392	0.495236	0.880933		0.00807388	0.00487768	0.37731	0.846878		0.00713427	0.00337132	0.468503	0.859943
		3	江南	2沙井卫生院	13877164784	61	2.354	52	15	17	0	11	11	0.00263955	0.0254447	22.0901	0.852459	0.0114868	0.000412519	0.245902	6.37213	0.000337511	0.00874603	0.278689	7.22175	0.000351673	0.0103271	0.180328	4.6729	0.000250644	0.00707539		0.00263955		0.00722348	0.00064576	0.502459	0.881579		0.00834564	0.00499642	0.385655	0.851874		0.00714997	0.00336392	0.475653	0.863307
		3	江南	3亭子社区卫生服务中心	18776743763	8	6.363	49	12	23	0	17	17	0.00713486	0.00333701	7.70077	6.125	0.00400441	0.00296399	1.5	1.8859	0.00205882	0.00258848	2.875	3.61465	0.00362792	0.00516892	2.125	2.6717	0.00295361	0.0040453		0.00713486		0.00736976	0.00363942	0.509829	0.885218		0.00834575	0.00888242	0.394001	0.860757		0.00740232	0.00953109	0.483055	0.872838
	来宾	1	兴宾	华侨社区卫生服务中心	6016688	28	3.2	75	3	15	2	6	8	0.00358818	0.0116795	23.4375	2.67857	0.0121875	0.00129621	0.107143	0.9375	0.000147058	0.00128676	0.535714	4.6875	0.000676011	0.0067031	0.285714	2.5	0.000397125	0.00378533		0.00358818		0.00741001	0.00448522	0.517239	0.889703		0.00837553	0.00414883	0.402377	0.864905		0.00752628	0.00106524	0.490582	0.873903
贵州	贵阳	1	南明	1龙洞街道办事处社区卫生服务中心	5402630	17.5	1.8	37	13	14	2	8	10	0.00201835	0.00729971	20.5556	2.11429	0.0106889	0.00102314	0.742857	7.22222	0.0010196	0.00991281	0.8	7.77778	0.00100951	0.0111222	0.571429	5.55556	0.000794249	0.00841185		0.00201835		0.00742858	0.0027472	0.524668	0.892451		0.00855472	0.00433272	0.410931	0.869238		0.00756166	0.00954231	0.498143	0.883445
		1	南明	2新华办事处社区卫生服务中心	0851-5817200	3.2	2.3	15	0	5	0	2	2	0.002579	0.0013348	6.52174	4.6875	0.00339131	0.00226836	0	0	0	0	1.5625	2.17391	0.0019717	0.00310868	0.625	0.869565	0.00086871	0.00131664		0.002579		0.00750161	0.00979364	0.532169	0.902244		0.0087647	0.00370031	0.419696	0.872938		0.00786497	0.00448522	0.506008	0.887931
		1	南明	3遵义路街道办事处社区卫生服务中心	0851-8181797	1.83	1.64	17	6	6		6	6	0.00183894	0.000763341	10.3659	9.28962	0.00539025	0.0044954	3.27869	3.65854	0.00450014	0.0050215	3.27869	3.65854	0.00413733	0.00523168	3.27869	3.65854	0.00455717	0.00553951		0.00183894		0.00791353	0.00427352	0.540083	0.906518		0.00878035	0.00448522	0.428476	0.877424		0.00794441	0.00201835	0.513953	0.889949
		2	白云	1艳山红街道办事处社区卫生服务中心	4611088	5.2	3.3	20	6	6	2	3	5	0.00370031	0.00216906	6.06061	3.84615	0.00315152	0.00186122	1.15385	1.81818	0.0015837	0.00249553	1.15385	1.81818	0.00145602	0.00259999	0.961538	1.51515	0.00133648	0.00229414		0.00370031		0.00818519	0.00484404	0.548268	0.911362		0.00914143	0.00126707	0.437618	0.878691		0.0081033	0.00336392	0.522056	0.893313
		2	白云	2天山洞街道办事处社区卫生服务中心	4604161	2.95	4.2987	19	1	10	3	5	8	0.00482015	0.00123052	4.41994	6.44068	0.00229837	0.00311675	0.338983	0.232628	0.000465269	0.000319293	3.38983	2.32628	0.00427758	0.00332657	2.71186	1.86103	0.00376932	0.00281784		0.00482015		0.00823334	0.00134557	0.556501	0.912707		0.0092869	0.00124723	0.446905	0.879938		0.00817139	0.00392457	0.530227	0.897238
		2	白云	3龚家寨街道办事处社区卫生服务中心	0851-4898161	4	4.7	16	3	5	1	7	8	0.00527013	0.00166851	3.40426	4	0.00177021	0.00193567	0.75	0.638298	0.00102941	0.000876092	1.25	1.06383	0.00157736	0.00152127	2	1.70213	0.00277987	0.00257725		0.00527013		0.00832001	0.00672783	0.564821	0.919435		0.00929684	0.00224261	0.456201	0.882181		0.00834163	0.00134557	0.538569	0.898583
		3	小河	1黄河社区卫生服务中心	13809433898	3.5	1.9	22	5	3	0	2	2	0.00213048	0.00145994	11.5789	6.28571	0.00602106	0.00304176	1.42857	2.63158	0.00196078	0.00361196	0.857143	1.57895	0.00108162	0.00225788	0.571429	1.05263	0.000794249	0.00159382		0.00213048		0.00832001	0.00392457	0.573141	0.92336		0.00967047	0.00527013	0.465872	0.887451		0.00861442	0.000930683	0.547183	0.899514
		3	小河	2黄河街道办事处社区卫生服务中心	8314260	1	2.0147	44	13	18	3	11	14	0.00225909	0.000417126	21.8395	44	0.0113565	0.0212923	13	6.45257	0.0178431	0.00885644	18	8.93433	0.022714	0.012776	14	6.94893	0.0194591	0.0105216		0.00225909		0.00842594	0.00242202	0.581567	0.925782		0.00971076	0.00954231	0.475583	0.896993		0.00920655	0.00888242	0.55639	0.908396
		3	小河	3长江街道办事处社区卫生服务中心	3401867	1	2.5	61	24	24	3	11	14	0.00280326	0.000417126	24.4	61	0.012688	0.0295189	24	9.6	0.032941	0.0131764	24	9.6	0.0302853	0.0137279	14	5.6	0.0194591	0.00847914		0.00280326		0.00864765	0.00337132	0.590215	0.929153		0.010029	0.00115494	0.485612	0.898148		0.00971491	0.00792247	0.566105	0.916319
	六盘水	1	六枝特区	第一社区卫生服务中心	0858-5368485	5	6.656	15	0	6	0	9	9	0.00746341	0.00208563	2.25361	3	0.00117188	0.00145175	0	0	0	0	1.2	0.901442	0.00151426	0.00128906	1.8	1.35216	0.00250189	0.00204735		0.00746341		0.00895318	0.00814067	0.599168	0.937294		0.0100429	0.00484404	0.495655	0.902992		0.0097184	0.00115494	0.575823	0.917474
		2	钟山	1黄土坡街道第一社区卫生服务中心	0858-8233950	8.28	10	14	0	21	1	2	3	0.0112131	0.00345381	1.4	1.69082	0.000728001	0.000818217	0	0	0	0	2.53623	2.1	0.00320044	0.00300299	0.362319	0.3	0.0005036	0.00045424		0.0112131		0.00938538	0.00459735	0.608554	0.941891		0.0101712	0.00979364	0.505826	0.912786		0.00993224	0.00064576	0.585756	0.918119
		2	钟山	2荷城街道办事处社区卫生服务中心	0858-8964868	30	11	53	7	14	1	11	12	0.0123344	0.0125138	4.81818	1.76667	0.00250546	0.00085492	0.233333	0.636364	0.00032026	0.000873437	0.466667	1.27273	0.00058888	0.00181999	0.4	1.09091	0.000555975	0.00165178		0.0123344		0.00962964	0.000908257	0.618183	0.942799		0.0103298	0.00224261	0.516156	0.915028		0.00996511	0.00128726	0.595721	0.919407
	毕节	1	毕节市	1市西办事处社区卫生服务中心	0857-8294177	5	1.0861	14	9	9	3	6	9	0.00121785	0.00208563	12.8902	2.8	0.00670289	0.00135497	1.8	8.28653	0.00247058	0.0113736	1.8	8.28653	0.0022714	0.0118497	1.8	8.28653	0.00250189	0.0125469		0.00121785		0.00963733	0.00350912	0.62782	0.946309		0.0103298	0.00134557	0.526485	0.916374		0.0101364	0.0102823	0.605857	0.929689
		1	毕节市	2市东办事处社区卫生服务中心	0857-8292030	10	2.5157	15	3	2	0	2	2	0.00282087	0.00417126	5.96256	1.5	0.00310053	0.000725875	0.3	1.19251	0.000411763	0.00163677	0.2	0.795007	0.000252377	0.00113686	0.2	0.795007	0.000277987	0.00120375		0.00282087		0.00979711	0.000773701	0.637618	0.947082		0.0111805	0.00953109	0.537666	0.925905		0.0101509	0.00979364	0.616008	0.939482
		1	毕节市	3毕节市社区卫生服务中心	0857-8243855	3	1.2	11	0	1	0	0	0	0.00134557	0.00125138	9.16667	3.66667	0.00476667	0.00177436	0	0	0	0	0.333333	0.833333	0.000420629	0.00119166	0	0	0	0		0.00134557		0.00989269	0.00459735	0.64751	0.95168		0.0116962	0.00792247	0.549362	0.933827		0.0103271	0.00263955	0.626335	0.942122
		2	金沙县	1光明社区卫生服务中心	0857-7211072	1.5	0.5702	39	7	6	0	6	6	0.000639368	0.000625689	68.3971	26	0.0355665	0.0125818	4.66667	12.2764	0.0064052	0.0168499	4	10.5226	0.00504755	0.0150473	4	10.5226	0.00555975	0.0159326		0.000639368		0.0104	0.00392457	0.65791	0.955604		0.0120939	0.00363942	0.561456	0.937467		0.0110303	0.00814067	0.637365	0.950263
		2	金沙县	2长安社区卫生服务中心	0857-7252165	2	0.81	15	0	3	0	0	0	0.000908257	0.000834253	18.5185	7.5	0.00962964	0.00362938	0	0	0	0	1.5	3.7037	0.00189283	0.00529627	0	0	0	0		0.000908257		0.0106889	0.00201835	0.668599	0.957623		0.0122364	0.00814067	0.573692	0.945607		0.0111222	0.00201835	0.648487	0.952281
		2	金沙县	3城关镇紫金社区卫生服务中心	15934730557	3	3	7	1	1	0	1	1	0.00336392	0.00125138	2.33333	2.33333	0.00121333	0.00112914	0.333333	0.333333	0.000457514	0.000457514	0.333333	0.333333	0.000420629	0.000476665	0.333333	0.333333	0.000463312	0.000504711		0.00336392		0.0108711	0.00128726	0.67947	0.95891		0.0123958	0.00336392	0.586088	0.948971		0.0112357	0.00156983	0.659723	0.953851
		3	赫章县	1麻姑矿区社区卫生服务中心	15085305984	6	0.83	19	0	5	0	2	2	0.000930683	0.00250276	22.8916	3.16667	0.0119036	0.0015324	0	0	0	0	0.833333	6.0241	0.00105157	0.00861442	0.333333	2.40964	0.000463312	0.00364851		0.000930683		0.0111068	0.00115494	0.690577	0.960065		0.0127522	0.00217993	0.59884	0.951151		0.0112546	0.00484404	0.670978	0.958695
		3	赫章县	2城关后河社区卫生服务中心	0857-3222935	71.63	5.8	11	2	6	0	3	3	0.00650357	0.0298788	1.89655	0.153567	0.000986208	7.43136e-05	0.0279213	0.344828	3.83231e-05	0.000473291	0.0837638	1.03448	0.0001057	0.0014793	0.0418819	0.517241	5.82132e-05	0.000783172		0.00650357		0.0113565	0.00225909	0.701934	0.962324		0.0127893	0.00470948	0.61163	0.955861		0.0114235	0.00350912	0.682401	0.962204
		3	赫章县	3城关镇龙泉社区小河东四路卫生服务站	0857-3225289	1.5	0.5	3	0	1	0	0	0	0.000560653	0.000625689	6	2	0.00312	0.000967834	0	0	0	0	0.666667	2	0.000841258	0.00285999	0	0	0	0		0.000560653		0.0114868	0.00263955	0.713421	0.964963		0.0131646	0.00263955	0.624794	0.9585		0.0118497	0.00121785	0.694251	0.963422
宁夏	银川	1	兴庆	1燕鸽湖社区卫生服务中心	6934552	2	4	57	17	22	4	22	26	0.00448522	0.000834253	14.25	28.5	0.00741001	0.0137916	8.5	4.25	0.0116666	0.00583331	11	5.5	0.0138808	0.00786497	13	6.5	0.0180692	0.00984186		0.00448522		0.0118182	0.00246687	0.725239	0.96743		0.0133308	0.00225909	0.638125	0.960759		0.0122571	0.000784914	0.706508	0.964207
		1	兴庆	2玉皇阁北街社区卫生服务中心	0951-6736887	10	30	124	48	64			0	0.0336392	0.00417126	4.13333	12.4	0.00214934	0.00600057	4.8	1.6	0.00658821	0.00219607	6.4	2.13333	0.00807607	0.00305065	0	0	0	0		0.0336392		0.0118857	0.000784914	0.737124	0.968215		0.0133905	0.00242202	0.651516	0.963181		0.0123499	0.00246687	0.718858	0.966674
		1	兴庆	3胜利南街天竺社区卫生服务中心	13195086360	3.75	2	7	3	2	3	3	6	0.00224261	0.00156422	3.5	1.86667	0.00182	0.000903311	0.8	1.5	0.00109803	0.00205882	0.533333	1	0.000673006	0.00142999	1.6	3	0.0022239	0.0045424		0.00224261		0.0119036	0.000930683	0.749028	0.969146		0.0138633	0.00350912	0.665379	0.966691		0.0124347	0.000773701	0.731293	0.967447
		2	金凤	3民生花园社区卫生服务中心	5077505	0.6	1.26	7	1	2	1	2	3	0.00141284	0.000250276	5.55556	11.6667	0.00288889	0.0056457	1.66667	0.793651	0.00228757	0.00108932	3.33333	1.5873	0.00420629	0.00226983	5	2.38095	0.00694968	0.00360508		0.00141284		0.0121875	0.00358818	0.761216	0.972734		0.0141504	0.00818553	0.679529	0.974876		0.012776	0.00225909	0.744069	0.969706
		3	西夏	1朔方路社区卫生服务中心	3851758	30	5.6029	38	6	18	6	6	12	0.00628256	0.0125138	6.7822	1.26667	0.00352675	0.000612961	0.2	1.07087	0.000274509	0.00146982	0.6	3.21262	0.000757132	0.00459403	0.4	2.14175	0.000555975	0.00324289		0.00628256		0.0124248	0.00126707	0.77364	0.974001		0.0144617	0.00672783	0.693991	0.981604		0.01324	0.00217993	0.757309	0.971886
		3	西夏	2怀远路社区卫生服务中心	2966248	8	2.3923	15	7	4	3	4	7	0.0026825	0.00333701	6.27012	1.875	0.00326046	0.000907344	0.875	2.92605	0.00120098	0.00401614	0.5	1.67203	0.000630943	0.00239099	0.875	2.92605	0.00121619	0.00443043		0.0026825		0.0124658	0.00818553	0.786106	0.982187		0.0147569	0.000156983	0.708748	0.981761		0.0137279	0.00280326	0.771037	0.97469
		3	西夏	3怡安社区卫生服务中心	2012179	6	2.1	14	3	6	2	4	6	0.00235474	0.00250276	6.66667	2.33333	0.00346667	0.00112914	0.5	1.42857	0.000686272	0.00196078	1	2.85714	0.00126189	0.0040857	1	2.85714	0.00138994	0.00432609		0.00235474		0.0125714	0.00217993	0.798678	0.984367		0.0147569	0.00156983	0.723505	0.983331		0.0139203	0.00126707	0.784957	0.975957
	中卫	1	市沙坡头区	市沙坡头区滨河社区卫生服务中心	0955-7022610	25	13.5	142	14	51	7	32	39	0.0151376	0.0104282	10.5185	5.68	0.00546964	0.00274865	0.56	1.03704	0.000768624	0.00142338	2.04	3.77778	0.00257425	0.0054022	1.56	2.88889	0.0021683	0.00437416		0.0151376		0.012688	0.00280326	0.811366	0.98717		0.0149209	0.00201835	0.738426	0.985349		0.0142999	0.00224261	0.799257	0.978199
	固原	1	原州	1宋家巷社区卫生服务中心	0954-2068487	10	5.05	25	3	10	2	9	11	0.00566259	0.00417126	4.9505	2.5	0.00257426	0.00120979	0.3	0.594059	0.000411763	0.000815372	1	1.9802	0.00126189	0.00283167	1.1	2.17822	0.00152893	0.00329811		0.00566259		0.0148572	0.000156983	0.826223	0.987327		0.0171197	0.00121785	0.755545	0.986567		0.0150473	0.000639368	0.814304	0.978839
		1	原州	2和平路城市社区卫生服务中心	0954-3969628	12	2.6	25	1	11	5	6	11	0.00291539	0.00500552	9.61538	2.08333	0.00500001	0.00100816	0.0833333	0.384615	0.000114379	0.000527901	0.916667	4.23077	0.00115673	0.00604997	0.916667	4.23077	0.00127411	0.00640595		0.00291539		0.0150222	0.00100917	0.841245	0.988336		0.0198333	0.00280326	0.775379	0.98937		0.0162588	0.00818553	0.830563	0.987024
北京	朝阳		朝阳	1亚运村社区卫生服务中心	64916748	5.13	7.3	175	50	83	23	38	61	0.00818553	0.00213986	23.9726	34.1131	0.0124658	0.0165079	9.74659	6.84932	0.0133776	0.00940098	16.1793	11.3699	0.0204165	0.0162588	11.8908	8.35616	0.0165275	0.0126523		0.00818553		0.0156	0.00224261	0.856845	0.990579		0.0206596	0.000560653	0.796038	0.989931		0.0192843	0.00124723	0.849847	0.988271
			朝阳	2三里屯社区卫生服务中心	64155582	9.27	7.9215	96	32	51	2	16	18	0.00888242	0.00386676	12.1189	10.356	0.00630184	0.00501144	3.452	4.03964	0.00473801	0.00554458	5.50162	6.43817	0.00694242	0.00920655	1.94175	2.2723	0.00269891	0.00344056		0.00888242		0.0163429	0.00156983	0.873188	0.992148		0.0209591	0.000773701	0.816997	0.990704		0.0200199	0.000560653	0.869867	0.988832
			朝阳	3八里庄社区卫生服务中心	65066338	4.4	8.51	95	40	45	12	25	37	0.00954231	0.00183536	11.1633	21.5909	0.00580494	0.0104482	9.09091	4.70035	0.0124777	0.00645144	10.2273	5.2879	0.0129057	0.00756166	8.40909	4.34783	0.0116881	0.00658318		0.00954231		0.02057	0.00124723	0.893758	0.993396		0.0253626	0.000639368	0.84236	0.991344		0.0204285	0.000156983	0.890296	0.988989
	顺义		顺义	城区社区卫生服务中心	69448469	11.12	24	98	36	59	1	52	53	0.0269113	0.00463844	4.08333	8.81295	0.00212334	0.00426473	3.23741	1.5	0.00444349	0.00205882	5.30576	2.45833	0.00669526	0.0035154	4.76619	2.20833	0.0066247	0.00334371		0.0269113		0.0208	0.000560653	0.914558	0.993956		0.0333173	0.00396325	0.875677	0.995307		0.0230612	0.00396325	0.913357	0.992952
	石景山		石景山	1金顶街社区卫生服务中心	88293218	17.9	10	49	20	22	5	20	25	0.0112131	0.00746656	4.9	2.73743	0.002548	0.00132469	1.11732	2	0.00153357	0.00274509	1.22905	2.2	0.00155092	0.00314599	1.39665	2.5	0.00194125	0.00378533		0.0112131		0.0239808	0.00396325	0.938539	0.99792		0.0361544	0.00224261	0.911832	0.99755		0.0238332	0.00100917	0.93719	0.993962
			石景山	2八宝山社区卫生服务中心	88682861	5.3	9.1699	69	14	65	18	17	35	0.0102823	0.00221077	7.52462	13.0189	0.00391281	0.00630005	2.64151	1.52673	0.00362559	0.00209551	12.2642	7.08841	0.015476	0.0101364	6.60377	3.81684	0.00917883	0.00577919		0.0102823		0.0258948	0.0014411	0.964433	0.999361		0.0367282	0.00100917	0.94856	0.998559		0.0272048	0.00459735	0.964395	0.998559
			石景山	3五里坨街道社区卫生服务中心	51510589	13	3	40	18	15	4	16	20	0.00336392	0.00542264	13.3333	3.07692	0.00693334	0.00148897	1.38462	6	0.00190044	0.00823526	1.15385	5	0.00145602	0.00714997	1.53846	6.66667	0.00213836	0.0100942		0.00336392		0.0355665	0.000639368	1	1		0.0514401	0.0014411	1	1		0.0356052	0.0014411	1	1
						2397.36	891.818	6573	1773	2582	422	1889	2311	1	1	1923.07	2066.47	1	1	728.574	484.036	1	0.665756	792.464	699.304	1	1	719.457	660.444	1	1		1		1	1				1	1				1	1
																																													人均资源	本科以上学历	执业医师	中级以上
					服务面积百分比			服务面积百分比	地均拥有卫生资源百分比	x	y		服务面积百分比	地均拥有本科以上资源百分比	x	y		服务面积百分比	地均拥有执业医师百分比	x	y		服务面积百分比	地均拥有中级以上医师百分比	x	y																			0.204033	0.171667	0.213817	0.182667
										0	0				0	0				0	0				0	0																			0.295967	0.328333	0.286183	0.317333
					0.00279475			0.0417126	6.29092e-05	0.0417126	6.29092e-05		0.00417126	0	0.00417126	0		8.34253e-05	0	8.34253e-05	0		0.00150165	0	0.00150165	0																			0.591933	0.656667	0.572367	0.634667
					0.00250276			0.0298788	7.43136e-05	0.0715914	0.000137223		0.00150165	0	0.00567292	0		0.00145994	0	0.00154337	0		0.0139529	0	0.0154545	0
					0.00250276			0.0380836	0.000106006	0.109675	0.000243229		0.000375414	0	0.00604833	0		0.00340375	0	0.00494712	0		0.00709115	0	0.0225457	0
					0.00354557			0.0264875	0.000129553	0.136163	0.000372781		0.0166851	0	0.0227334	0		0.0417126	6.30943e-05	0.0466597	6.30943e-05		0.00208563	0	0.0246313	0
					0.00917678			0.0123469	0.000179834	0.148509	0.000552615		0.0079254	0	0.0306588	0		0.0264875	7.94889e-05	0.0731473	0.000142583		0.000834253	0	0.0254656	0
					0.000533922			0.0333701	0.000181469	0.18188	0.000734084		0.00208563	0	0.0327444	0		0.0380836	8.29279e-05	0.111231	0.000225511		0.000417126	0	0.0258827	0
					0.000667402			0.0233591	0.00019011	0.205239	0.000924194		0.0179364	0	0.0506808	0		0.0298788	0.0001057	0.14111	0.000331212		0.00196049	0	0.0278432	0
					0.00417126			0.0142657	0.000212244	0.219504	0.00113644		0.00291988	0	0.0536007	0		0.0177279	0.000118766	0.158838	0.000449977		0.00125138	0	0.0290946	0
					0.000417126			0.0104282	0.000212923	0.229933	0.00134936		0.00697852	0	0.0605793	0		0.0333701	0.000126189	0.192208	0.000576166		0.000834253	0	0.0299288	0
					0.00463511			0.0417126	0.000222602	0.271645	0.00157196		0.000291988	0	0.0608712	0		0.0142657	0.000147589	0.206473	0.000723755		0.000625689	0	0.0305545	0
					0.0233591			0.0267962	0.000225989	0.298441	0.00179795		0.00196049	0	0.0628317	0		0.0104282	0.000151426	0.216901	0.000875181		0.00417126	0	0.0347258	0
					0.00260704			0.0177279	0.000250498	0.316169	0.00204845		0.00762507	0	0.0704568	0		0.0233591	0.000157736	0.240261	0.00103292		0.0298788	5.82132e-05	0.0646045	5.82132e-05
					0.0380836			0.0166851	0.000254056	0.332854	0.00230251		0.0123469	0	0.0828037	0		0.0166851	0.000157736	0.256946	0.00119065		0.0380836	6.08954e-05	0.102688	0.000119109
					0.00173525			0.0139529	0.000274871	0.346807	0.00257738		0.0013348	0	0.0841385	0		0.00989841	0.000159531	0.266844	0.00135018		0.0177279	6.54088e-05	0.120416	0.000184517
					0.0177279			0.00340375	0.000296518	0.350211	0.0028739		0.00208563	0	0.0862242	0		0.0123469	0.000170525	0.279191	0.00152071		0.0264875	6.56663e-05	0.146904	0.000250184
					0.0104282			0.0125138	0.000306481	0.362725	0.00318038		0.00345381	0	0.089678	0		0.0267962	0.00017679	0.305987	0.0016975		0.0417126	8.33962e-05	0.188616	0.00033358
					0.00250276			0.0102196	0.000355531	0.372944	0.00353591		0.00125138	0	0.0909294	0		0.00762507	0.000207093	0.313612	0.00190459		0.0123469	0.000140872	0.200963	0.000474452
					0.000112624			0.00709115	0.000370054	0.380035	0.00390596		0.000834253	0	0.0917636	0		0.00709115	0.000222686	0.320703	0.00212728		0.0233591	0.000148922	0.224322	0.000623373
					0.000250276			0.0079254	0.00038204	0.387961	0.004288		0.00250276	0	0.0942664	0		0.0417126	0.000252377	0.362416	0.00237965		0.0267962	0.000151456	0.251118	0.00077483
					0.000625689			0.0260704	0.000387133	0.414031	0.00467513		0.000625689	0	0.0948921	0		0.00417126	0.000252377	0.366587	0.00263203		0.00340375	0.000170335	0.254522	0.000945165
					0.00333701			0.0179364	0.000393886	0.431968	0.00506902		0.0267962	2.13659e-05	0.121688	2.13659e-05		0.0079254	0.00026566	0.374513	0.00289769		0.0166851	0.000173742	0.271207	0.00111891
					0.00500552			0.0183953	0.000406007	0.450363	0.00547503		0.0298788	3.83231e-05	0.151567	5.9689e-05		0.0125138	0.00029444	0.387026	0.00319213		0.0333701	0.000191116	0.304577	0.00131002
					0.00166851			0.0254447	0.000412519	0.475808	0.00588755		0.0417126	4.11763e-05	0.19328	0.000100865		0.0260704	0.000302853	0.413097	0.00349499		0.0104282	0.00022239	0.315005	0.00153241
					8.34253e-05			0.00989841	0.000428245	0.485706	0.00631579		0.0264875	4.32297e-05	0.219767	0.000144095		0.0102196	0.000309033	0.423316	0.00380402		0.0417126	0.00022239	0.356718	0.0017548
					7.09115e-05			0.0263061	0.000437378	0.512012	0.00675317		0.0380836	4.51e-05	0.257851	0.000189195		0.0065906	0.000319465	0.429907	0.00412348		0.0254447	0.000250644	0.382163	0.00200545
					8.34253e-05			0.00917678	0.000439924	0.521189	0.00719309		0.0125138	4.57514e-05	0.270365	0.000234946		0.0139529	0.000339521	0.44386	0.004463		0.0260704	0.000266868	0.408233	0.00227232
					0.00542264			0.00312845	0.000451656	0.524317	0.00764475		0.0333701	5.14704e-05	0.303735	0.000286417		0.00150165	0.000350524	0.445362	0.00481353		0.00417126	0.000277987	0.412404	0.0025503
					0.00150165			0.013932	0.000478121	0.538249	0.00812287		0.0104282	5.49017e-05	0.314163	0.000341319		0.0254447	0.000351673	0.470806	0.0051652		0.00417126	0.000277987	0.416576	0.00282829
					0.000500552			0.00333701	0.000483917	0.541586	0.00860679		0.0102196	5.60222e-05	0.324382	0.000397341		0.0179364	0.000352154	0.488743	0.00551736		0.0079254	0.000292618	0.424501	0.00312091
					0.00671573			0.00762507	0.000502977	0.549211	0.00910976		0.0142657	8.02657e-05	0.338648	0.000477606		0.0183953	0.000371985	0.507138	0.00588934		0.0183953	0.000315178	0.442896	0.00343609
					0.00166851			0.00417126	0.000532309	0.553383	0.00964207		0.0417126	8.23526e-05	0.380361	0.000559959		0.00417126	0.000378566	0.511309	0.00626791		0.013932	0.000332919	0.456828	0.00376901
					0.000375414			0.00166851	0.000604896	0.555051	0.010247		0.00625689	9.15029e-05	0.386618	0.000651462		0.013932	0.000415591	0.525241	0.0066835		0.00166851	0.000347484	0.458497	0.00411649
					0.0417126			0.0125138	0.000612961	0.567565	0.0108599		0.0177279	9.68854e-05	0.404346	0.000748347		0.00625689	0.000420629	0.531498	0.00710413		0.00333701	0.000347484	0.461834	0.00446397
					0.000625689			0.00229419	0.000615894	0.569859	0.0114758		0.00570629	0.000100332	0.410052	0.000848679		0.00125138	0.000420629	0.53275	0.00752476		0.0065906	0.000351883	0.468424	0.00481586
					0.000650717			0.00150165	0.000672107	0.571361	0.0121479		0.00500552	0.000114379	0.415057	0.000963058		0.00125138	0.000420629	0.534001	0.00794539		0.00488038	0.000356394	0.473305	0.00517225
					0.00145994			0.00208563	0.000677484	0.573446	0.0128254		0.013932	0.000123282	0.428989	0.00108634		0.00125138	0.000420629	0.535252	0.00836601		0.00625689	0.00037065	0.479562	0.0055429
					0.00158508			0.00625689	0.000709745	0.579703	0.0135352		0.0263061	0.000130584	0.455295	0.00121692		0.00229419	0.000458868	0.537546	0.00882488		0.00312845	0.00037065	0.48269	0.00591355
					0.0142657			0.00417126	0.000725875	0.583875	0.014261		0.0116795	0.000147058	0.466975	0.00136398		0.0125138	0.000462692	0.55006	0.00928757		0.0125138	0.00037065	0.495204	0.0062842
					0.00069243			0.0065906	0.000796319	0.590465	0.0150574		0.0183953	0.000155617	0.48537	0.0015196		0.00333701	0.000473207	0.553397	0.00976078		0.00762507	0.00038018	0.502829	0.00666438
					0.00213569			0.00570629	0.000813603	0.596171	0.015871		0.00340375	0.000168204	0.488774	0.0016878		0.00208563	0.000504755	0.555483	0.0102655		0.00762507	0.00038018	0.510454	0.00704456
					0.000850938			0.00345381	0.000818217	0.599625	0.0166892		0.00333701	0.000171568	0.492111	0.00185937		0.0263061	0.00056026	0.581789	0.0108258		0.0263061	0.000396715	0.53676	0.00744127
					0.0010011			0.00762507	0.000820647	0.60725	0.0175098		0.00638203	0.000179417	0.498493	0.00203879		0.00638203	0.000577334	0.588171	0.0114031		0.0102196	0.000397125	0.54698	0.0078384
					0.00400441			0.0111373	0.000833714	0.618388	0.0183435		0.00312845	0.000183006	0.501621	0.00222179		0.0125138	0.00058888	0.600685	0.011992		0.0116795	0.000397125	0.558659	0.00823552
					0.000917678			0.00166851	0.000846855	0.620056	0.0191904		0.0260704	0.000197646	0.527692	0.00241944		0.0111373	0.000614402	0.611822	0.0126064		0.00697852	0.000415402	0.565638	0.00865093
					0.00104282			0.00333701	0.000846855	0.623393	0.0200372		0.0125138	0.000228757	0.540206	0.0026482		0.00166851	0.000630943	0.613491	0.0132374		0.00533922	0.000434355	0.570977	0.00908528
					0.00333701			0.0125138	0.00085492	0.635907	0.0208922		0.00989841	0.00023136	0.550104	0.00287956		0.00166851	0.000630943	0.615159	0.0138683		0.00917678	0.000442253	0.580154	0.00952753
					0.00125138			0.00880136	0.000871509	0.644708	0.0217637		0.00709115	0.000242214	0.557195	0.00312177		0.000834253	0.000630943	0.615993	0.0144992		0.00125138	0.000463312	0.581405	0.00999085
					0.00554778			0.00250276	0.000887181	0.647211	0.0226509		0.0233591	0.000245097	0.580554	0.00336687		0.00333701	0.000630943	0.61933	0.0151302		0.00250276	0.000463312	0.583908	0.0104542
					0.00834253			0.00156422	0.000903311	0.648775	0.0235542		0.00229419	0.000249553	0.582848	0.00361642		0.00488038	0.000647121	0.624211	0.0157773		0.00989841	0.000468584	0.593806	0.0109227
					0.00145994			0.0125138	0.000903311	0.661289	0.0244575		0.0125138	0.000274509	0.595362	0.00389093		0.00312845	0.000673006	0.627339	0.0164503		0.0142657	0.000487697	0.608072	0.0114104
					0.00625689			0.00333701	0.000907344	0.664626	0.0253648		0.0139529	0.000287229	0.609315	0.00417816		0.00156422	0.000673006	0.628903	0.0171233		0.00354557	0.000490566	0.611618	0.011901
					0.0125138			0.00400441	0.000907344	0.66863	0.0262722		0.00762507	0.000300338	0.61694	0.0044785		0.0116795	0.000676011	0.640583	0.0177993		0.00817568	0.000496406	0.619793	0.0123974
					0.0166851			0.00196049	0.000926649	0.670591	0.0271988		0.0125138	0.00032026	0.629454	0.00479876		0.00917678	0.000688302	0.64976	0.0184876		0.00345381	0.0005036	0.623247	0.012901
					0.00125972			0.00638203	0.000948857	0.676973	0.0281477		0.0254447	0.000337511	0.654899	0.00513627		0.00834253	0.000757132	0.658102	0.0192448		0.00834253	0.000555975	0.63159	0.013457
					0.0111373			0.00817568	0.000962896	0.685149	0.0291106		0.00166851	0.000343136	0.656567	0.0054794		0.0125138	0.000757132	0.670616	0.0200019		0.0125138	0.000555975	0.644103	0.014013
					0.00187707			0.000625689	0.000967834	0.685774	0.0300784		0.00333701	0.000343136	0.659904	0.00582254		0.00196049	0.00080546	0.672577	0.0208074		0.0125138	0.000555975	0.656617	0.0145689
					0.00145577			0.00500552	0.00100816	0.69078	0.0310866		0.0065906	0.000347479	0.666495	0.00617002		0.00697852	0.000829692	0.679555	0.021637		0.0179364	0.000614158	0.674554	0.0151831
					0.00179781			0.00729971	0.00102314	0.69808	0.0321097		0.00488038	0.000351934	0.671375	0.00652195		0.00570629	0.000830189	0.685261	0.0224672		0.0111373	0.000624691	0.685691	0.0158078
					0.00112624			0.00488038	0.00103401	0.70296	0.0331437		0.00312845	0.000366012	0.674504	0.00688796		0.00250276	0.000841258	0.687764	0.0233085		0.00260704	0.000667169	0.688298	0.016475
					0.00229419			0.0109704	0.00108559	0.71393	0.0342293		0.00145994	0.000392155	0.675964	0.00728012		0.000625689	0.000841258	0.68839	0.0241498		0.00250276	0.000694968	0.690801	0.0171699
					0.00333701			0.00500552	0.00108881	0.718936	0.0353181		0.00417126	0.000411763	0.680135	0.00769188		0.000625689	0.000841258	0.689015	0.024991		0.00400441	0.000723925	0.694805	0.0178938
					0.00740816			0.00125138	0.00112914	0.720187	0.0364473		0.00417126	0.000411763	0.684306	0.00810365		0.00762507	0.000897403	0.696641	0.0258884		0.00229419	0.000758147	0.697099	0.018652
					0.00333701			0.00250276	0.00112914	0.72269	0.0375764		0.00817568	0.000420166	0.692482	0.00852381		0.00817568	0.000901348	0.704816	0.0267898		0.00221077	0.000786756	0.69931	0.0194387
					0.00618181			0.00354557	0.00113863	0.726236	0.038715		0.00125138	0.000457514	0.693733	0.00898133		0.00400441	0.000920126	0.708821	0.0277099		0.00291988	0.000794249	0.70223	0.020233
					0.00521408			0.00834253	0.0011856	0.734578	0.0399006		0.00125138	0.000457514	0.694985	0.00943884		0.00533922	0.000985849	0.71416	0.0286957		0.00729971	0.000794249	0.70953	0.0210272
					0.0139529			0.00697852	0.00118593	0.741557	0.0410865		0.00123052	0.000465269	0.696215	0.00990411		0.00729971	0.00100951	0.72146	0.0297052		0.00145994	0.000794249	0.71099	0.0218215
					0.0183953			0.000834253	0.00120979	0.742391	0.0422963		0.00917678	0.000499107	0.705392	0.0104032		0.00354557	0.0010392	0.725005	0.0307444		0.00638203	0.00081761	0.717372	0.0226391
					0.00762507			0.00417126	0.00120979	0.746562	0.0435061		0.00533922	0.00053615	0.710731	0.0109394		0.00250276	0.00105157	0.727508	0.031796		0.0013348	0.00086871	0.718707	0.0235078
					0.013932			0.00463511	0.00121937	0.751197	0.0447255		0.00880136	0.000585445	0.719532	0.0115248		0.00145994	0.00108162	0.728968	0.0328776		0.00321187	0.000902556	0.721918	0.0244104
					0.0260704			0.00312845	0.00122592	0.754326	0.0459514		0.00166851	0.000686272	0.721201	0.0122111		0.00145994	0.00108162	0.730428	0.0339592		0.000634032	0.000914432	0.722552	0.0253248
					0.0263061			0.00250276	0.00129044	0.756829	0.0472419		0.00333701	0.000686272	0.724538	0.0128974		0.00333701	0.00110415	0.733765	0.0350634		0.00570629	0.000914432	0.728259	0.0262392
					0.00139696			0.0116795	0.00129621	0.768508	0.0485381		0.000834253	0.000686272	0.725372	0.0135836		0.00238179	0.00110498	0.736147	0.0361684		0.00880136	0.000922233	0.73706	0.0271615
					0.000644043			0.00279475	0.00130008	0.771303	0.0498382		0.00250276	0.000686272	0.727875	0.0142699		0.00880136	0.0011363	0.744948	0.0373047		0.000625689	0.000926624	0.737686	0.0280881
					0.000634032			0.00746656	0.00132469	0.778769	0.0511628		0.0104282	0.000768624	0.738303	0.0150385		0.00321187	0.00114717	0.74816	0.0384518		0.00463511	0.00100067	0.742321	0.0290888
					0.000446325			0.00208563	0.00135497	0.780855	0.0525178		0.00221077	0.000776911	0.740514	0.0158154		0.0109704	0.00115153	0.75913	0.0396034		0.00166851	0.00104245	0.743989	0.0301312
					0.000542264			0.00533922	0.00136102	0.786194	0.0538788		0.00354557	0.000807378	0.744059	0.0166228		0.00500552	0.00115673	0.764136	0.0407601		0.0109704	0.00110984	0.75496	0.0312411
					0.000319519			0.00208563	0.00145175	0.78828	0.0553306		0.00321187	0.000891262	0.747271	0.0175141		0.00312845	0.00117776	0.767264	0.0419379		0.00312845	0.00111195	0.758088	0.032353
					0.00204392			0.00333701	0.00145175	0.791617	0.0567823		0.00250276	0.000915029	0.749774	0.0184291		0.00260704	0.00121141	0.769871	0.0431493		0.00333701	0.00121619	0.761425	0.0335692
					0.00115127			0.00542264	0.00148897	0.797039	0.0582713		0.00250276	0.000915029	0.752277	0.0193441		0.00333701	0.00126189	0.773208	0.0444112		0.00333701	0.00121619	0.764762	0.0347854
					0.000625689			0.00333701	0.00151224	0.800376	0.0597835		0.00834253	0.00096078	0.760619	0.0203049		0.00250276	0.00126189	0.775711	0.0456731		0.00333701	0.00121619	0.768099	0.0360016
					0.00312845			0.00517237	0.001522	0.805549	0.0613055		0.0111373	0.000976716	0.771757	0.0212816		0.00417126	0.00126189	0.779882	0.0469349		0.00500552	0.00127411	0.773105	0.0372757
					0.00312845			0.00250276	0.0015324	0.808052	0.0628379		0.00463511	0.000988152	0.776392	0.0222698		0.00517237	0.00132295	0.785055	0.0482579		0.00618181	0.00131303	0.779287	0.0385887
					0.0125138			0.000500552	0.00161306	0.808552	0.064451		0.00517237	0.000996201	0.781564	0.023266		0.00834253	0.00132498	0.793397	0.0495829		0.00216906	0.00133648	0.781456	0.0399252
					0.00880136			0.00321187	0.00163401	0.811764	0.066085		0.00729971	0.0010196	0.788864	0.0242856		0.00216906	0.00145602	0.795566	0.0510389		0.00333701	0.00138994	0.784793	0.0413151
					0.00709115			0.00542264	0.00174955	0.817187	0.0678345		0.00166851	0.00102941	0.790532	0.025315		0.00542264	0.00145602	0.800989	0.0524949		0.00250276	0.00138994	0.787295	0.0427051
					0.0079254			0.00125138	0.00177436	0.818438	0.0696089		0.000542264	0.0010558	0.791075	0.0263708		0.00250276	0.0014722	0.803492	0.0539671		0.00500552	0.00150576	0.792301	0.0442108
					0.0417126			0.00250276	0.00177436	0.820941	0.0713833		0.00260704	0.00109803	0.793682	0.0274688		0.00250276	0.0014722	0.805994	0.0554393		0.00417126	0.00152893	0.796472	0.0457398
					0.0102196			0.00250276	0.00177436	0.823444	0.0731576		0.00104282	0.00109803	0.794724	0.0285669		0.00250276	0.0014722	0.808497	0.0569115		0.0125138	0.00157526	0.808986	0.047315
					0.00570629			0.00554778	0.00178285	0.828991	0.0749405		0.00156422	0.00109803	0.796289	0.0296649		0.00463511	0.00147629	0.813132	0.0583878		0.000734142	0.00157947	0.80972	0.0488945
					0.00208563			0.00145994	0.00179741	0.830451	0.0767379		0.00250276	0.00114379	0.798791	0.0308087		0.00208563	0.00151426	0.815218	0.0599021		0.00250276	0.00162159	0.812223	0.0505161
					0.0333701			0.00216906	0.00186122	0.83262	0.0785991		0.00500552	0.00114379	0.803797	0.0319525		0.00746656	0.00155092	0.822684	0.061453		0.000709115	0.00163522	0.812932	0.0521513
					0.0179364			0.00671573	0.00186353	0.839336	0.0804626		0.000500552	0.00114379	0.804297	0.0330963		0.00166851	0.00157736	0.824353	0.0630303		0.00500552	0.00173742	0.817938	0.0538887
					0.00333701			0.000417126	0.00193567	0.839753	0.0823983		0.00333701	0.00120098	0.807634	0.0342972		0.00554778	0.00161294	0.829901	0.0646433		0.00333701	0.00173742	0.821275	0.0556262
					0.00291988			0.00166851	0.00193567	0.841422	0.084334		0.00333701	0.00120098	0.810972	0.0354982		0.000650717	0.0016178	0.830551	0.0662611		0.000650717	0.00178197	0.821925	0.0574081
					0.00697852			0.00618181	0.00195918	0.847604	0.0862932		0.00279475	0.00122914	0.813766	0.0367274		0.00221077	0.00166664	0.832762	0.0679277		0.00746656	0.00194125	0.829392	0.0593494
					0.000291988			0.00221077	0.00200871	0.849814	0.0883019		0.0109704	0.00125251	0.824737	0.0379799		0.00279475	0.00169507	0.835557	0.0696228		0.00521408	0.00200151	0.834606	0.0613509
					0.00221077			0.00238179	0.00203398	0.852196	0.0903358		0.00542264	0.00126696	0.830159	0.0392468		0.00500552	0.00178767	0.840562	0.0714105		0.00542264	0.00213836	0.840029	0.0634893
					0.00116795			0.00260704	0.00209052	0.854803	0.0924264		0.00333701	0.00137254	0.833496	0.0406194		0.00291988	0.0018027	0.843482	0.0732132		0.0104282	0.0021683	0.850457	0.0656576
					0.00238179			0.000375414	0.00215074	0.855179	0.0945771		0.00333701	0.00137254	0.836833	0.0419919		0.00542264	0.0018443	0.848905	0.0750575		0.00156422	0.0022239	0.852021	0.0678815
					0.000312845			0.000625689	0.00225828	0.855804	0.0968354		0.000417126	0.00137254	0.83725	0.0433645		0.000834253	0.00189283	0.849739	0.0769503		0.00204392	0.00226928	0.854065	0.0701507
					0.000258618			0.0013348	0.00226836	0.857139	0.0991037		0.00500552	0.00148692	0.842256	0.0448514		0.0013348	0.0019717	0.851074	0.078922		0.00279475	0.00228199	0.85686	0.0724327
					0.000333701			0.00834253	0.0023228	0.865482	0.101427		0.00746656	0.00153357	0.849723	0.0463849		0.00500552	0.00199799	0.85608	0.08092		0.00125138	0.00231656	0.858111	0.0747493
					0.00125138			0.00250276	0.00233893	0.867984	0.103765		0.00671573	0.00153452	0.856438	0.0479195		0.00333701	0.00205057	0.859417	0.0829705		0.00250276	0.00231656	0.860614	0.0770658
					0.00125138			0.00500552	0.00233893	0.87299	0.106104		0.00216906	0.0015837	0.858607	0.0495032		0.00250276	0.00210314	0.861919	0.0850737		0.00517237	0.00235392	0.865786	0.0794198
					0.00333701			0.00213569	0.00245739	0.875126	0.108562		0.000709115	0.00161476	0.859316	0.0511179		0.000500552	0.00210314	0.86242	0.0871768		0.00333701	0.00243239	0.869123	0.0818522
					0.0013348			0.000650717	0.00248162	0.875776	0.111043		0.00333701	0.00171568	0.862653	0.0528336		0.000709115	0.00222686	0.863129	0.0894037		0.00208563	0.00250189	0.871209	0.084354
					0.00250276			0.000634032	0.00254693	0.87641	0.11359		0.000650717	0.00175967	0.863304	0.0545933		0.00208563	0.0022714	0.865215	0.0916751		0.00208563	0.00250189	0.873294	0.0868559
					0.00333701			0.00291988	0.00255785	0.87933	0.116148		0.000319519	0.00179183	0.863624	0.0563851		0.00618181	0.00229898	0.871396	0.0939741		0.00671573	0.00250361	0.88001	0.0893595
					0.00250276			0.00521408	0.00263251	0.884544	0.118781		0.000634032	0.00180598	0.864258	0.0581911		0.00671573	0.00235134	0.878112	0.0963254		0.00834253	0.00257138	0.888353	0.0919309
					0.00817568			0.00208563	0.00270993	0.88663	0.121491		0.000625689	0.00183006	0.864883	0.0600211		0.00173525	0.0024267	0.879847	0.0987521		0.00386676	0.00269891	0.892219	0.0946298
					0.000583977			0.00125138	0.0027422	0.887881	0.124233		0.000312845	0.00183006	0.865196	0.0618512		0.00333701	0.00252377	0.883184	0.101276		0.00166851	0.00277987	0.893888	0.0974097
					0.000834253			0.0104282	0.00274865	0.898309	0.126981		0.00250276	0.00183006	0.867699	0.0636813		0.000417126	0.00252377	0.883602	0.1038		0.00333701	0.00295361	0.897225	0.100363
					0.000417126			0.000709115	0.00284657	0.899019	0.129828		0.00618181	0.00185229	0.873881	0.0655335		0.0104282	0.00257425	0.89403	0.106374		0.000570212	0.00305034	0.897795	0.103414
					0.000717457			0.00173525	0.00290815	0.900754	0.132736		0.00542264	0.00190044	0.879303	0.067434		0.00213569	0.00271108	0.896165	0.109085		0.000375414	0.00308875	0.898171	0.106502
					0.000734142			0.00089265	0.00293968	0.901646	0.135676		0.00145994	0.00196078	0.880763	0.0693948		0.000375414	0.00280419	0.896541	0.111889		0.000717457	0.00323241	0.898888	0.109735
					0.00834253			0.00333701	0.00296399	0.904983	0.13864		0.00145994	0.00196078	0.882223	0.0713555		0.00208563	0.00302853	0.898626	0.114918		0.00554778	0.0032397	0.904436	0.112975
					0.000408784			0.00145994	0.00304176	0.906443	0.141682		0.000570212	0.00200811	0.882794	0.0733637		0.000333701	0.00315472	0.89896	0.118072		0.00250276	0.00324319	0.906938	0.116218
					0.000400441			0.00123052	0.00311675	0.907674	0.144798		0.000850938	0.00201845	0.883644	0.0753821		0.00333701	0.00315472	0.902297	0.121227		0.00139696	0.00332024	0.908335	0.119538
					0.00533922			0.00112624	0.00322611	0.9088	0.148025		0.00112624	0.0020334	0.884771	0.0774155		0.00345381	0.00320044	0.905751	0.124428		0.00238179	0.0034079	0.910717	0.122946
					0.000654888			0.000625689	0.00322611	0.909426	0.151251		0.00139696	0.00204918	0.886168	0.0794647		0.00158508	0.00332075	0.907336	0.127748		0.000667402	0.00347484	0.911385	0.126421
					0.00488038			0.00740816	0.00340595	0.916834	0.154657		0.00333701	0.00205882	0.889505	0.0815235		0.000634032	0.00332075	0.90797	0.131069		0.000500552	0.00347484	0.911885	0.129896
					0.00321187			0.00158508	0.00343836	0.918419	0.158095		0.00400441	0.0021446	0.893509	0.0836681		0.00125138	0.00336503	0.909221	0.134434		0.00115127	0.0035252	0.913036	0.133421
					0.0065906			0.000570212	0.00353999	0.918989	0.161635		0.00238179	0.00216338	0.895891	0.0858315		0.00521408	0.00343233	0.914436	0.137866		0.000625689	0.0037065	0.913662	0.137127
					0.00340375			0.00125138	0.00354872	0.920241	0.165184		0.00250276	0.00228757	0.898394	0.088119		0.00089265	0.003538	0.915328	0.141404		0.00123052	0.00376932	0.914893	0.140897
					0.00229419			0.000834253	0.00362938	0.921075	0.168813		0.000250276	0.00228757	0.898644	0.0904066		0.00333701	0.00362792	0.918665	0.145032		0.000917678	0.00379074	0.91581	0.144687
					0.00196049			0.00333701	0.00375036	0.924412	0.172563		0.00521408	0.00230587	0.903858	0.0927125		0.000850938	0.00371143	0.919516	0.148744		0.00145994	0.00397125	0.91727	0.148659
					0.00333701			0.00208563	0.00377455	0.926498	0.176338		0.00208563	0.00247058	0.905944	0.0951831		0.000917678	0.00401509	0.920434	0.152759		0.00740816	0.00406963	0.924678	0.152728
					0.00250276			0.000917678	0.00395932	0.927415	0.180297		0.00250276	0.00251633	0.908446	0.0976994		0.00116795	0.00405606	0.921602	0.156815		0.00542264	0.00416981	0.930101	0.156898
					0.0267962			0.00333701	0.00423427	0.930752	0.184532		0.00204392	0.002521	0.91049	0.10022		0.00115127	0.00411485	0.922753	0.16093		0.00208563	0.00416981	0.932187	0.161068
					0.00989841			0.00463844	0.00426473	0.935391	0.188796		0.00213569	0.00268075	0.912626	0.102901		0.000763341	0.00413733	0.923516	0.165067		0.000542264	0.00427673	0.932729	0.165345
					0.0264875			0.000763341	0.0044954	0.936154	0.193292		0.00554778	0.00268317	0.918174	0.105584		0.000625689	0.00420629	0.924142	0.169273		0.00213569	0.00434355	0.934865	0.169688
					0.00762507			0.00333701	0.00471819	0.939491	0.19801		0.000625689	0.00274509	0.918799	0.108329		0.000250276	0.00420629	0.924392	0.17348		0.000763341	0.00455717	0.935628	0.174245
					0.00638203			0.00115127	0.0049093	0.940642	0.202919		0.00208563	0.00274509	0.920885	0.111074		0.00123052	0.00427758	0.925623	0.177757		0.00250276	0.00463312	0.938131	0.178878
					0.0123469			0.000850938	0.0049815	0.941493	0.207901		0.00208563	0.00274509	0.922971	0.11382		0.000717457	0.00440193	0.92634	0.182159		0.00112624	0.00463312	0.939257	0.183511
					0.000988589			0.00386676	0.00501144	0.94536	0.212912		0.00834253	0.00288234	0.931313	0.116702		0.00208563	0.00454279	0.928426	0.186702		0.00173525	0.00467767	0.940992	0.188189
					0.00517237			0.00145994	0.00511569	0.94682	0.218028		0.00115127	0.00298379	0.932465	0.119686		0.000570212	0.00461553	0.928996	0.191318		0.0010011	0.00521226	0.941993	0.193401
					0.000570212			0.0010011	0.00524243	0.947821	0.22327		0.00740816	0.0031686	0.939873	0.122854		0.00740816	0.00461839	0.936404	0.195936		0.000333701	0.00521226	0.942327	0.198614
					0.00187707			0.00250276	0.00524243	0.950324	0.228513		0.00173525	0.00329938	0.941608	0.126154		0.00112624	0.00467365	0.937531	0.20061		0.000319519	0.00544362	0.942647	0.204057
					0.00208563			0.00333701	0.0052626	0.953661	0.233775		0.00158508	0.00361196	0.943193	0.129766		0.00250276	0.00483723	0.940033	0.205447		0.000625689	0.00555975	0.943272	0.209617
					0.00112624			0.000717457	0.00534559	0.954378	0.239121		0.00221077	0.00362559	0.945404	0.133391		0.000625689	0.00504755	0.940659	0.210494		0.00089265	0.00584553	0.944165	0.215463
					0.0109704			0.00204392	0.00543172	0.956422	0.244553		0.00125138	0.00366012	0.946655	0.137051		0.0013348	0.00512641	0.941994	0.215621		0.00333701	0.00642846	0.947502	0.221891
					0.000250276			0.000250276	0.0056457	0.956672	0.250198		0.000917678	0.00436718	0.947573	0.141419		0.0010011	0.00525786	0.942995	0.220879		0.00125138	0.00648637	0.948753	0.228377
					0.00500552			0.00417126	0.00600057	0.960844	0.256199		0.00463844	0.00444349	0.952211	0.145862		0.00139696	0.00565193	0.944392	0.226531		0.000446325	0.00649503	0.9492	0.234872
					0.00208563			0.00116795	0.00604896	0.962012	0.262248		0.00089265	0.00448963	0.953104	0.150352		0.00204392	0.00592314	0.946436	0.232454		0.0013348	0.00651533	0.950534	0.241388
					0.00145264			0.00187707	0.00623715	0.963889	0.268485		0.000763341	0.00450014	0.953867	0.154852		0.000408784	0.0064382	0.946845	0.238892		0.00463844	0.0066247	0.955173	0.248012
					9.17678e-05			0.00221077	0.00630005	0.9661	0.274785		0.000625689	0.00457514	0.954493	0.159427		0.00463844	0.00669526	0.951483	0.245587		0.00208563	0.00667169	0.957259	0.254684
					0.00089265			0.00229419	0.00633491	0.968394	0.28112		0.000250276	0.00457514	0.954743	0.164002		0.000542264	0.00679477	0.952025	0.252382		0.00145994	0.00675112	0.958718	0.261435
					0.000709115			0.00139696	0.00635782	0.969791	0.287478		0.00386676	0.00473801	0.95861	0.16874		0.00333701	0.00694038	0.955362	0.259322		0.000250276	0.00694968	0.958969	0.268385
					0.000542264			0.000250276	0.00725875	0.970041	0.294736		0.000333701	0.00514704	0.958944	0.173887		0.00386676	0.00694242	0.959229	0.266265		0.000250276	0.00694968	0.959219	0.275335
					0.0254447			0.000988589	0.00735064	0.97103	0.302087		0.000717457	0.00558593	0.959661	0.179473		0.000734142	0.00716981	0.959963	0.273435		0.00158508	0.00731546	0.960804	0.28265
					0.00333701			0.0013348	0.00740998	0.972364	0.309497		0.000408784	0.00560222	0.96007	0.185075		0.00187707	0.00757132	0.96184	0.281006		0.000625689	0.00741299	0.96143	0.290063
					0.0116795			0.000312845	0.00774267	0.972677	0.31724		0.00187707	0.00579518	0.961947	0.19087		0.000542264	0.00776546	0.962383	0.288771		0.000542264	0.00748427	0.961972	0.297547
					0.00729971			0.00145264	0.00805949	0.97413	0.325299		0.000667402	0.00600488	0.962614	0.196875		0.00417126	0.00807607	0.966554	0.296847		0.00229419	0.00758147	0.964266	0.305129
					0.0013348			0.000333701	0.00846855	0.974464	0.333768		0.000625689	0.0064052	0.96324	0.203281		0.000644043	0.00817284	0.967198	0.30502		0.00333701	0.00781839	0.967603	0.312947
					0.000763341			0.000625689	0.0087105	0.975089	0.342478		0.00417126	0.00658821	0.967411	0.209869		0.00125138	0.00841258	0.968449	0.313433		0.000408784	0.00850982	0.968012	0.321457
					0.00216906			0.00187707	0.0087105	0.976966	0.351189		0.00116795	0.00686272	0.968579	0.216731		0.000312845	0.00841258	0.968762	0.321845		0.00250276	0.00903459	0.970515	0.330492
					0.00123052			0.00125972	0.00881306	0.978226	0.360002		0.0013348	0.00686272	0.969914	0.223594		0.000250276	0.00841258	0.969012	0.330258		0.00221077	0.00917883	0.972726	0.33967
					0.00166851			0.000542264	0.00893385	0.978768	0.368936		0.000400441	0.00714866	0.970315	0.230743		0.00145264	0.00905877	0.970465	0.339317		0.000312845	0.00926624	0.973038	0.348937
					0.00145994			0.00069243	0.009037	0.979461	0.377973		0.0010011	0.00743461	0.971316	0.238177		0.000625689	0.00925383	0.971091	0.348571		0.000644043	0.0099024	0.973682	0.358839
					0.000417126			0.000533922	0.00907344	0.979995	0.387046		0.00333701	0.00789212	0.974653	0.24607		0.00187707	0.00925383	0.972968	0.357824		0.00116795	0.00992812	0.97485	0.368767
					0.000417126			0.000319519	0.00947618	0.980314	0.396522		0.00145264	0.00827664	0.976105	0.254346		0.00104282	0.00959034	0.974011	0.367415		0.00104282	0.0100075	0.975893	0.378775
					0.00208563			0.000400441	0.00957752	0.980715	0.4061		0.000446325	0.00897926	0.976552	0.263325		0.00069243	0.00988224	0.974703	0.377297		0.000400441	0.010135	0.976294	0.38891
					0.00345381			0.00104282	0.00967834	0.981757	0.415778		0.000583977	0.00980388	0.977136	0.273129		0.000319519	0.00988423	0.975022	0.387181		0.00125972	0.0105856	0.977553	0.399495
					0.0125138			0.00125138	0.00967834	0.983009	0.425457		0.00229419	0.00998213	0.97943	0.283111		0.000583977	0.00991482	0.975606	0.397096		0.00187707	0.0108106	0.97943	0.410306
					0.00208563			0.000644043	0.0103428	0.983653	0.435799		0.000988589	0.0104244	0.980418	0.293536		0.000667402	0.0102528	0.976274	0.407349		0.000250276	0.0115828	0.979681	0.421889
					0.00417126			0.000408784	0.0103696	0.984062	0.446169		0.000542264	0.010558	0.980961	0.304094		0.00125972	0.0104461	0.977534	0.417795		0.00183536	0.0116881	0.981516	0.433577
					0.00125138			0.00183536	0.0104482	0.985897	0.456617		0.000734142	0.010918	0.981695	0.315012		0.000988589	0.0106488	0.978522	0.428444		0.000850938	0.0122641	0.982367	0.445841
					0.000625689			0.000291988	0.011061	0.986189	0.467678		0.00187707	0.0109803	0.983572	0.325992		0.000291988	0.0108162	0.978814	0.43926		0.00145264	0.0123727	0.98382	0.458214
					0.000834253			0.000734142	0.0112731	0.986923	0.478951		0.000654888	0.011365	0.984227	0.337357		0.00229419	0.0110128	0.981108	0.450273		0.000654888	0.0132796	0.984475	0.471493
					0.00125138			0.000667402	0.0120979	0.98759	0.491049		0.000644043	0.0115564	0.984871	0.348914		0.000533922	0.0118302	0.981642	0.462103		0.000291988	0.0138994	0.984767	0.485393
					0.00250276			0.000625689	0.0125818	0.988216	0.503631		0.000834253	0.0116666	0.985705	0.36058		0.000400441	0.0118302	0.982043	0.473933		0.00187707	0.0142082	0.986644	0.499601
					0.0298788			0.000542264	0.0126563	0.988758	0.516287		0.00183536	0.0124777	0.98754	0.373058		0.00333701	0.0123034	0.98538	0.486237		0.00112624	0.0149289	0.98777	0.51453
					0.000625689			0.000834253	0.0137916	0.989593	0.530079		0.00125972	0.0127256	0.9888	0.385783		0.00183536	0.0129057	0.987215	0.499142		0.00069243	0.0150716	0.988462	0.529601
					0.000834253			0.000258618	0.0148297	0.989851	0.544909		0.000258618	0.0132827	0.989059	0.399066		0.000834253	0.0138808	0.988049	0.513023		0.000533922	0.0152024	0.988996	0.544804
					0.00417126			0.000583977	0.0152088	0.990435	0.560117		0.00213986	0.0133776	0.991199	0.412444		0.000258618	0.0142471	0.988308	0.52727		0.00145577	0.0163288	0.990452	0.561133
					0.00156422			0.00213986	0.0165079	0.992575	0.576625		0.000533922	0.0139399	0.991733	0.426384		0.000654888	0.0144675	0.988963	0.541738		0.00213986	0.0165275	0.992592	0.57766
					0.000250276			0.00145577	0.0173323	0.994031	0.593958		0.00069243	0.0140562	0.992425	0.44044		0.00221077	0.015476	0.991174	0.557214		0.000988589	0.0175941	0.99358	0.595254
					0.0125138			0.00179781	0.0183013	0.995829	0.612259		0.00125138	0.016013	0.993676	0.456453		0.000446325	0.0165107	0.99162	0.573724		0.000834253	0.0180692	0.994415	0.613323
					0.00333701			0.000446325	0.0185426	0.996275	0.630801		0.00145577	0.016911	0.995132	0.473364		0.00179781	0.0166885	0.993418	0.590413		0.000417126	0.0194591	0.994832	0.632783
					0.00250276			8.34253e-05	0.0193567	0.996358	0.650158		0.000417126	0.0178431	0.995549	0.491207		0.00145577	0.020248	0.994874	0.610661		0.000417126	0.0194591	0.995249	0.652242
					0.0104282			0.000417126	0.0212923	0.996776	0.67145		0.00179781	0.018152	0.997347	0.509359		0.00213986	0.0204165	0.997013	0.631077		0.000258618	0.0201765	0.995508	0.672418
					0.00417126			0.00112624	0.0225828	0.997902	0.694033		8.34253e-05	0.0205882	0.997431	0.529947		0.000417126	0.022714	0.997431	0.653791		8.34253e-05	0.020849	0.995591	0.693267
					0.00500552			0.000654888	0.0228088	0.998557	0.716842		0.00112624	0.021859	0.998557	0.551806		8.34253e-05	0.0252377	0.997514	0.679029		8.34253e-05	0.020849	0.995674	0.714116
					0.00213986			0.000417126	0.0295189	0.998974	0.746361		7.09115e-05	0.0242214	0.998628	0.576027		0.00112624	0.0289767	0.99864	0.708006		0.000583977	0.020849	0.996258	0.734965
					0.00386676			0.000417126	0.0309707	0.999391	0.777332		0.000250276	0.0274509	0.998878	0.603478		0.000417126	0.0302853	0.999057	0.738291		0.00179781	0.0209619	0.998056	0.755927
					0.00183536			9.17678e-05	0.0373936	0.999483	0.814725		0.000417126	0.032941	0.999295	0.636419		0.000250276	0.0378566	0.999308	0.776147		0.00125138	0.0231656	0.999308	0.779093
					0.00463844			0.000250276	0.0379068	0.999733	0.852632		0.000417126	0.0439214	0.999712	0.680341		0.000417126	0.0403804	0.999725	0.816528		7.09115e-05	0.0245283	0.999378	0.803621
					0.00746656			7.09115e-05	0.0426985	0.999804	0.895331		0.000112624	0.0813359	0.999825	0.761677		7.09115e-05	0.0445372	0.999796	0.861065		0.000112624	0.056627	0.999491	0.860248
					0.00221077			0.000112624	0.0465994	0.999917	0.94193		9.17678e-05	0.0873437	0.999917	0.84902		9.17678e-05	0.0688302	0.999887	0.929895		0.000417126	0.0639371	0.999908	0.924185
					0.00542264			8.34253e-05	0.05807	1	1		8.34253e-05	0.15098	1	1		0.000112624	0.0701048	1	1		9.17678e-05	0.0758147	1	1
					1			1	1				1	1				1	1				1	1
[truncated: 4 more columns]

## Sheet: 表4
province	city	district	center	service area (km^2)	population(10k)	number of health workers	number of doctors	number of nurses	health workers with undergradueate or above
Hebei	A	1	a	6.7	2.98	18	6	5	6
		1	b	6	2	16	5	5	10
		1	c	6	3.7	22	9	3	11
		2	a	8.5	0.5	20	20	10	5
		2	b	22	2.9221	20	14	3	8
		2	c	1.28	9.9093	24	7	7	13
		3	a	1.6	3.2	40	15	12	7
		3	b	10	1.9622	11	11	6	0
		3	c	1	1.2852	64	64	18	32
	B	1	a	11.112	3.4	28	17	6	8
		1	b	56	5.0368	22	14	10	10
		2	a	6.25	8.9	27	8	8	5
		2	b	91.3	3.2	20	12	6	3
		2	c	4.16	8	25	12	5	10
		3	a	42.5	2.3	22	10	8	3
		3	b	25	1.526	11	3	4	1
		3	c	6	1.03	22	8	7	5
	C	1	a	0.27	0.9	26	10	4	16
		1	b	0.6	1.9441	47	20	17	12
		1	c	1.5	1.13	27	11	9	5
		2	a	8	3	14	14	8	7
		2	b	12	3	27	14	16	10
		2	c	4	0.8	7	7	2	2
		3	a	0.2	4.7	8	10	2	22
		3	b	0.17	2.633	15	8	7	3
		3	c	0.2	3	24	8	13	3
Liaoning	A	1	a	13	13	47	23	14	12
		1	b	3.6	1.2	5	2	2	0
		1	c	1.2	0.8036	4	4	0	1
		2	a	16.1	12	62	28	22	18
		2	b	4	1.74	5	2	2	1
		2	c	0.9	1.0252	4	4	2	0
		3	a	100	12.48	13	13	4	3
		3	b	1.5	1.99	7	7	7	3
		3	c	1.56	2.33	8	2	4	2
	B	1	a	3.5	3.3	13	13	3	1
		1	b	3.8	4.502	27	27	16	10
		1	c	34.2	1.3	15	0	0	2
		2	a	1.66	4.35	31	17	10	17
		2	b	5.12	3.5	26	11	6	10
		2	c	2.04	3.0141	21	21	6	3
		3	a	2.4	4.3405	26	10	7	13
		3	b	9.6	3.7	18	15	7	15
		3	c	2.2	2.8138	18	7	6	7
	C	1	a	2.5	2.2	50	50	23	2
		1	b	8	4.1	78	30	40	10
		1	c	3	2	60	20	20	35
		2	a	13.3	4.2	49	20	27	26
		2	b	20	6	96	32	30	42
		2	c	3.5	5	37	0	0	5
		3	a	15	2.1	22	6	9	1
		3	b	30	3.5	56	14	13	5
		3	c	40	2.5	21	8	11	0
Zhejiang	A	1	a	3.02	12.2	55	36	13	28
		1	b	26.7	3.2457	46	30	15	19
		1	c	4.5	11.9959	81	30	25	36
		2	a	3.49	7.26	125	125	42	43
		2	b	4.31	3.5345	163	60	56	57
		2	c	2.7	8.73414	126	126	33	43
		3	a	5.5	7.0654	72	106	24	40
		3	b	8	8.5	87	38	21	46
		3	c	17.76	19.5	125	125	47	41
	B	1	a	8	6.7	25	8	4	8
		1	b	14.82	9.7	60	37	18	20
		1	c	12.5	4.32	68	38	18	21
	C	1	a	33.45	2.2635	19	7	6	7
		1	b	44.1	5	37	30	7	5
		1	c	18.28	4.6	31	21	7	4
		2	a	33.4	3.43	33	17	13	3
		2	b	62.5	3.0066	50	34	11	9
		2	c	63.065	12.59	57	0	0	6
Fujian	A	1	a	3.349	1.1123	44	15	9	5
		1	b	1.544	6.634	33	13	5	13
		1	c	1.52	0.5759	8	0	2	2
		2	a	1.07	4.9941	41	11	5	7
		2	b	1.3	5.47	34	14	5	10
		2	c	0.766	1.25	15	6	5	1
		3	a	4.9	5	55	35	10	9
		3	b	2.76	5.1583	28	16	4	6
		3	c	1.5	0.95	10	10	3	2
	B	1	a	7.5	4.96	19	6	5	1
		1	b	7.5	4.96	7	7	0	2
		1	c	30	4.8	19	4	2	1
		2	a	21.1	4.4	38	12	11	9
		2	b	17	2.7	13	2	4	3
		2	c	19	4.6	15	4	4	0
		3	a	100	16.5	46	20	10	6
	C	1	a	24.5	3.7	18	7	6	1
		1	b	13.68	3.4	23	9	5	1
		2	a	5	1.26	7	3	3	0
		2	b	80	4.2	30	8	10	3
		2	c	43	2.45	35	15	16	0
		3	a	8	3.1	24	9	1	1
		3	b	7	5	37	15	15	0
		3	c	16.73	3.9	41	20	10
Shandong	A	1	a	0.7	0.7	16	6	5	0
		1	b	5.3	3.81	22	7	2	3
		1	c	2.8	2.16	35	18	8	14
		2	a	5.71	2	24	6	11	9
		2	b	0.75	1.91	12	4	4	1
		2	c	0.62	1.2	19	7	7	6
		3	a	0.8	1.3	14	4	8	3
		3	b	3	1.8	17	5	4	1
		3	c	3	2.12	22	11	7	8
	B	1	a	8	3.5	70	28	32	8
		1	b	3.2	3.864	49	17	17	16
		1	c	6	3	29	12	12	4
		2	a	8	5.85	62	19	25	4
		2	b	6	6.2	65	23	29	8
		2	c	19.6	5.04	39	17	12	6
	C	1	a	1.4	1.4	44	10	10	10
		1	b	2	0.98	5	2	3	1
		1	c	1	0.14	4	2	2	1
Hunan	A	1	a	1.72	6.3	19	19	7	7
		1	b	1.76	11	41	13	8	14
		1	c	20	17.9097	49	11	10	14
		2	a	0.98	4.1	21	4	5	4
		2	b	0.96	3.4	19	7	3	5
		2	c	12.8	10.2	36	36	8	5
		3	a	1.57	4.1	74	43	30	13
		3	b	11.7	3.0153	25	8	6	3
		3	c	7.7	5.6418	26	4	2	5
	B	1	a	15.8	11.28	26	4	6	4
		1	b	8.16	4	5	1	0	1
		1	c	5.5	4.488	7	0	0	1
		2	a	4.7	4.4	9	0	0	0
		2	b	8	5.9	8	8	2	2
		2	c	6	4.7	11	7	1	4
	C	1	a	64.24	6.4	30	7	4	1
		1	b	23.73	13.72	21	3	8	4
		1	c	63.5	5.435	17	3	4	2
		2	a	18.28	1.7	19	9	6	0
		2	b	15.3	8.3	30	7	8	2
		2	c	29.6	1.3707	11	5	3	0
Guangxi	A	1	a	2.37	4.4559	36	12	11	18
		1	b	12.4	10.04	39	11	13	9
		1	c	1.367	1.7	10	5	5	2
		2	a	4.5	8.84	58	27	28	19
		2	b	5	6.2	39	6	9	10
		2	c	2.7	1.8	18	8	6	4
		3	a	26.3	10.1945	59	24	25	24
		3	b	0.6	0.8609	9	4	3	2
		3	c	12	3.8112	58	26	19	13
	B	1	a	5	4	28	9	7	10
		1	b	3.4825	3.1295	58	49	23	21
		2	a	0.22	3.3	17	7	10	14
		2	b	2.14	0.69	13	13	3	7
		2	c	1.7	1.9002	10	10	3	2
		3	a	1.3	1.148	24	22	8	1
		3	b	61	2.354	52	52	14	15
		3	c	8	6.363	49	14	12	12
	C	1	a	28	3.2	75	34	31	3
Guizhou	A	1	a	17.5	1.8	37	37	15	13
		1	b	3.2	2.3	15	4	9	0
		1	c	1.83	1.64	17	6	6	6
		2	a	5.2	3.3	20	6	9	6
		2	b	2.95	4.2987	19	9	9	1
		2	c	4	4.7	16	4	5	3
		3	a	3.5	1.9	22	18	11	5
		3	b	1	2.0147	44			13
		3	c	1	2.5	61	23	25	24
	B	1	a	5	6.656	15	6	5	0
		2	b	8.28	10	14	5	6
		2	c	30	11	53	53	15	7
	C	1	a	5	1.0861	14	4	5	9
		1	b	10	2.5157	15	5	6	3
		1	c	3	1.2	11	3	4	0
		2	a	1.5	0.5702	39	19	10	7
		2	b	2	0.81	15	10	4	0
		2	c	3	3	7	3	2	1
		3	a	6	0.83	19	5	7	0
		3	b	71.63	5.8	11	6	2	2
		3	c	1.5	0.5	3	1	1	0
Ningxia	A	1	a	2	4	57	21	21	17
		1	b	10	30	124	154	90	48
		1	c	3.75	2	7	3	4	3
		2	a	0.6	1.26	7	2	2	1
		3	a	30	5.6029	38	7	9	6
		3	b	8	2.3923	15	4	4	7
		3	c	6	2.1	14	9	3	3
	B	1	a	25	13.5	142	55	57	14
	C	1	a	10	5.05	25	10	6	3
		1	b	12	2.6	25	6	1	1
Beijing	A		a	5.13	7.3	175	86	44	50
			b	9.27	7.9215	96	53	32	32
			c	4.4	8.51	95	45	17	40
	B		a	11.12	24	98	53	17	36
	C		a	17.9	10	49	22	18	20
			b	5.3	9.1699	69	66	14	14
			c	13	3	40	15	12	18

## Sheet: 东部
省	地市	区	区（县）	名	服务面积（平方公里）	服务人口（万人）	2010在岗人员：卫技人员数（人）	人均拥有卫生资源	人均拥有卫生资源百分比	人数百分比		人均拥有卫生资源百分比	人数百分比	人均卫生资源累计百分比	人数累计百分比
n0a	n0b	n0c	n11		n13	n14	n41							0	0
河北	石家庄市	1	裕华	1裕华路街道办事处社区卫生服务中心	6.7	2.98	18	6.04027	0.0191709	0.0359215		0.00540229	0.0566547	0.00540229	0.0566547
		1		2裕兴街道办事处社区卫生服务中心	6	2	16	8	0.0253908	0.0241084		0.00768695	0.119449	0.0130892	0.176103
		1		3裕强街道办事处社区卫生服务中心	6	3.7	22	5.94595	0.0188715	0.0446005		0.00962853	0.107282	0.0227178	0.283386
		2	桥东	1汇通街道办事处社区卫生服务中心	8.5	0.5	20	40	0.126954	0.0060271		0.00991827	0.0964335	0.032636	0.379819
		2		2桃园社区卫生服务中心	22	2.9221	20	6.84439	0.0217231	0.0352236		0.0138629	0.0607145	0.0464989	0.440534
		2		3阜康街道办事处社区卫生服务中心	1.28	9.9093	24	2.42197	0.00768695	0.119449		0.0148113	0.0361626	0.0613102	0.476696
		3	桥西	1裕西街道办事处社区卫生服务中心	1.6	3.2	40	12.5	0.0396731	0.0385734		0.0177924	0.0236527	0.0791027	0.500349
		3		2石铜路社区卫生服务站	10	1.9622	11	5.60595	0.0177924	0.0236527		0.0180812	0.0317387	0.0971838	0.532088
		3		3友谊街道办事处第54所社区卫生服务中心	1	1.2852	64	49.7977	0.15805	0.015492		0.0188715	0.0446005	0.116055	0.576688
	承德市	1	双滦	1钢城街道社区卫生服务中心	11.112	3.4	28	8.23529	0.0261376	0.0409842		0.0191709	0.0359215	0.135226	0.61261
		1		2元宝山街道办事处社区卫生服务中心	56	5.0368	22	4.36785	0.0138629	0.0607145		0.0198365	0.0385734	0.155063	0.651183
		2	双桥	1潘家沟街道办事处社区卫生服务中心	6.25	8.9	27	3.03371	0.00962853	0.107282		0.0217231	0.0352236	0.176786	0.686407
		2	双桥	2新华路街道办事处社区卫生服务中心	120	3.2	20	6.25	0.0198365	0.0385734		0.0228783	0.0183947	0.199664	0.704801
		2	双桥	3西大街道办事处社区卫生服务中心	4.16	8	25	3.125	0.00991827	0.0964335		0.0253908	0.0241084	0.225055	0.72891
		3	营子	1兴煤社区卫生服务中心	42.5	2.3	22	9.56522	0.0303585	0.0277246		0.0253908	0.0361626	0.250446	0.765072
		3	营子	2北马圈子镇社区服务站	25	1.526	11	7.20839	0.0228783	0.0183947		0.0261376	0.0409842	0.276583	0.806057
		3	营子	3寿王坟社区卫生服务中心	60.8	1.03	22	21.3592	0.0677909	0.0124158		0.0277712	0.00964335	0.304354	0.8157
	保定市	1	新市	1新市场街社区卫生服务中心	570	0.9	26	28.8889	0.0916889	0.0108488		0.0285646	0.0361626	0.332919	0.851862
		1	新市	2建南社区卫生服务中心	600	1.9441	47	24.1757	0.07673	0.0234346		0.0303585	0.0277246	0.363278	0.879587
		1	新市	3朝阳社区卫生服务中心	340	1.13	27	23.8938	0.0758353	0.0136212		0.0396731	0.0385734	0.402951	0.91816
		2	南市	1联盟路社区卫生服务中心	8	3	14	4.66667	0.0148113	0.0361626		0.0677909	0.0124158	0.470742	0.930576
		2	南市	2南关社区卫生服务中心	12	3	27	9	0.0285646	0.0361626		0.0758353	0.0136212	0.546577	0.944198
		2	南市	3红阳社区卫生服务站	4	0.8	7	8.75	0.0277712	0.00964335		0.07673	0.0234346	0.623307	0.967632
		3	北市	1西关社区卫生服务中心	0.2	4.7	8	1.70213	0.00540229	0.0566547		0.0916889	0.0108488	0.714996	0.978481
		3	北市	2东关街道社区卫生服务中心	0.17	2.633	15	5.69692	0.0180812	0.0317387		0.126954	0.0060271	0.84195	0.984508
		3	北市	3五四路社区卫生服务中心	0.2	3	24	8	0.0253908	0.0361626		0.15805	0.015492	1	1
					1923.47	82.9587	607	315.075						0	0
辽宁	辽阳市	1	白塔	1西五道街社区卫生服务中心	13	13	47	3.61538	0.0161284	0.121621		0.00464694	0.116756	0.00464694	0.116756
		1	白塔	2电校社区卫生服务中心	3.6	1.2	5	4.16667	0.0185877	0.0112266		0.0128191	0.0162785	0.0174661	0.133035
		1	白塔	3北园社区卫生服务站	1.2	0.8036	4	4.9776	0.0222054	0.00751807		0.0153169	0.0217983	0.032783	0.154833
		2	文圣	1文圣社区卫生服务中心	16.1	12	62	5.16667	0.0230488	0.112266		0.0156922	0.0186174	0.0484752	0.173451
		2	文圣	2东兴街道太子河社区卫生服务站	4	1.74	5	2.87356	0.0128191	0.0162785		0.0161284	0.121621	0.0646036	0.295072
		2	文圣	3文圣社区卫生服务站	0.9	1.0252	4	3.90168	0.0174056	0.00959124		0.0174056	0.00959124	0.0820092	0.304663
		3	宏伟	1工农街道社区卫生服务中心	59.06	12.48	13	1.04167	0.00464694	0.116756		0.0175739	0.0308731	0.0995831	0.335536
		3	宏伟	2长征街道天井园社区卫生服务中心	1.5	1.99	7	3.51759	0.0156922	0.0186174		0.0185877	0.0112266	0.118171	0.346763
		3	宏伟	3荟萃湖社区卫生服务中心	1.56	2.33	8	3.43348	0.0153169	0.0217983		0.0217024	0.0346153	0.139873	0.381378
	大连市	1	中山	1昆明社区卫生服务中心	3.5	3.3	13	3.93939	0.0175739	0.0308731		0.0222054	0.00751807	0.162079	0.388896
		1	中山	2桂林社区卫生服务中心	3.8	4.502	27	5.99733	0.0267545	0.0421184		0.0230488	0.112266	0.185127	0.501162
		1	中山	3老虎滩工疗社区卫生服务中心	34.2	1.3	15	11.5385	0.0514737	0.0121621		0.0267222	0.0406075	0.21185	0.541769
		2	西岗	1日新社区卫生服务中心	1.66	4.35	31	7.12644	0.0317914	0.0406963		0.0267545	0.0421184	0.238604	0.583888
		2	西岗	2人民广场石道街社区卫生服务中心	5.12	3.5	26	7.42857	0.0331393	0.0327442		0.0285376	0.0263245	0.267142	0.610212
		2	西岗	3人民广场长春路社区卫生服务中心	2.04	3.0141	21	6.96725	0.0310813	0.0281984		0.0310813	0.0281984	0.298223	0.638411
		3	沙河口	1春柳社区卫生服务中心	2.4	4.3405	26	5.99009	0.0267222	0.0406075		0.0317914	0.0406963	0.330014	0.679107
		3	沙河口	2李家绿波社区卫生服务中心	9.6	3.7	18	4.86486	0.0217024	0.0346153		0.0330118	0.0467774	0.363026	0.725884
		3	沙河口	3星海湾花园社区卫生服务中心	2.2	2.8138	18	6.39704	0.0285376	0.0263245		0.0331393	0.0327442	0.396166	0.758629
	葫芦岛市	1	连山	1化机街道社区卫生服务中心	2.5	2.2	50	22.7273	0.101388	0.0205821		0.0374729	0.0233887	0.433638	0.782017
		1	连山	2渤海街道社区卫生服务中心	8	4.1	78	19.0244	0.0848689	0.0383575		0.0514737	0.0121621	0.485112	0.794179
		1	连山	3石油街道社区卫生服务中心	3	2	60	30	0.133832	0.018711		0.0520457	0.039293	0.537158	0.833472
		2	龙港	1龙湾街道社区卫生服务中心	13.3	4.2	49	11.6667	0.0520457	0.039293		0.0713769	0.0561329	0.608535	0.889605
		2	龙港	2望葫社区卫生服务中心	20	6	96	16	0.0713769	0.0561329		0.0713769	0.0327442	0.679912	0.922349
		2	龙港	3西街道社区卫生服务中心	3.5	5	37	7.4	0.0330118	0.0467774		0.0848689	0.0383575	0.764781	0.960707
		3	南票	2九龙街道社区卫生服务中心	30	3.5	56	16	0.0713769	0.0327442		0.101388	0.0205821	0.866168	0.981289
		3	南票	3邱皮沟街道社区卫生服务中心	40	2.5	21	8.4	0.0374729	0.0233887		0.133832	0.018711	1	1
					285.74	106.889	797	224.162						0	0
浙江	杭州	1	西湖	1南湲街道社区卫生服务中心	3.02	12.2	55	4.5082	0.0218045	0.0846366		0.0180471	0.0464807	0.0180471	0.0464807
		1	西湖	2袁浦社区卫生服务中心	26.7	3.2457	46	14.1726	0.0685476	0.0225168		0.0201526	0.208123	0.0381998	0.254603
		1	西湖	3留下街道社区卫生服务中心	4.5	11.9959	81	6.75231	0.0326584	0.0832206		0.0218045	0.0846366	0.0600042	0.33924
		2	上城	1紫阳街道社区卫生服务中心	3.49	7.26	125	17.2176	0.0832753	0.0503657		0.0218974	0.0873422	0.0819016	0.426582
		2	上城	2南星街道社区卫生服务中心	4.31	3.5345	163	46.1168	0.22305	0.0245203		0.0299173	0.067293	0.111819	0.493875
		2	上城	3小荔维区社区卫生服务中心	2.7	8.73414	126	14.4261	0.0697739	0.0605924		0.0325947	0.0319121	0.144414	0.525787
		3	江干	1系莎街道社区卫生服务中心	5.5	7.0654	72	10.1905	0.0492877	0.0490157		0.0326584	0.0832206	0.177072	0.609008
		3	江干	2闸弄口街道社区卫生服务中心	8	8.5	87	10.2353	0.0495043	0.0589681		0.0357911	0.0346871	0.212863	0.643695
		3	江干	3彭埠镇社区卫生服务中心		30	125	4.16667	0.0201526	0.208123		0.0405991	0.0157029	0.253462	0.659398
	绍兴市	1	越城	1塔山街道社区卫生服务中心	8	6.7	25	3.73134	0.0180471	0.0464807		0.0465332	0.0237954	0.299995	0.683193
		1	越城	2府山街道社区卫生服务中心	14.82	9.7	60	6.18557	0.0299173	0.067293		0.0492877	0.0490157	0.349283	0.732209
		1	越城	3城南街道社区卫生服务中心	12.5	4.32	68	15.7407	0.0761321	0.0299697		0.0495043	0.0589681	0.398787	0.791177
	舟山市	1	普陀	1展茂中心卫生院	33.45	2.2635	19	8.39408	0.0405991	0.0157029		0.0685476	0.0225168	0.467335	0.813694
		1	普陀	2勾山街道社区卫生服务中心	40.4	5	37	7.4	0.0357911	0.0346871		0.0697739	0.0605924	0.537109	0.874286
		1	普陀	3东港街道社区卫生服务中心	18.28	4.6	31	6.73913	0.0325947	0.0319121		0.0761321	0.0299697	0.613241	0.904256
		2	定海	1盐仑街道卫生院	33.4	3.43	33	9.62099	0.0465332	0.0237954		0.0804335	0.0208581	0.693675	0.925114
		2	定海	2白泉中心卫生院	62.5	3.0066	50	16.6301	0.0804335	0.0208581		0.0832753	0.0503657	0.77695	0.97548
		2	定海	3城市中心社区卫生服务中心		12.59	57	4.5274	0.0218974	0.0873422		0.22305	0.0245203	1	1
					281.57	144.146	1260	206.756						0	0
福建	福州市	1	鼓楼	1华大街道社区卫生服务中心	3.349	1.1123	44	39.5577	0.193179	0.0110047		0.00689201	0.0490727	0.00689201	0.0490727
		1	鼓楼	2南街街道社区卫生服务中心	1.544	6.634	33	4.97437	0.0242923	0.0656347		0.0136146	0.163246	0.0205066	0.212318
		1	鼓楼	3华大街道体育中心社区卫生服务中心	152	0.5759	8	13.8913	0.0678379	0.00569777		0.0159244	0.0455109	0.036431	0.257829
		2	台江	1苍霞街道社区卫生服务中心	1.07	4.9941	41	8.20969	0.0400919	0.04941		0.0187069	0.0490727	0.0551379	0.306902
		2	台江	2瀛洲街道社区卫生服务中心	1.3	5.47	34	6.21572	0.0303544	0.0541184		0.0193305	0.0474897	0.0744683	0.354392
		2	台江	3义洲街道保兴社区卫生服务中心	0.766	1.25	15	12	0.0586018	0.0123671		0.0235131	0.0267129	0.0979814	0.381105
		3	仓山	1上渡社区卫生服务中心	4.9	5	55	11	0.0537183	0.0494684		0.0237575	0.0366066	0.121739	0.417711
		3	仓山	2临江街道社区卫生服务中心	2.76	5.1583	28	5.42814	0.0265083	0.0510346		0.0242923	0.0656347	0.146031	0.483346
		3	仓山	3金山街道社区卫生服务中心	1.5	0.95	10	10.5263	0.0514051	0.009399		0.0265083	0.0510346	0.172539	0.534381
	莆田	1	荔城	1镇海社区卫生服务中心	7.5	4.96	19	3.83065	0.0187069	0.0490727		0.0271305	0.012466	0.19967	0.546847
		1	荔城	2凤山社区卫生服务中心	7.5	4.96	7	1.41129	0.00689201	0.0490727		0.0303544	0.0541184	0.230024	0.600965
		1	荔城	3拱辰社区卫生服务中心	30	4.8	19	3.95833	0.0193305	0.0474897		0.0330353	0.0336385	0.26306	0.634604
		2	城厢	1凤凰山社区卫生服务中心	21.1	4.4	38	8.63636	0.0421755	0.0435322		0.034882	0.0415535	0.297942	0.676157
		2	城厢	2霞林街道社区卫生服务中心	17	2.7	13	4.81481	0.0235131	0.0267129		0.0361378	0.0494684	0.334079	0.725625
		2	城厢	3龙桥街道社区卫生服务中心	19	4.6	15	3.26087	0.0159244	0.0455109		0.0378076	0.0306704	0.371887	0.756296
		3	秀屿	笏石社区卫生服务中心	100	16.5	46	2.78788	0.0136146	0.163246		0.0400919	0.04941	0.411979	0.805706
	南平	1	浦城县	1河滨街道社区卫生服务中心	24.5	3.7	18	4.86486	0.0237575	0.0366066		0.0421755	0.0435322	0.454154	0.849238
		1	浦城县	2南浦街道社区卫生服务中心	13.68	3.4	23	6.76471	0.0330353	0.0336385		0.0513392	0.0385854	0.505494	0.887823
		2	延平	1玉屏山社区卫生服务中心	5	1.26	7	5.55556	0.0271305	0.012466		0.0514051	0.009399	0.556899	0.897222
		2	延平	2水东街道社区卫生服务中心	80	4.2	30	7.14286	0.034882	0.0415535		0.0537183	0.0494684	0.610617	0.946691
		2	延平	3黄墩街道社区卫生服务中心	43	2.45	35	14.2857	0.069764	0.0242395		0.0586018	0.0123671	0.669219	0.959058
		3	邵武市	1昭阳街道社区卫生服务中心	8	3.1	24	7.74194	0.0378076	0.0306704		0.0678379	0.00569777	0.737057	0.964756
		3	邵武市	2水北街道社区卫生服务中心	7	5	37	7.4	0.0361378	0.0494684		0.069764	0.0242395	0.806821	0.988995
		3	邵武市	3通泰街道社区卫生服务中心	16.73	3.9	41	10.5128	0.0513392	0.0385854		0.193179	0.0110047	1	1
					569.199	101.075	640	204.772						0	0
山东	济南	1	天桥	1制锦市办事处社区卫生服务中心	0.7	0.7	16	22.8571	0.101119	0.00200876		0.00101533	0.875245	0.00101533	0.875245
		1	天桥	2北园街道办事处社区卫生服务站	5.3	3.81	22	5.77428	0.0255452	0.0109334		0.0225712	0.00281226	0.0235866	0.878057
		1	天桥	3工人新村北村街道办事处	2.8	2.16	35	16.2037	0.0716845	0.00619845		0.0255452	0.0109334	0.0491317	0.88899
		2	槐荫	1匡山办事处社区卫生服务中心	5.71	2	24	12	0.0530875	0.00573931		0.0277945	0.00548104	0.0769262	0.894471
		2	槐荫	2青年公园办事处岔路街社区卫生服务中心	0.75	1.91	12	6.28272	0.0277945	0.00548104		0.034233	0.0144631	0.111159	0.908934
		2	槐荫	3道德街办事处新世界阳光社区卫生服务中心	0.62	1.2	19	15.8333	0.070046	0.00344359		0.0417818	0.00516538	0.152941	0.9141
		3	历下	1泉城路办事处芙蓉街道社区卫生服务站	0.8	1.3	14	10.7692	0.0476426	0.00373055		0.0427649	0.00860896	0.195706	0.922709
		3	历下	2东关办事处社区卫生服务中心	3	1.8	17	9.44444	0.0417818	0.00516538		0.045909	0.00608367	0.241615	0.928792
		3	历下	3燕山办事处社区卫生服务中心	3	2.12	22	10.3774	0.045909	0.00608367		0.0463802	0.0177919	0.287995	0.946584
	济宁	1	市中	1山推社区卫生服务中心	8	305	70	0.229508	0.00101533	0.875245		0.0468864	0.0167875	0.334882	0.963372
		1	市中	2电力社区卫生服务中心	3.2	3.864	49	12.6812	0.0561009	0.0110883		0.0476426	0.00373055	0.382524	0.967102
		1	市中	3樱花社区卫生服务中心	6	3	29	9.66667	0.0427649	0.00860896		0.0530875	0.00573931	0.435612	0.972842
		2	任城	1众和社区卫生服务中心	8	5.85	62	10.5983	0.0468864	0.0167875		0.0561009	0.0110883	0.491713	0.98393
		2	任城	2鲁抗社区卫生服务中心	6	6.2	65	10.4839	0.0463802	0.0177919		0.070046	0.00344359	0.561759	0.987374
		2	任城	3永康社区卫生服务中心	176.66	5.04	39	7.7381	0.034233	0.0144631		0.0716845	0.00619845	0.633443	0.993572
	滨州	1	滨城	1市中街道办事处社区	1.4	1.4	44	31.4286	0.139039	0.00401752		0.101119	0.00200876	0.734562	0.995581
		1	滨城	2市西办事处春晖社区	2	0.98	5	5.10204	0.0225712	0.00281226		0.126399	0.000401752	0.860961	0.995982
		1	滨城	3北镇街道办事处天虹社区卫生服务站	1	0.14	4	28.5714	0.126399	0.000401752		0.139039	0.00401752	1	1
					234.94	348.474	548	226.042						0	0
北京	朝阳	1	朝阳	1亚运村社区卫生服务中心	5.13	7.3	175	23.9726	0.357851	0.104433		0.015787	0.121743	0.015787	0.121743
		1	朝阳	2三里屯社区卫生服务中心	9.27	7.9215	96	12.1189	0.180905	0.113324		0.060954	0.343341	0.0767411	0.465084
		1	朝阳	3十一里庄社区卫生服务中心	4.4	8.51	9	1.05758	0.015787	0.121743		0.0731448	0.143059	0.149886	0.608142
	顺义	2	顺义	城区社区卫生服务中心	11.12	24	98	4.08333	0.060954	0.343341		0.112324	0.131183	0.26221	0.739326
	石景山	3	石景山	1金顶街社区卫生服务中心	17.9	10	49	4.9	0.0731448	0.143059		0.180905	0.113324	0.443115	0.85265
		3	石景山	2八宝山社区卫生服务中心	5.3	9.1699	69	7.52462	0.112324	0.131183		0.199034	0.0429176	0.642149	0.895567
		3	石景山	3五里坨街道社区卫生服务中心	13	3	40	13.3333	0.199034	0.0429176		0.357851	0.104433	1	1
					66.12	69.9014	536	66.9904

## Sheet: 中部
区	名	服务面积（平方公里）	服务人口（万人）	2010在岗人员：卫技人员数（人）	人均拥有卫生资源	人均拥有卫生资源百分比	人均卫生资源累计百分比	2倍的梯形面积	人数百分比	人数累计百分比					人数累计百分比	人均卫生资源累计百分比	2倍的梯形面积
1	1侯家塘社区卫生服务中心	1.72	6.3	19	3.01587	0.0308733	0.0308733	0.00147016	0.0458647	0.0458647		0			0	0	0
1	2洞井社区卫生服务中心		11	41	3.72727	0.0381559	0.0690291	0.00475726	0.0800812	0.125946		0.0291205	0.0291205	0.0127962	0.0291205	0.0127962	0.000609341
1	3雨花亭街道社区卫生服务中心	20	17.9097	49	2.73595	0.0280077	0.0970369	0.00790791	0.130385	0.256331		0.0720731	0.0429527	0.0138806	0.0720731	0.0266768	0.00187966
2	1坡子街街道社区卫生服务中心	0.98	4.1	21	5.12195	0.0524331	0.14947	0.0117384	0.0298485	0.286179		0.171956	0.0998832	0.0156688	0.171956	0.0423455	0.00328678
2	2书院路街道社区卫生服务中心	0.96	3.4	19	5.58824	0.0572064	0.206676	0.0169593	0.0247524	0.310931		0.204629	0.0326731	0.0159667	0.204629	0.0583122	0.00479323
2	3新铺社区卫生服务中心	12.8	10.2	36	3.52941	0.0361304	0.242807	0.021404	0.0742572	0.385189		0.236662	0.0320325	0.0209392	0.236662	0.0792514	0.00655065
3	1望月湖社区卫生服务中心	1.57	4.1	74	18.0488	0.184764	0.427571	0.0319227	0.0298485	0.415037		0.318782	0.0821197	0.0235958	0.318782	0.102847	0.00867136
3	2望岳社区卫生服务中心	11.7	3.0153	25	8.29105	0.0848749	0.512446	0.0447627	0.0219517	0.436989		0.352998	0.0342165	0.0239588	0.352998	0.126806	0.0109359
3	3银盆岭社区卫生服务中心	7.7	5.6418	26	4.60846	0.0471765	0.559622	0.0510509	0.0410729	0.478062		0.483383	0.130385	0.0280077	0.483383	0.154814	0.0134105
1	1燕泉街道社区卫生服务中心	15.8	11.28	26	2.30496	0.0235958	0.583218	0.054421	0.0821197	0.560181		0.529247	0.0458647	0.0308733	0.529247	0.185687	0.0162143
1	2下湄桥街道社区卫生服务中心	8.16	4	5	1.25	0.0127962	0.596014	0.0561539	0.0291205	0.589302		0.568815	0.0395674	0.0320199	0.568815	0.217707	0.0192092
1	3人民路街道社区卫生服务中心	5.5	4.488	7	1.55971	0.0159667	0.611981	0.0575236	0.0326731	0.621975		0.643072	0.0742572	0.0361304	0.643072	0.253837	0.0224545
2	1南塔街道社区卫生服务中心	4.7	4.4	9	2.04545	0.0209392	0.63292	0.059281	0.0320325	0.654008		0.703497	0.0604249	0.037001	0.703497	0.290838	0.0259369
2	2苏仙岭街道社区卫生服务中心	8	5.9	8	1.35593	0.0138806	0.646801	0.0609391	0.0429527	0.69696		0.783578	0.0800812	0.0381559	0.783578	0.328994	0.0295158
2	3岭街道白鹿洞社区卫生服务中心	6	4.7	11	2.34043	0.0239588	0.67076	0.062741	0.0342165	0.731177		0.824651	0.0410729	0.0471765	0.824651	0.376171	0.0335793
1	1峒河街道社区卫生服务中心	64.24	6.4	30	4.6875	0.0479856	0.718745	0.0661669	0.0465927	0.777769		0.871244	0.0465927	0.0479856	0.871244	0.424156	0.0381108
1	2镇溪街道社区卫生服务中心	23.73	13.72	21	1.53061	0.0156688	0.734414	0.0691981	0.0998832	0.877653		0.901092	0.0298485	0.0524331	0.901092	0.476589	0.0428926
1	3乾州街道社区卫生服务中心	63.5	5.435	17	3.12787	0.0320199	0.766434	0.0714689	0.0395674	0.91722		0.925845	0.0247524	0.0572064	0.925845	0.533796	0.0481136
2	1华塘社区卫生服务中心	18.28	1.7	19	11.1765	0.114413	0.880847	0.0784419	0.0123762	0.929596		0.935824	0.00997885	0.0821524	0.935824	0.615948	0.0547497
2	2民安社区卫生服务中心	15.3	8.3	30	3.61446	0.037001	0.917848	0.0856521	0.0604249	0.990021		0.957775	0.0219517	0.0848749	0.957775	0.700823	0.0627034
2	3新城社区卫生服务中心	29.6	1.3707	11	8.0251	0.0821524	1	0.0913261	0.00997885	1		0.970152	0.0123762	0.114413	0.970152	0.815236	0.0721933
												1	0.0298485	0.184764	1	1	0.0864398
													F(x)=5.93542857*x^7-17.57833*x^6+20.012*x^5-10.8585*x^4+2.8803*x^3-0.17365*x^2+0.0088x
														0.226049
														0.273951
														0.547903
			137.361	504	97.6855	1

## Sheet: 西部
省	地市	区	区（县）	名	服务面积（平方公里）	服务人口（万人）	2010在岗人员：卫技人员数（人）	人均拥有卫生资源	人均拥有卫生资源百分比	人数百分比		人均拥有卫生资源百分比	人数百分比	人均卫生资源累计百分比	人数累计百分比
														0	0
广西	桂林	1	象山	1桂林市人民医院象山社区卫生服务中心.	2.37	4.4559	36	8.07918	0.040179	0.0602253		0.019318	0.135699	0.019318	0.135699
		1	象山	2平山社区卫生服务中心	12.4	10.04	39	3.88446	0.019318	0.135699		0.0256193	0.0446023	0.0449373	0.180301
		1	象山	3南门街道办事处翠竹社区卫生服中心	1.367	1.7	10	5.88235	0.0292539	0.0229769		0.0261717	0.0256828	0.0711091	0.205984
		2	叠彩	1叠彩街道办事处社区卫生服务中心	4.5	8.84	58	6.56109	0.0326293	0.11948		0.0287818	0.137787	0.0998909	0.343772
		2	叠彩	2北门街道办事处北门社区卫生服务中心	5	6.2	39	6.29032	0.0312828	0.0837983		0.0292539	0.0229769	0.129145	0.366749
		2	叠彩	3节海社区卫生服务中心	2.7	1.8	18	10	0.0497316	0.0243285		0.0312828	0.0837983	0.160427	0.450547
		3	七星	1东江社区卫生服务中心	26.3	10.1945	59	5.78743	0.0287818	0.137787		0.0326293	0.11948	0.193057	0.570027
		3	七星	2宸东社区卫生服务中心		0.8609	9	10.4542	0.0519902	0.0116358		0.0348121	0.0540634	0.227869	0.62409
		3	七星	3七星社区卫生服务	12	3.8112	58	15.2183	0.075683	0.0515116		0.0382971	0.0860014	0.266166	0.710092
	南宁	1	西乡塘	1衡阳南铁社区卫生服务中心	5	4	28	7	0.0348121	0.0540634		0.040179	0.0602253	0.306345	0.770317
		1	西乡塘	2北湖南棉社区卫生服务中心	3.4825	3.1295	58	18.5333	0.092169	0.0422979		0.0497316	0.0243285	0.356077	0.794646
		2	兴宁	1长钢社区卫生服务站	0.22	3.3	17	5.15152	0.0256193	0.0446023		0.0519902	0.0116358	0.408067	0.806281
		2	兴宁	2朝阳社区卫生服务中心	2.14	0.69	13	18.8406	0.0936971	0.00932594		0.075683	0.0515116	0.48375	0.857793
		2	兴宁	3望州南社区卫生服务中心	1.7	1.9002	10	5.2626	0.0261717	0.0256828		0.092169	0.0422979	0.575919	0.900091
		3	江南	1淡村路西社区卫生服务中心	1.3	1.148	24	20.9059	0.103968	0.0155162		0.0936971	0.00932594	0.669616	0.909417
		3	江南	2沙井卫生院	320.192	2.354	52	22.0901	0.109857	0.0318163		0.103968	0.0155162	0.773584	0.924933
		3	江南	3亭子社区卫生服务中心		6.363	49	7.70077	0.0382971	0.0860014		0.109857	0.0318163	0.883442	0.956749
	来宾	1	兴宾	华侨社区卫生服务中心	28	3.2	75	23.4375	0.116558	0.0432507		0.116558	0.0432507	1	1
					428.672	73.9872	652	201.08						0	0
贵州	贵阳	1	南明	1龙洞街道办事处社区卫生服务中心	17.5	1.8	37	20.5556	0.0770339	0.0263076		0.00524663	0.146153	0.00524663	0.146153
		1	南明	2新华办事处社区卫生服务中心	3.2	2.3	15	6.52174	0.0244408	0.0336152		0.00710751	0.0847688	0.0123541	0.230922
		1	南明	3遵义路街道办事处社区卫生服务中心	1.83	1.64	17	10.3659	0.038847	0.0239691		0.0084456	0.0972795	0.0207997	0.328201
		2	白云	1艳山红街道办事处社区卫生服务中心	5.2	3.3	20	6.06061	0.0227127	0.0482305		0.00874439	0.0438459	0.0295441	0.372047
		2	白云	2天山洞街道办事处社区卫生服务中心	2.95	4.2987	24	5.58308	0.0209231	0.0628268		0.0127578	0.068692	0.0423019	0.440739
		2	白云	3龚家寨街道办事处社区卫生服务中心	4	4.7	16	3.40426	0.0127578	0.068692		0.0180566	0.160768	0.0603585	0.601508
		3	小河	1黄河社区卫生服务中心	3.5	1.9	22	11.5789	0.0433932	0.0277691		0.0209231	0.0628268	0.0812817	0.664335
		3	小河	2黄河街道办事处社区卫生服务中心	2400	2.0147	44	21.8395	0.0818456	0.0294455		0.0223452	0.0367677	0.103627	0.701102
		3	小河	3长江街道办事处社区卫生服务中心	1	2.5	61	24.4	0.0914413	0.0365383		0.0224856	0.00730766	0.126112	0.70841
	六盘水	1	六枝特区	第一社区卫生服务中心	5	6.656	15	2.25361	0.0084456	0.0972795		0.0227127	0.0482305	0.148825	0.75664
		2	钟山	1黄土坡街道第一社区卫生服务中心		10	14	1.4	0.00524663	0.146153		0.0244408	0.0336152	0.173266	0.790256
		2	钟山	2荷城街道办事处社区卫生服务中心	30	11	53	4.81818	0.0180566	0.160768		0.034353	0.0175384	0.207619	0.807794
	毕节	1	毕节市	1市西办事处社区卫生服务中心	500	1.0861	14	12.8902	0.0483071	0.0158737		0.038847	0.0239691	0.246466	0.831763
		1	毕节市	2市东办事处社区卫生服务中心	10	2.5157	15	5.96256	0.0223452	0.0367677		0.0433932	0.0277691	0.289859	0.859532
		1	毕节市	3毕节市社区卫生服务中心	3	1.2	11	9.16667	0.034353	0.0175384		0.0483071	0.0158737	0.338166	0.875406
		2	金沙县	1光明社区卫生服务中心	1.5	0.5702	39	68.3971	0.256325	0.00833365		0.0693999	0.0118384	0.407566	0.887244
		2	金沙县	2长安社区卫生服务中心	2	0.81	15	18.5185	0.0693999	0.0118384		0.0770339	0.0263076	0.4846	0.913552
		2	金沙县	3城关镇紫金社区卫生服务中心	3	3	7	2.33333	0.00874439	0.0438459		0.0818456	0.0294455	0.566446	0.942997
		3	赫章县	1麻姑矿区社区卫生服务中心	6	0.83	19	22.8916	0.0857883	0.0121307		0.0857883	0.0121307	0.652234	0.955128
		3	赫章县	2城关后河社区卫生服务中心	71.63	5.8	11	1.89655	0.00710751	0.0847688		0.0914413	0.0365383	0.743675	0.991666
		3	赫章县	3城关镇龙泉社区小河东四路卫生服务站	1.5	0.5	3	6	0.0224856	0.00730766		0.256325	0.00833365	1	1
					3072.81	68.4214	472	266.838						0	0
宁夏	银川	1	兴庆	1燕鸽湖社区卫生服务中心	2	4	57	14.25	0.197253	0.0583897		0.0484481	0.0291949	0.0484481	0.0291949
		1	兴庆	2玉皇阁北街社区卫生服务中心	10	30	124	4.13333	0.0572149	0.437923		0.0572149	0.437923	0.105663	0.467118
		1	兴庆	3胜利南街天竺社区卫生服务中心		2	7	3.5	0.0484481	0.0291949		0.0685263	0.073717	0.174189	0.540835
		2	金凤	2民生花园社区卫生服务站	0.6	1.26	7	5.55556	0.0769017	0.0183928		0.0769017	0.0183928	0.251091	0.559228
		3	西夏	1朔方路社区卫生服务中心	30	5.6029	38	6.7822	0.0938814	0.081788		0.0867929	0.0349214	0.337884	0.594149
		3	西夏	2怀远路社区卫生服务中心	8	2.3923	15	6.27012	0.0867929	0.0349214		0.0922821	0.0306546	0.430166	0.624804
		3	西夏	3怡安社区卫生服务中心	6	2.1	14	6.66667	0.0922821	0.0306546		0.0938814	0.081788	0.524047	0.706592
	中卫	1	市沙坡头区	市沙坡头区滨河社区卫生服务中心	25	13.5	142	10.5185	0.145601	0.197065		0.133099	0.0379533	0.657146	0.744545
	固原	1	原州	1宋家巷社区卫生服务中心	10	5.05	25	4.9505	0.0685263	0.073717		0.145601	0.197065	0.802747	0.94161
		1		2和平路城市社区卫生服务中心	12	2.6	25	9.61538	0.133099	0.0379533		0.197253	0.0583897	1	1
					103.6	68.5052	454	72.2423

## Sheet: Sheet6
	服务面积（平方公里）	服务人口（万人）	2010在岗人员：卫技人员数（人）	人均拥有卫生资源	人均拥有卫生资源百分比	人数百分比		人均拥有卫生资源百分比	人数百分比	人均卫生资源累计百分比	人数累计百分比
										0	0
河北	1923.47	82.9587	607	315.075	0.167447	0.0690334		0.0356021	0.0581679	0.0356021	0.0581679
辽宁	285.74	106.889	797	224.162	0.119131	0.088947		0.0383932	0.0570061	0.0739953	0.115174
浙江	281.57	144.146	1260	206.756	0.10988	0.11995		0.051915	0.114303	0.12591	0.229477
福建	569.199	101.075	640	204.772	0.108826	0.0841084		0.106864	0.0615679	0.232774	0.291045
山东	234.94	348.474	548	226.042	0.12013	0.28998		0.108826	0.0841084	0.3416	0.375154
北京	1757.22	69.9014	536	66.9904	0.0356021	0.0581679		0.10988	0.11995	0.451481	0.495103
湖南		137.361	504	97.6855	0.051915	0.114303		0.119131	0.088947	0.570612	0.58405
广西	428.671	73.9872	652	201.08	0.106864	0.0615679		0.12013	0.28998	0.690742	0.87403
贵州	3072.81	68.4214	472	266.838	0.141811	0.0569363		0.141811	0.0569363	0.832553	0.930967
宁夏	103.6	68.5052	454	72.2423	0.0383932	0.0570061		0.167447	0.0690334	1	1
	8657.22	1201.72	6470	1881.64
											0.432367
											0.0676333
											0.135267

## Sheet: Sheet7
省	区	服务面积（平方公里）	服务人口（万人）	2010在岗人员：卫技人员数（人）	本科及以上（人）	大专（人）	中专（人）	中专以下（人）	执业医师（人）	副高级以上（人）	中级（人）	初级（人）	无职称（人）	2010年以来参加培训情况：参加培训（人）	参加培训（次）	2010年中心投入培训经费（万元）
n0a	n0c	n13	n14	n41	n41a	n41b	n41c	n41d	n42a	n43a	n43b	n43c	n43d	n51	n52	n53
河北	1	6.7	2.98	18	6	11	0	1	9	2	9	6	1	5	40	0
	1	6	2	16	10	4	2	0	4	3	11	2	0		18	0
	1	6	3.7	22	11	5	6	0	10	4	16	2	0	9	40	0
	2	8.5	0.5	20	5	10	5	0	7	2	1	16	2	21	142	3.6
	2	22	2.9221	20	8	7	4	1	12	2	5	13	0	19	22	3
	2	1.28	9.9093	24	13	9	2	0	12	3	11	9	1	16	34	0
	3	1.6	3.2	40	7	28	5	0	13	1	3	19	17	40	150	2
	3	10	1.9622	11	0	7	4		3	0	2	2		14	77	0
	3	1	1.2852	64	32	26	6	0	32	18	28	1	30	30	17	2.2
	1	11.112	3.4	28	8	14	6	0	13	1	7	17	3	7	13	3
	1	56	5.0368	22	10	11	1	7	7	1	5	18	2	6	28	1
	2	6.25	8.9	27	5	17	3	2	6	1	2	24	0	15	2	0
	2	91.3	3.2	20	3	15	2	0	6	0	4	16	0	8	5	1.2
	2	4.16	8	25	10	11	4	0	8	4	10	11	0	17	3	4.62
	3	42.5	2.3	22	3	13	6	0	4	0	2	20	0	6	/	5.95
	3	25	1.526	11	1	1	9	0	3	0	4	7	0	3	18	4.8
	3	6	1.03	22	5	12	8		7	1	6	18		25	7	6
	1	0.27	0.9	26	16	8	2	0	15	1	10	12	0	6	5	2
	1	0.6	1.9441	47	12	29	6	0	18	1	4	42	0	41	78	2.5
	1	1.5	1.13	27	5	18	4	0	11	1	7	19	0	5	17	2.77
	2	8	3	14	7	16	1		7	0	8	8	0	16	13	0.8
	2	12	3	27	10	15	2	0	17	1	14	18		40	10
	2	4	0.8	7	2	5	0	0	2	0	3	1	0	7	12	0
	3	0.2	4.7	8	22	9	12	/	0	1	2	16	4	0	14	0.37
	3	0.17	2.633	15	3	11	1		6	2	1	6	1	2	8	0.08
	3	0.2	3	24	3	15	6	0	4	1	2	3	0	6	12	0.31
		332.342	82.9587	607	217	327	107	11	236	51	177	326	61	364	785	46.2
辽宁	1	13	13	47	12	24	5	5	19	2	37	12	2	46	295	3.5
	1	3.6	1.2	5	0	1	4	0	1	0	0	1	0	4	10	0.5
	1	1.2	0.8036	4	1	1	2	0	2	1	2	1	0	4	10	0.4
	2	16.1	12	62	18	21	23	0	30	1	28	39	7	10	117	0
	2	4	1.74	5	1	2	2	0	2	0	1	4	0	5	4	0
	2	0.9	1.0252	4	0	2	3	0	2	0	2	2	0	2	4	0
	3	100	12.48	13	3	2	8	0	5	2	4	7	0	9	51	0
	3	1.5	1.99	7	3	0	4	0	1	1	0	4	2	1	60	0.2
	3	1.56	2.33	8	2	6	0	0	2	1	1	6	0	7	88	0
	1	3.5	3.3	13	1	9	3	0	3	1	9	3	0	33	66	5
	1	3.8	4.502	27	10	10	7	0	10	4	16	7	0	4	4	1.2
	1	34.2	1.3	15	2	10	2	1	4	1	11	3	0	2	18	0
	2	1.66	4.35	31	17	8	6	0	13	3	15	13	0	3	19	0.67
	2	5.12	3.5	26	10	15	1	0	11	3	13	10	0	1	0	0.3
	2	2.04	3.0141	21	3	16	2		6	2	16	3		0	0	0
	3	2.4	4.3405	26	13	11	3	0	10	1	8	17	0	24	78	0.37
	3	9.6	3.7	18	15	3	0	0	7	2	3	13	0	18	432	0
	3	2.2	2.8138	18	7	3	8	0	7	5	1	1	0	18	30	0.8
	1	2.5	2.2	50	2	29	19	0	19	2	16	1		6	6
	1	8	4.1	78	10	40	28	0	78	5	40	30	3	0	0	0
	1	3	2	60	35	20	5	0	20	7	43	10	0	0	0	0
	2	13.3	4.2	49	26	16	8	0	17	13	18	18	1	50	18	0
	2	20	6	96	42	40	16	0	21	19	18	23	0	9	0	2
	2	3.5	5	37	5	31	1	0	0	2	15	0	0	35	0	0
	3	15	2.1	22	1	4	17		5	0	4	18	0	8	70	1.2
	3	30	3.5	56	5	25	20	6	11	1	33	11	4	12	208	2.7
	3	40	2.5	21	0	2	16	4	5		5	16	1	40	42	2.5
		341.68	108.989	819	244	351	213	16	311	79	359	273	20	351	1630	21.34
浙江	1	3.02	12.2	55	28	18	9	0	25	3	20	32	0	13	1054	4.41
	1	26.7	3.2457	46	19	22	5	0	13	1	11	32	2	18	420	1.5327
	1	4.5	11.9959	81	36	31	14	0	33	5	41	35	0	9		2.5
	2	3.49	7.26	125	43	52	20	10	56	7	34	74	10	95	47	5
	2	4.31	3.5345	163	57	64	31	11	57	8	57	90	8	37	35	6.5
	2	2.7	8.73414	126	43	48	27	6	62	4	25	82	5	66		17.77
	3	5.5	7.0654	72	40	70	12	0	48	6	24	42	3	12	24	2
	3	8	8.5	87	46	26	6	9	44	1	13	69	4	70	141	5.1
	3	17.76	19.5	125	41	47	32	5	65	5	47	58	15	10	220	15
	1	8	6.7	25	8	12	1	0	13	0	7	18	1	2	40	1
	1	14.82	9.7	60	20	25	10	6	27	0	14	33	3	15	22	1.8
	1	12.5	4.32	68	21	32	11	5	34	2	16	47	4	10	15	10
	1	33.45	2.2635	19	7	11	1	0	9	0	0	0	0	7	16	2
	1	44.1	5	37	5	18	14	2	13	0	10	29	7	12	27	3.97
	1	18.28	4.6	31	4	16	10	1	13	0	5	22	4	15	5	0.3
	2	33.4	3.43	33	3	20	6	4	11	0	8	22	1	33	8	0.64
	2	62.5	3.0066	50	9	23	18	0	15	0	12	23	4	9	77	0.7
	2	63.065	12.59	57	6	25	25	1	28	2	16	37	0	0	0	0
		366.095	133.646	1260	436	560	252	60	566	44	360	745	71	433	2151	80.2227
福建	1	3.349	1.1123	44	5	14	18	7	15	0	8	11	7	36	27	2.14
	1	1.544	6.634	33	13	9	11	0	10	3	8	19	3	21	71	0.08
	1	1.52	0.5759	8	2	1	5	0	4	1	0	3	0	0	0	0
	2	1.07	4.9941	41	7	8	16	10	14	1	4	24	12	16	18	1.8
	2	1.3	5.47	34	10	5	12	7	7	1	3	21	9	12	14	2.8
	2	0.766	1.25	15	1	5	9	0	6	0	3	11	1	0	0	0
	3	4.9	5	55	9	9	29	8	23		8	46	1	27	42	6.8
	3	2.76	5.1583	28	6	10	11	1	9	1	6	19	2	4	19	0.6587
	3	1.5	0.95	10	2	6	2	0	5	1	3	2	0	2	0	0
	1	7.5	4.96	19	1	7	8	3	7	4	2	12	0	9	15	1.2
	1	7.5	4.96	7	2	1	4	0	4	1	1	2	0	3	10	0.14
	1	30	4.8	19	1	5	10	3	7	5	3	10	1	2	27	0.56
	2	21.1	4.4	38	9	11	18	0	19	2	12	24	0	24	44	2.4
	2	17	2.7	13	3	9	1	0	3	0	0	5	3	9	23	0.58
	2	19	4.6	15	0	8	7	0	4	1	3	7	4	6	7	2
	3	100	16.5	46	6	22	18	0	20	6	10	27	3	11	28	2.2
	1	24.5	3.7	18	1	2	14	3	6	1	6	9	4	5	42	1.3472
	1	13.68	3.4	23	1	4	11	7	9	1	8	13	1	12	23	1.6
	2	5	1.26	7	0	2	2	3	2	0	0	7	0	0	3	0
	2	80	4.2	30	3	11	16	0	8	1	10	15	4	2	40	2.2
	2	43	2.45	35	0	16	18	1	12	4	15	15	1	3	46	1.5
	3	8	3.1	24	1	6	14	3	8	1	6	14	2	3	23	1.1
	3	7	5	37	0	4	22	11	10	0	4	33	5	2	16	5
	3	16.73	3.9	41		5	31	5	11	2	3	32	4	2	19	3
		418.719	101.075	640	83	180	307	72	223	37	126	381	67	211	557	39.1059
山东	1	0.7	0.7	16	0	10	6	0	6	1	6	6	3	2	19	0
	1	5.3	3.81	22	3	14	5	0	7	0	3	19	0	4	73	2.7
	1	2.8	2.16	35	14	12	9	0	9	9	11	15	0	5	66	2.48
	2	5.71	2	24	9	9	4	2	5	3	11	8	2	21	28	0.15
	2	0.75	1.91	12	1	3	7	1	5	1	4	5	2	3	23	1
	2	0.62	1.2	19	6	10	3	0	7	3	6	6	4	9	36	0.9
	3	0.8	1.3	14	3	3	7	1	2	1	2	2	0	0	6	0.1
	3	3	1.8	17	1	6	10	0	1	2	3	11	1	18	53	0.18
	3	3	2.12	22	8	13	1	0	8	6	8	5	3	2	30	0.1
	1	8	3.5	70	8	31	20	1	20	6	31	20	13	66	67	0.5
	1	3.2	3.864	49	16	14	19	0	13	2	13	23	11	10	6	0.6
	1	6	3	29	4	14	11	0	7	2	8	16	3	22	17	0.5
	2	8	5.85	62	4	31	27	0	16	4	6	45	7	46	28	4.6
	2	6	6.2	65	8	34	20	3	23	5	34	19	7	65	909	6.2
	2	19.6	5.04	39	6	17	16	0	14	1	6	20	17	21	46	1
	1	1.4	1.4	44	10	15	15	4	11	4	17	10	11	8	12	1.5
	1	2	0.98	5	1	4	0	0	1	0	0	3	2	0	0	0
	1	1	0.14	4	1	3	0	0	2	0	0	4	0	0	0	0
		77.88	46.974	548	103	243	180	12	157	50	169	237	86	302	1419	22.51
湖南	1	1.72	6.3	19	7	6	4	2	6	2	2	12	3	26	17	2.9
	1	1.76	11	41	14	16	11	0	10	1	1	36	3	74	61	5
	1	20	17.9097	49	14	20	15	0	12	2	6	31	10	58	16	1
	2	0.98	4.1	21	4	9	3	5	5	0	6	14	1	2	26	0.5
	2	0.96	3.4	19	5	10	4	0	9	0	7	8	4	3	28	5
	2	12.8	10.2	36	5	14	24	3	10	2	2	10	22	3	44	3
	3	1.57	4.1	74	13	49	10	2	18	1	14	49	10	23	28	12
	3	11.7	3.0153	25	3	13	8	1	6	1	2	15	7	6	30	1.64
	3	7.7	5.6418	26	5	15	4	2	7	1	4	17	4	20	10	1.5
	1	15.8	11.28	26	4	21	1	0	4	0	4	4	18	10	9	1
	1	8.16	4	5	1	4	0	0	0	0	1	4	0	13	8	0.5
	1	5.5	4.488	7	1	6	0	0	2	1	2	4	0	9	9	0.52
	2	4.7	4.4	9	0	9	0	0	3	0	0	0	0	3	19	2.6
	2	8	5.9	8	2	4	2	0	3	0	2	5	1	7	8	5
	2	6	4.7	11	4	7	0	0	7	1	2	8	0	2	5	0
	1	64.24	6.4	30	1	14	14	1	9	0	7	22	1	30	3	0
	1	23.73	13.72	21	4	15	2	0	3	1	7	10	3	20	2
	1	63.5	5.435	17	2	9	6	0	4	0	3	0	14	7	7
	2	18.28	1.7	19	0	14	5	0	3	0	5	3	11	16	4	2
	2	15.3	8.3	30	2	15	12	1	7	0	9	15	6	28	6	10
	2	29.6	1.3707	11	0	8	3	0	4	0	3	4	4	10	8	1.5
		322	137.361	504	91	278	128	17	132	13	89	271	122	370	348	55.66
广西	1	2.37	4.4559	36	18	4	14	0	20	4	26	6	0	2	18	1
	1	12.4	10.04	39	9	11	19	0	13	0	21	17	1	5	32	2.17
	1	1.367	1.7	10	2	3	5	0	5	0	3	7	0	10	56	0.25
	2	4.5	8.84	58	19	24	15	0	27	3	32	23	0	49	89	3.7
	2	5	6.2	39	10	20	9	0	18	3	21	15	0	6	32	1.05
	2	2.7	1.8	18	4	3	11	0	10	0	9	1	0	4	22	0
	3	26.3	10.1945	59	24	21	13	0	24	1	20	38	0	15	33	1.5
	3	0.6	0.8609	9	2	4	3	0	4	3	0	2	0	3	8	0
	3	12	3.8112	58	13	35	10	0	19	2	11	33	10	36	76	1.863
	1	5	4	28	10	9	7	2	12	2	13	13	0	3	11	0
	1	3.4825	3.1295	58	21	24	14	0	25	7	24	4	13	10	16	3
	2	0.22	3.3	17	14	2	1	0	12	2	10	5	0	5		1
	2	2.14	0.69	13	7	2	4	0	6	1	8	3	0	5	5	0
	2	1.7	1.9002	10	2	3	5	0	3	1	1	1	0	2	1	0
	3	1.3	1.148	24	1	8	15	0	8	0	7	14	0	11
	3	61	2.354	52	15	26	10	1	17	0	11	39	2	30	42	0
	3	8	6.363	49	12	25	12	0	23	0	17	3	2	9	5	2
	1	28	3.2	75	3	27	45	0	15	2	6	19	76	12	18	5.6
		178.079	73.9872	652	186	251	212	3	261	31	240	243	104	217	464	23.133
贵州	1	17.5	1.8	37	13	12	12		14	2	8	10	0	4	2
	1	3.2	2.3	15	0	2	13	0	5	0	2	4	0	2	11	0.3
	1	1.83	1.64	17	6	3	2	6	6		6	11		2	22	0.2
	2	5.2	3.3	20	6	5	9		6	2	3	15		10	10	1
	2	2.95	4.2987	19	1	5	13		10	3	5	12	4			0.9
	2	4	4.7	16	3	8	4	1	5	1	7	8		6	12	0
	3	3.5	1.9	22	5	4	13	0	3	0	2	13	7	3	2	0.6
	3	1	2.0147	44	13	9	20	3	18	3	11	21	9	0	0
	3	1	2.5	61	24	9			24	3	11	35		1	18
	1	5	6.656	15	0	4	10	0	6	0	9	5	1	6	16	0
	2	8.28	10	14		2	11		21	1	2	11		16	33
	2	30	11	53	7	13	22	0	14	1	11	34	0	53	24	3
	1	5	1.0861	14	9	5	0	0	9	3	6	5	0	30	7	2
	1	10	2.5157	15	3	4	8	0	2	0	2	11	2	8	5	3.8
	1	3	1.2	11	0	8	3	0	1	0	0	3	8	10	7	3.5
	2	1.5	0.5702	39	7	15	17	0	6	0	6	8	25	45	9	0.3
	2	2	0.81	15	0	3	11	1	3	0	0	5	10	2	6	0
	2	3	3	7	1	1	5	0	1	0	1	1	5	3	3	1
	3	6	0.83	19	0	18	1	0	5	0	2	15	2	12	14	0.75
	3	71.63	5.8	11	2	9	0	0	6	0	3	6	2	2	8	0.6
	3	1.5	0.5	3	0	1	2	0	1	0	0	2	1	2	5	0.2
		187.09	68.4214	467	100	140	176	11	166	19	97	235	76	217	214	18.15
宁夏	1	2	4	57	17	18	19	3	22	4	22	29	2	44	88	15
	1	10	30	124	48	38	25	13	64					16	16
	1	3.75	2	7	3	2	1		2	3	3	0	1	2	1
	2	0.6	1.26	7	1	5	1	0	2	1	2	1	3	4	34	0
	3	30	5.6029	38	6	22	10	0	18	6	6	12	14	20	11	0.2
	3	8	2.3923	15	7	5	2	1	4	3	4	3	5	13	5	0.5
	3	6	2.1	14	3	7	3	1	6	2	4	1	1	10	10	1
	1	25	13.5	142	14	75	49	4	51	7	32	77	26	142	39	4.2
	1	10	5.05	25	3	18	4	1	10	2	9	2	14	6	10	2.4
	1	12	2.6	25	1	21	3		11	5	6	3		4	4	0.4
		107.35	68.5052	454	103	211	117	23	190	33	88	128	66	261	218	23.7
北京		5.13	7.3	175	50	71	54	0	83	23	38	100	14	23	65	3.8
		9.27	7.9215	96	32	51	13	0	51	2	16	89	0	96	42	6.13
		4.4	8.51	95	40	25	30	0	45	12	25	48	4	95	475	3.761
		11.12	24	98	36	47	15	0	59	1	52	45	0	83	80	10
		17.9	10	49	20	12	17	0	22	5	20	29	0	4	44	0
		5.3	9.1699	69	14	29	19	0	65	18	17	27	9	9	90	1
		13	3	40	18	9	12	3	15	4	16	22	0	4	16	0.2286
		66.12	69.9014	622	210	244	160	3	340	65	184	360	27	314	812	24.9196

## Sheet: Sheet8
省	区	服务面积（平方公里）	服务人口（万人）	2010在岗人员：卫技人员数（人）	人均拥有卫生资源	人均拥有卫生资源百分比	人数百分比	服务面积百分比	本科及以上（人）	人均拥有本科以上资源	人均拥有本科以上资源百分比	大专（人）	中专（人）	中专以下（人）	执业医师（人）	人均拥有执业医师	人均拥有执业医师百分比	副高级以上（人）	中级（人）				初级（人）	无职称（人）			2010在岗人员：卫技人员数（人）	2010年以来参加培训情况：参加培训（人）	参加培训（次）	2010年中心投入培训经费（万元）	人均拥有培训次数	人均拥有培训次数百分比	卫生人员人数百分比	人均中心投入培训经费	人均投入培训经费百分比
河北		332.342	82.9587	607	7.31689	0.0949141	0.093022	0.138629	217	2.61576	0.129005	327	107	11	236	2.84479	0.0947184	51	177	228	2.74836	0.0999619	326	61			607	394	785	46.2	1.29325	0.106912	0.0923475	0.076112	0.139639	0.649094	0.132106
辽宁		341.68	108.989	819	7.51451	0.0974775	0.12221	0.142524	244	2.23875	0.110411	351	213	16	311	2.85349	0.0950082	79	359	438	4.01875	0.146168	273	20			819	351	1630	21.34	1.99023	0.164531	0.124601	0.0260562	0.0478038	0.428571	0.0872245
浙江		366.095	133.646	1260	9.42791	0.122298	0.149858	0.152708	436	3.26236	0.160894	560	252	60	566	4.23508	0.141009	44	360	404	3.02292	0.109948	745	71			1260	433	2151	80.2227	1.70714	0.141129	0.191693	0.0636688	0.11681	0.343651	0.0699411
福建		418.719	101.075	640	6.33196	0.0821376	0.113335	0.174659	83	0.821176	0.0404989	180	307	72	223	2.20629	0.0734593	37	126	163	1.61267	0.0586553	381	67			640	211	557	39.1059	0.870313	0.0719482	0.097368	0.061103	0.112102	0.329688	0.0670993
山东		77.88	46.974	548	11.666	0.151331	0.0526722	0.0324858	103	2.1927	0.10814	243	180	12	157	3.34227	0.111282	50	169	219	4.66215	0.16957	237	86			548	302	1419	22.51	2.58942	0.214066	0.0833714	0.0410766	0.0753611	0.551095	0.112161
湖南		322	137.361	504	3.66918	0.0475962	0.154023	0.134315	91	0.66249	0.0326728	278	128	17	132	0.960975	0.031996	13	89	102	0.742572	0.0270085	271	122			504	370	348	55.66	0.690476	0.0570813	0.0766773	0.110437	0.202612	0.734127	0.149412
广西		178.079	73.9872	652	8.81234	0.114313	0.0829622	0.0742816	186	2.51395	0.123983	251	212	3	261	3.52764	0.117454	31	240	271	3.6628	0.133221	243	104			652	217	464	23.133	0.711656	0.0588322	0.0991937	0.0354801	0.0650933	0.332822	0.0677372
贵州		187.09	68.4214	467	6.82535	0.0885378	0.0767213	0.0780402	100	1.46153	0.0720801	140	176	11	166	2.42614	0.0807793	19	97	116	1.69538	0.0616634	235	76			467	217	214	18.15	0.458244	0.0378828	0.0710482	0.0388651	0.0713037	0.464668	0.094571
宁夏		107.35	68.5052	454	6.62723	0.0859679	0.0768152	0.0447785	103	1.50354	0.0741517	211	117	23	190	2.77351	0.0923452	33	88	121	1.76629	0.0642426	128	66			454	261	218	23.7	0.480176	0.0396959	0.0690704	0.0522026	0.0957733	0.57489	0.117004
北京		66.12	69.9014	622	8.89825	0.115427	0.0783808	0.0275804	210	3.00423	0.148163	244	160	3	340	4.86399	0.161949	65	184	249	3.56216	0.129561	360	27			622	314	812	24.9196	1.30547	0.107922	0.0946295	0.0400637	0.0735026	0.504823	0.102744
		2397.36	891.818	6573	77.0896	1	1	1	1773	20.2765	1					30.0342	1				27.494	1					6573	3070	8598		12.0964			0.545065		4.91343
					地均拥有卫生资源	地均拥有卫生资源百分比				地均拥有本科以上资源	地均拥有本科以上资源百分比					地均拥有执业医师	地均拥有执业医师百分比			地均拥有中级职称以上	地均拥有中级以上职称百分比
					1.82643	0.0485895				0.652942	0.0648024					0.710112	0.0461417			0.68604	0.0503538
					2.39698	0.0637681				0.714118	0.070874					0.910208	0.0591436			1.2819	0.0940886
					3.44173	0.0915621				1.19095	0.118198					1.54605	0.100459			1.10354	0.0809972
					1.52847	0.0406627				0.198224	0.0196731					0.532577	0.0346058			0.389283	0.0285725
					7.03647	0.187195				1.32255	0.131259					2.01592	0.130991			2.81202	0.206396
					1.56522	0.0416403				0.282609	0.028048					0.409938	0.026637			0.31677	0.0232502
					3.66129	0.0974031				1.04448	0.103661					1.46564	0.0952344			1.52179	0.111696
					2.49612	0.0664057				0.534502	0.0530476					0.887274	0.0576534			0.620022	0.0455082
					4.22916	0.11251				0.959478	0.0952252					1.76991	0.115006			1.12715	0.0827306
					9.40714	0.250263				3.17604	0.315212					5.14217	0.334128			3.76588	0.276407
					37.589	1				10.0759	1					15.3898	1			13.6244	1
	人均拥有卫生资源百分比	人数百分比	人均卫生资源累计百分比	人数累计百分比			人均拥有本科以上资源百分比	人数百分比					人均拥有执业医师百分比	人数百分比													人均拥有培训次数百分比	卫生人员人数百分比	人均拥有培训次数累计百分比	卫生人员累计百分比				人均投入培训经费累计百分比
			0	0					0	0					0	0					0	0							0	0				0				0
湖南	0.0475962	0.154023	0.0475962	0.154023		湖南	0.0326728	0.154023	0.0326728	0.154023		湖南	0.031996	0.154023	0.031996	0.154023		湖南	0.0270085	0.154023	0.0270085	0.154023				贵州	0.0378828	0.0710482	0.0378828	0.0710482		辽宁	0.0478038	0.0478038		福建	0.0670993	0.0670993
福建	0.0821376	0.113335	0.129734	0.267358		福建	0.0404989	0.113335	0.0731718	0.267358		福建	0.0734593	0.113335	0.105455	0.267358		福建	0.0586553	0.113335	0.0856637	0.267358				宁夏	0.0396959	0.0690704	0.0775787	0.140119		广西	0.0650933	0.112897		广西	0.0677372	0.134837
宁夏	0.0859679	0.0768152	0.215702	0.344174		贵州	0.0720801	0.0767213	0.145252	0.34408		贵州	0.0807793	0.0767213	0.186235	0.34408		贵州	0.0616634	0.0767213	0.147327	0.34408				湖南	0.0570813	0.0766773	0.13466	0.216796		贵州	0.0713037	0.184201		浙江	0.0699411	0.204778
贵州	0.0885378	0.0767213	0.30424	0.420895		宁夏	0.0741517	0.0768152	0.219404	0.420895		宁夏	0.0923452	0.0768152	0.27858	0.420895		宁夏	0.0642426	0.0768152	0.21157	0.420895				广西	0.0588322	0.0991937	0.193492	0.31599		北京	0.0735026	0.257703		辽宁	0.0872245	0.292002
河北	0.0949141	0.093022	0.399154	0.513917		山东	0.10814	0.0526722	0.327544	0.473567		河北	0.0947184	0.093022	0.373298	0.513917		河北	0.0999619	0.093022	0.311532	0.513917				福建	0.0719482	0.097368	0.26544	0.413358		山东	0.0753611	0.333064		贵州	0.094571	0.386573
辽宁	0.0974775	0.12221	0.496631	0.636127		辽宁	0.110411	0.12221	0.437955	0.595777		辽宁	0.0950082	0.12221	0.468306	0.636127		浙江	0.109948	0.149858	0.42148	0.663775				河北	0.106912	0.0923475	0.372352	0.505705		宁夏	0.0957733	0.428838		北京	0.102744	0.489317
广西	0.114313	0.0829622	0.610944	0.719089		广西	0.123983	0.0829622	0.561938	0.67874		山东	0.111282	0.0526722	0.579589	0.688799		北京	0.129561	0.0783808	0.551041	0.742155				北京	0.107922	0.0946295	0.480275	0.600335		福建	0.112102	0.54094		山东	0.112161	0.601478
北京	0.115427	0.0783808	0.726371	0.79747		河北	0.129005	0.093022	0.690943	0.771762		广西	0.117454	0.0829622	0.697043	0.771762		广西	0.133221	0.0829622	0.684262	0.825118				浙江	0.141129	0.191693	0.621403	0.792028		浙江	0.11681	0.65775		宁夏	0.117004	0.718482
浙江	0.122298	0.149858	0.848669	0.947328		北京	0.148163	0.0783808	0.839106	0.850142		浙江	0.141009	0.149858	0.838051	0.921619		辽宁	0.146168	0.12221	0.83043	0.947328				辽宁	0.164531	0.124601	0.785934	0.916629		河北	0.139639	0.797388		河北	0.132106	0.850588
山东	0.151331	0.0526722	1	1		浙江	0.160894	0.149858	1	1		北京	0.161949	0.0783808	1	1		山东	0.16957	0.0526722	1	1				山东	0.214066	0.0833714	1	1		湖南	0.202612	1		湖南	0.149412	1
							1	1					1	1					1	1
	地均拥有卫生资源百分比	服务面积百分比	地均拥有卫生资源l累计百分比	服务面积累计百分比
			0	0			地均拥有本科以上资源百分比	服务面积百分比					地均拥有执业医师百分比						地均拥有中级以上职称百分比	服务面积百分比
福建	0.0406627	0.174659	0.0406627	0.174659					0	0					0	0					0	0
湖南	0.0416403	0.134315	0.082303	0.308973		福建	0.0196731	0.174659	0.0196731	0.174659		湖南	0.026637	0.134315	0.026637	0.134315		湖南	0.0232502	0.134315	0.0232502	0.134315
河北	0.0485895	0.138629	0.130893	0.447602		湖南	0.028048	0.134315	0.0477211	0.308973		福建	0.0346058	0.174659	0.0612428	0.308973		福建	0.0285725	0.174659	0.0518227	0.308973
辽宁	0.0637681	0.142524	0.194661	0.590126		贵州	0.0530476	0.0780402	0.100769	0.387014		河北	0.0461417	0.138629	0.107385	0.447602		贵州	0.0455082	0.0780402	0.0973309	0.387014
贵州	0.0664057	0.0780402	0.261066	0.668166		河北	0.0648024	0.138629	0.165571	0.525642		贵州	0.0576534	0.0780402	0.165038	0.525642		河北	0.0503538	0.138629	0.147685	0.525642
浙江	0.0915621	0.152708	0.352629	0.820874		辽宁	0.070874	0.142524	0.236445	0.668166		辽宁	0.0591436	0.142524	0.224182	0.668166		浙江	0.0809972	0.152708	0.228682	0.67835
广西	0.0974031	0.0742816	0.450032	0.895155		宁夏	0.0952252	0.0447785	0.33167	0.712944		广西	0.0952344	0.0742816	0.319416	0.742447		宁夏	0.0827306	0.0447785	0.311412	0.723128
宁夏	0.11251	0.0447785	0.562542	0.939934		广西	0.103661	0.0742816	0.435331	0.787226		浙江	0.100459	0.152708	0.419875	0.895155		辽宁	0.0940886	0.142524	0.405501	0.865652
山东	0.187195	0.0324858	0.749737	0.97242		浙江	0.118198	0.152708	0.553529	0.939934		宁夏	0.115006	0.0447785	0.534881	0.939934		广西	0.111696	0.0742816	0.517197	0.939934
北京	0.250263	0.0275804	1	1		山东	0.131259	0.0324858	0.684788	0.97242		山东	0.130991	0.0324858	0.665872	0.97242		山东	0.206396	0.0324858	0.723593	0.97242
	1	1				北京	0.315212	0.0275804	1	1		北京	0.334128	0.0275804	1	1		北京	0.276407	0.0275804	1	1
							1	1					1	1					1	1
	服务面积百分比
	0.138629																													0.387283	0.4289	0.4728
	0.142524																													0.112717	0.0711	0.0272
	0.152708																													0.225433	0.1422	0.0544
	0.174659
	0.0324858
	0.134315
	0.0742816
	0.0780402
	0.0447785
	0.0275804
	1
			人均资源	本科以上学历	执业医师	中级以上				地均资源	本科以上学历	执业医师	中级以上
			0.402958	0.385883	0.390375	0.341883				0.21255	0.22035	0.194333	0.200317
			0.0970417	0.114117	0.109625	0.158117				0.28745	0.27965	0.305667	0.299683
			0.194083	0.228233	0.21925	0.316233				0.5749	0.5593	0.611333	0.599367
